# Supplementary material
Source: PubMed Central journal article supplement (PMC7864883)

## (-)-Epigallocatechin Gallate

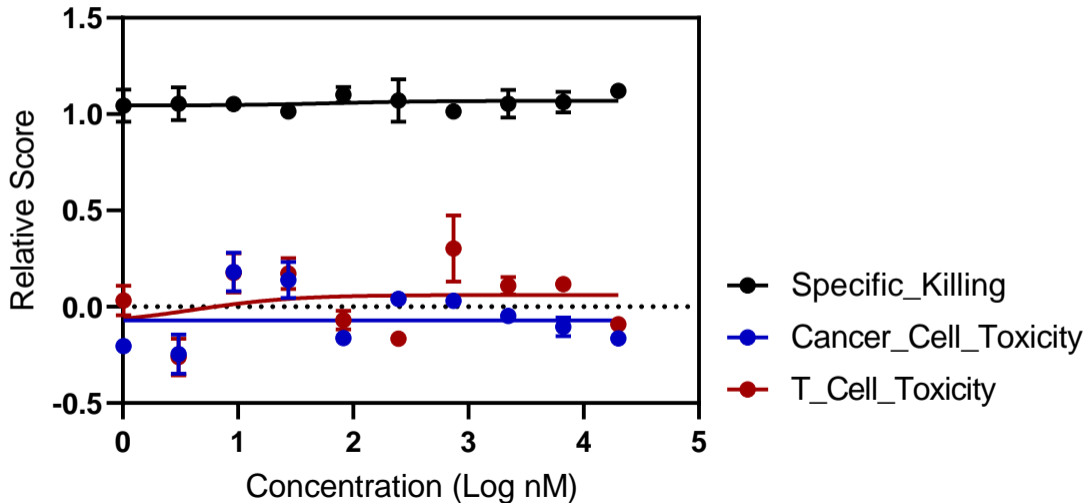

# (R)-(+)-Etomoxir sodium salt

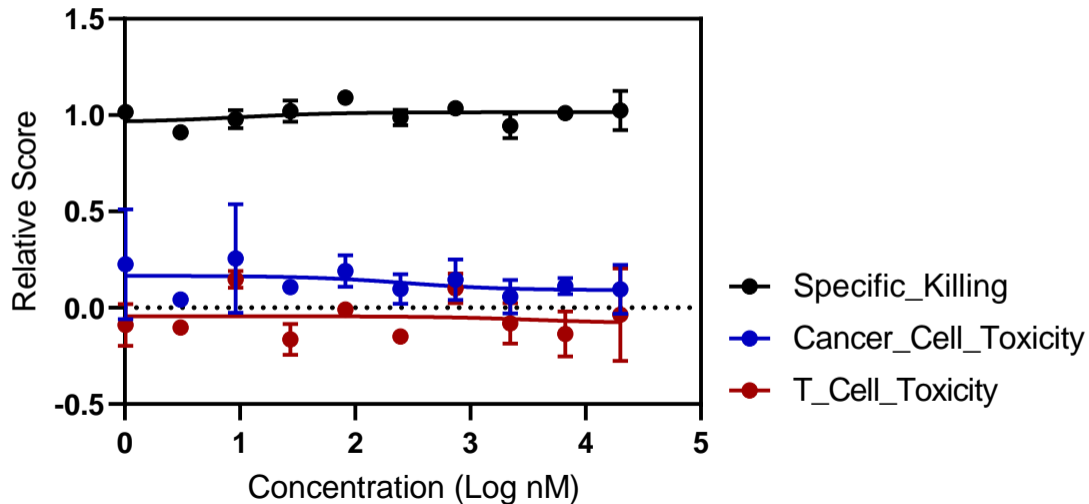

# [6]-Gingerol

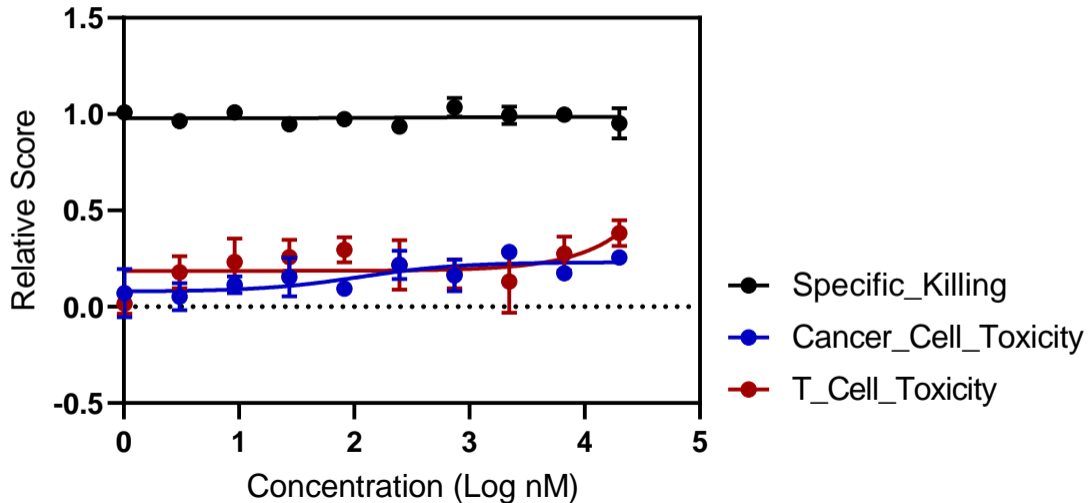

# 1-Deoxynojirimycin

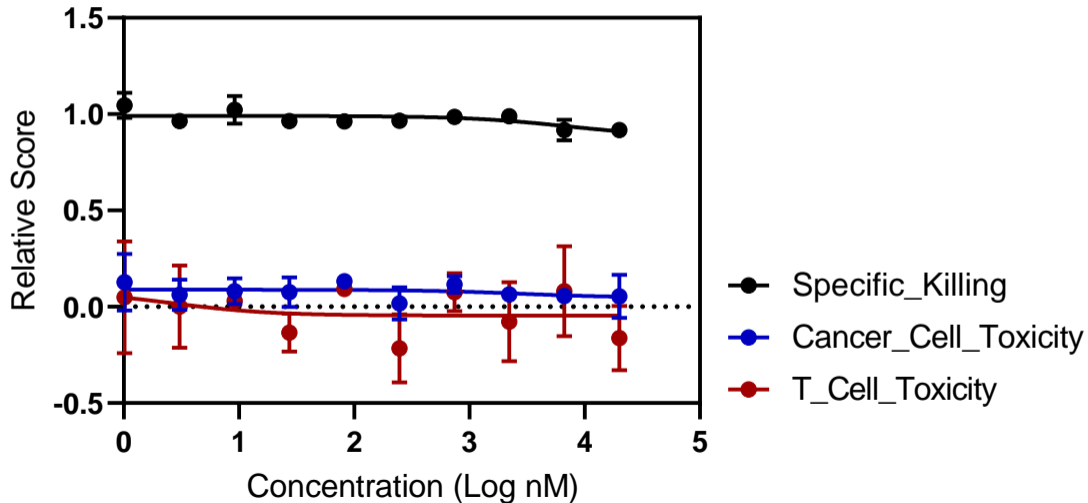

# 1S,3R-RSL3

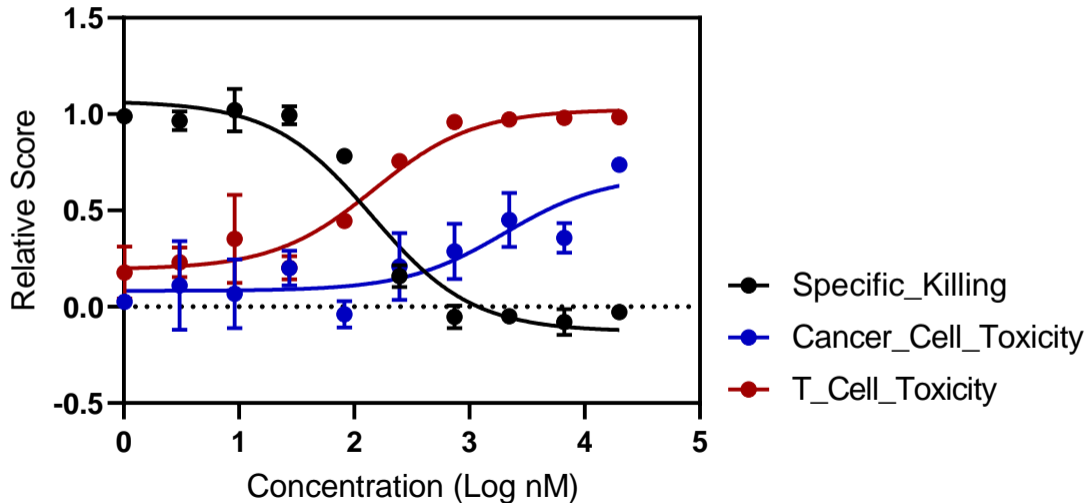

## 2,4-Dinitrophenol

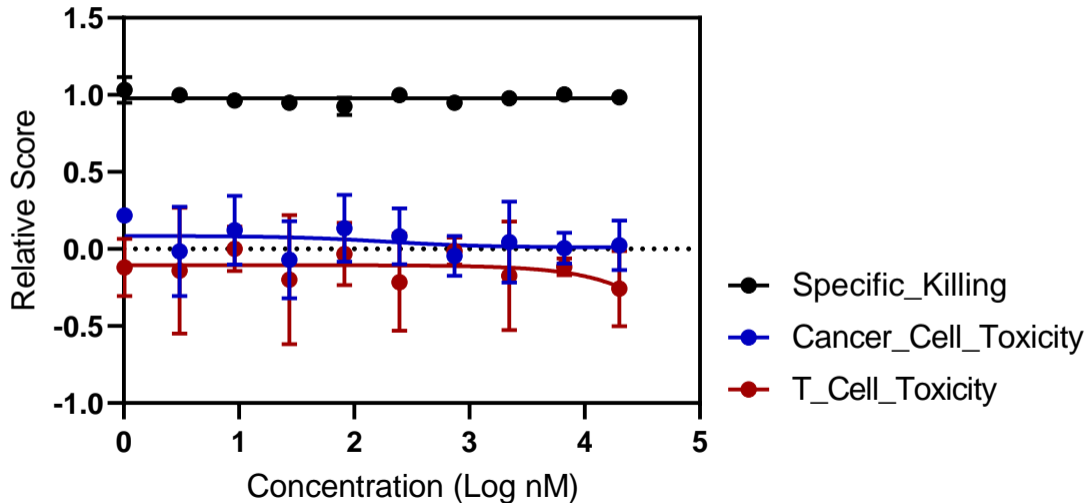

## 2-AAPA hydrate

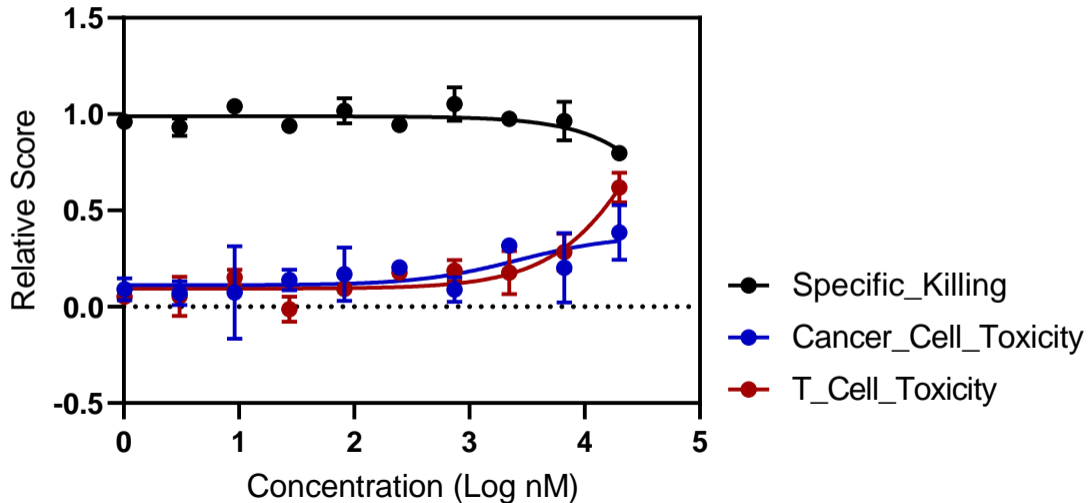

## 2-Deoxy-D-glucose

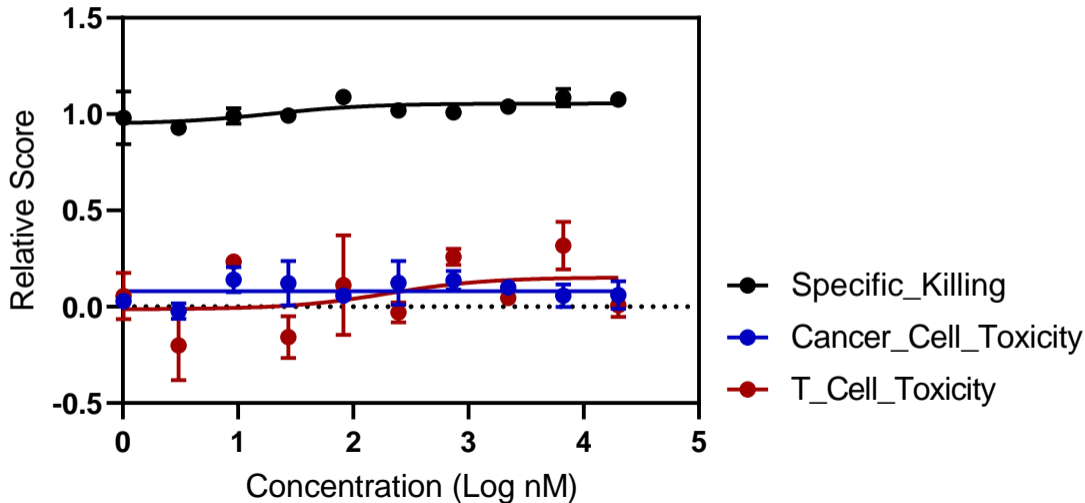



## 2-Methoxyestradiol

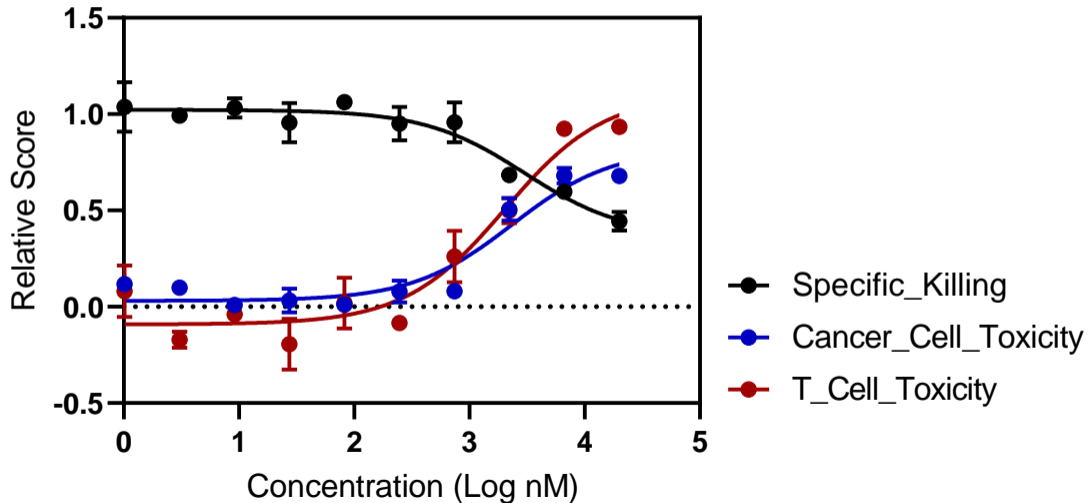

# 3,3-Methylene-bis(4-hydroxy-coumarin)

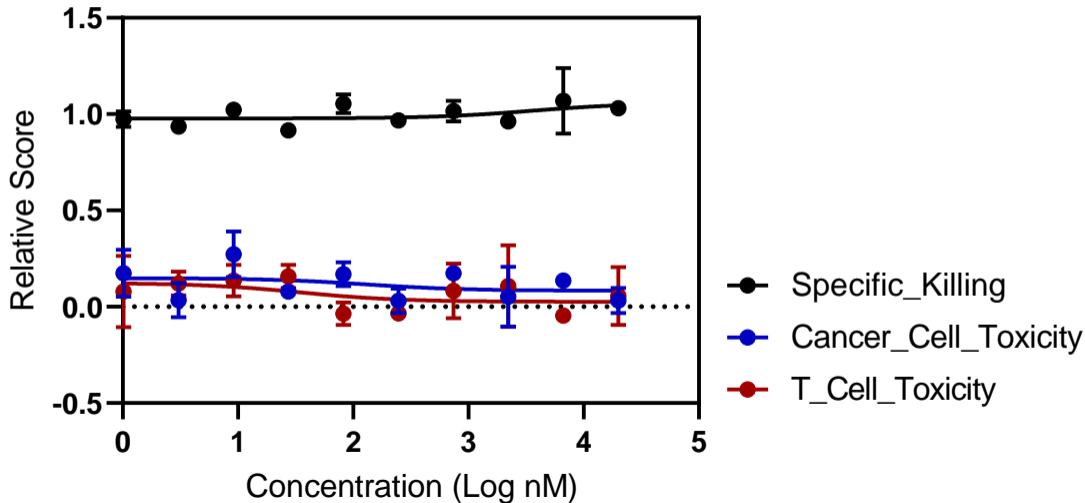

### 3-Nitropropionic acid

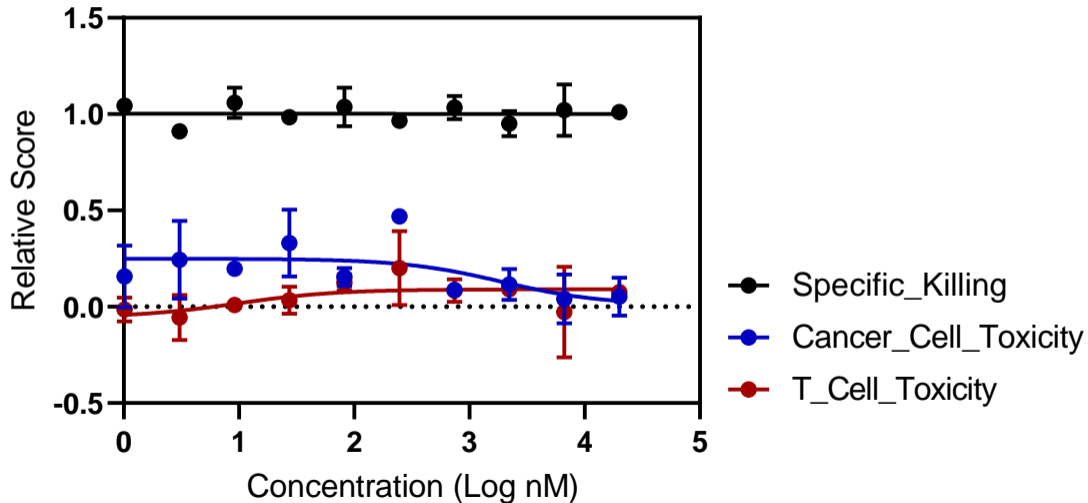

# 3PO

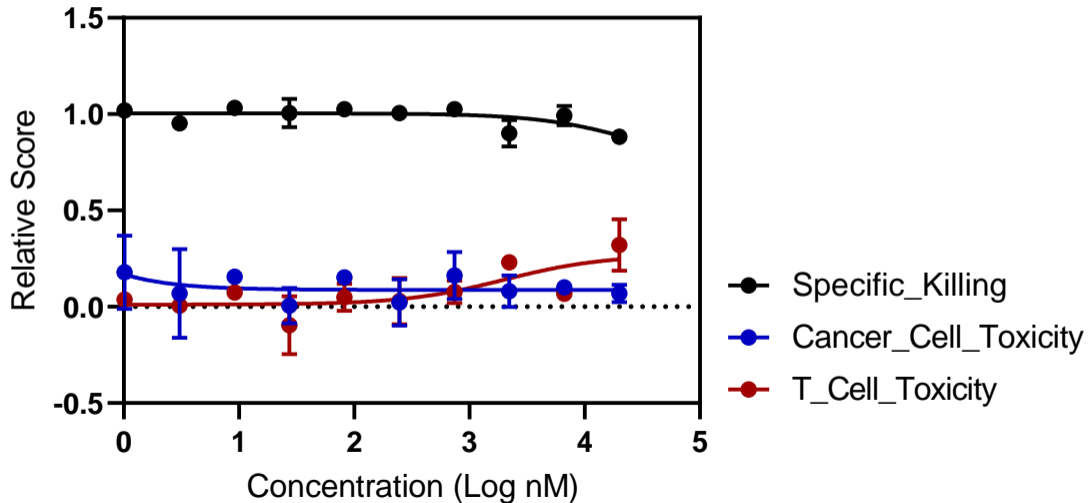

# 4mu8C

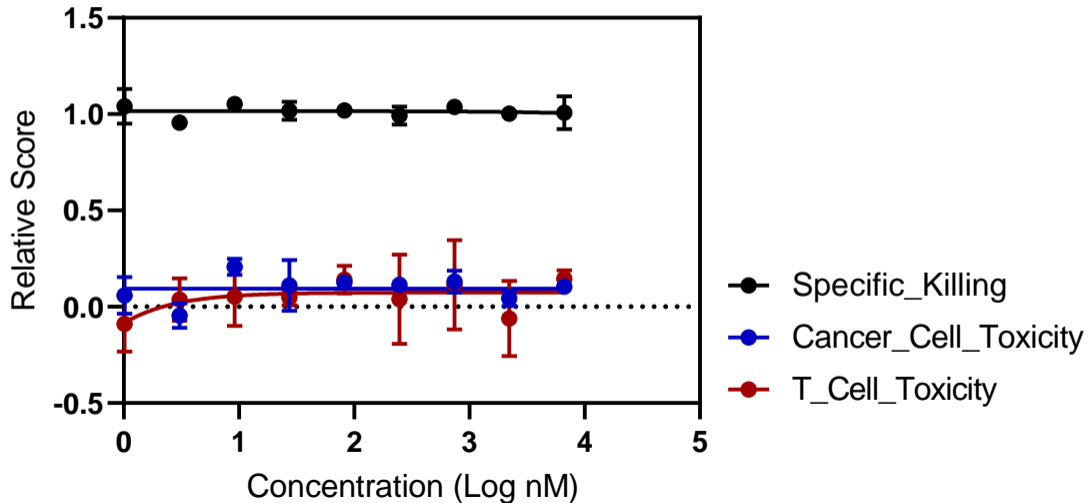

# 5-Fluorouracil

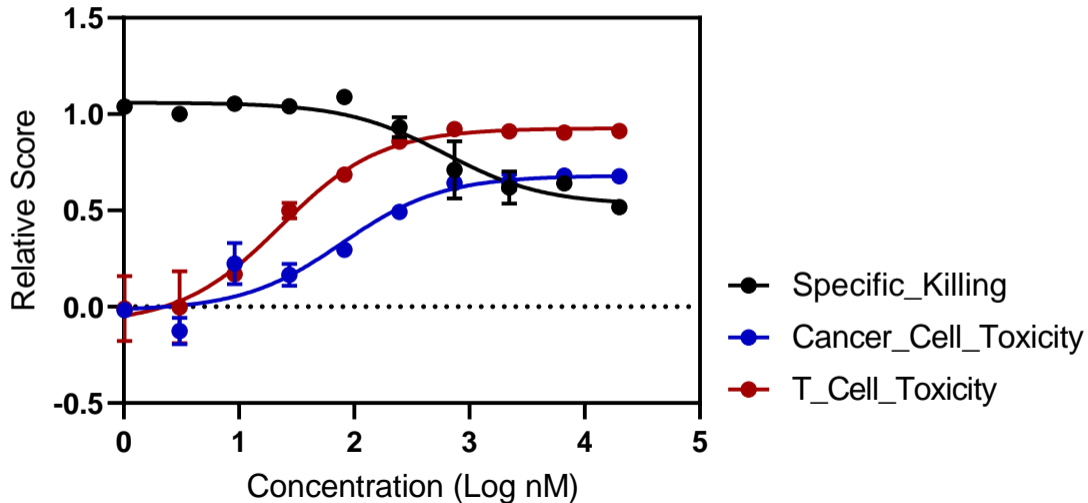

## 6-Aminonicotinamide

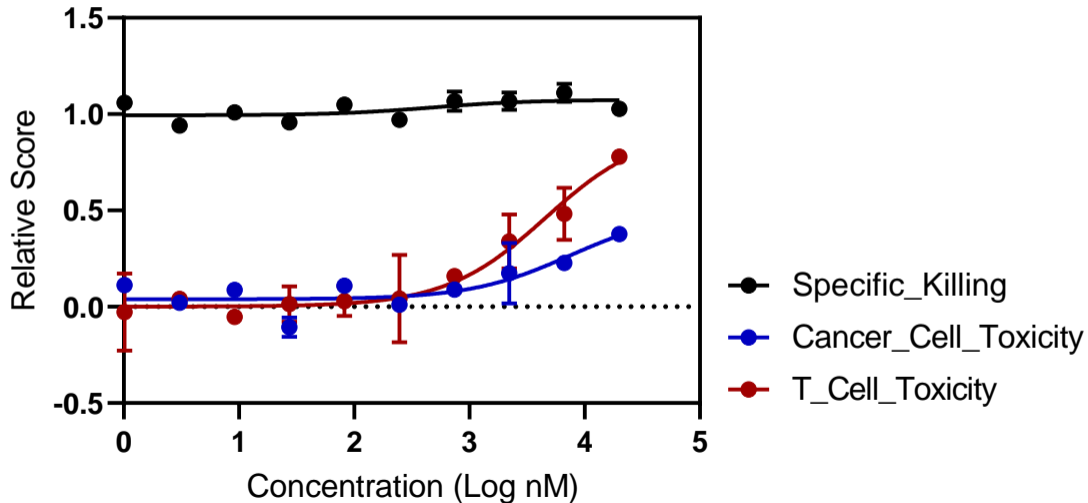

# 6-Azauridine

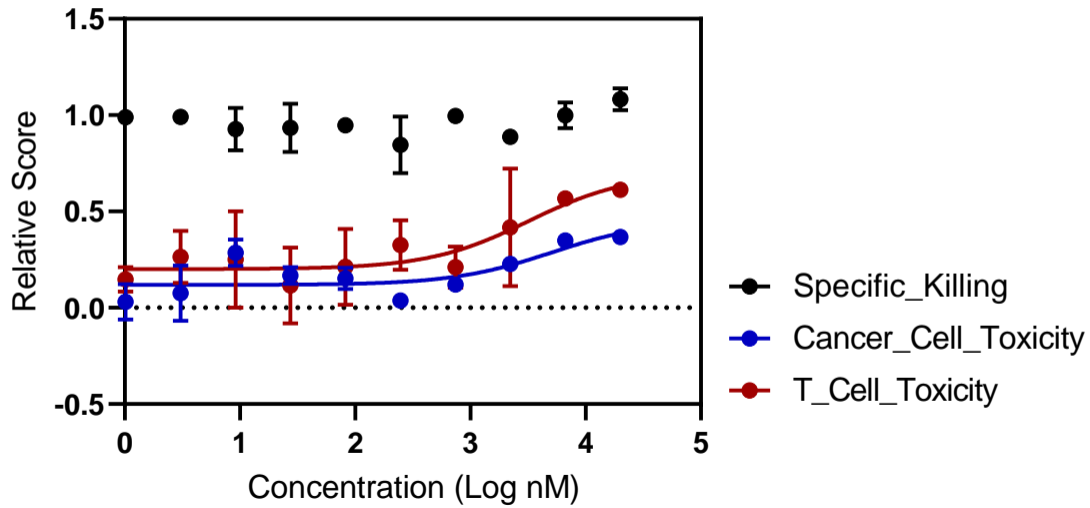



## 6-Mercaptopurine

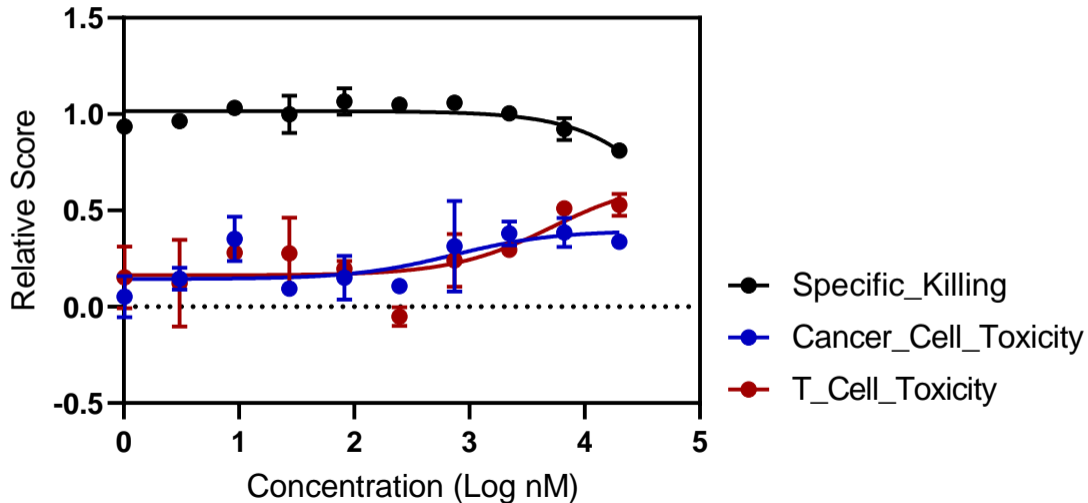

# 6-Thioguanine

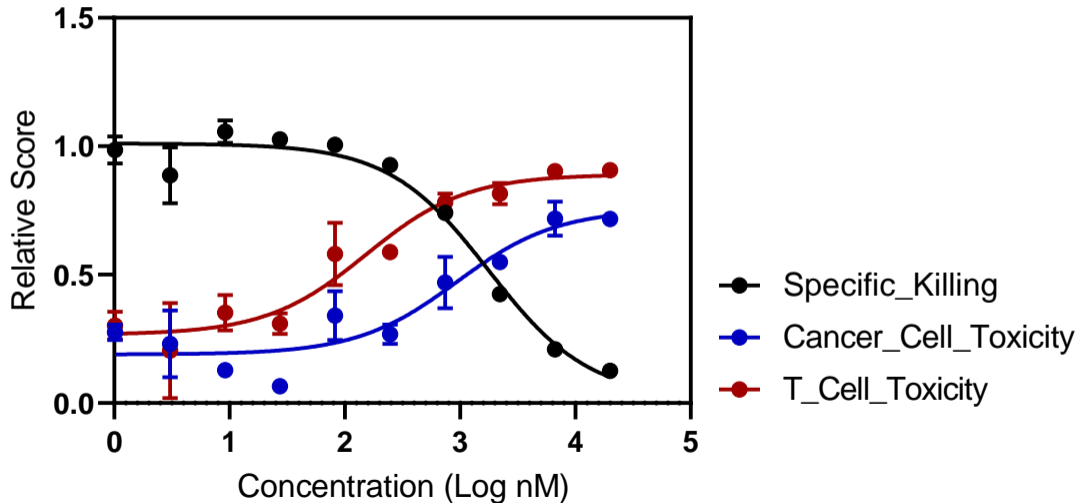

# 17-AAG (Tanespimycin)

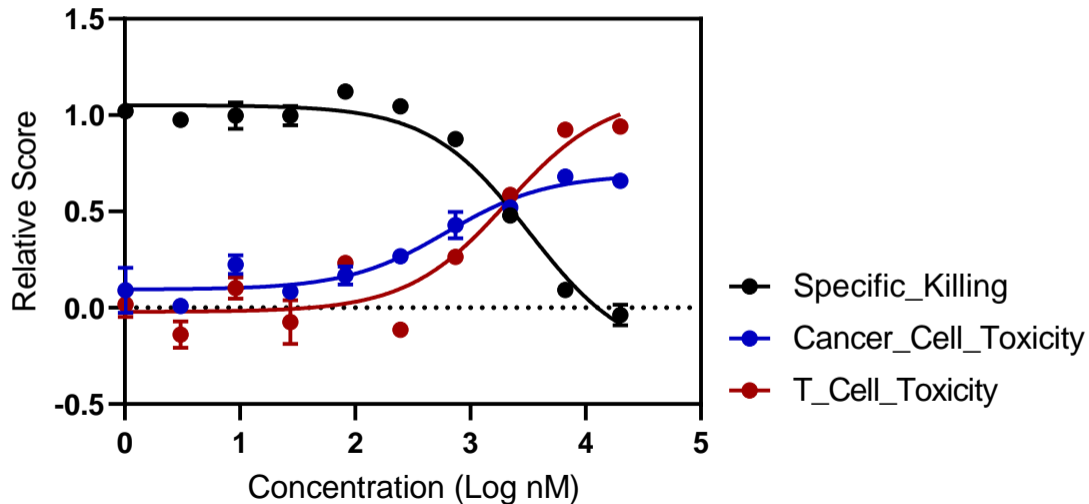

968

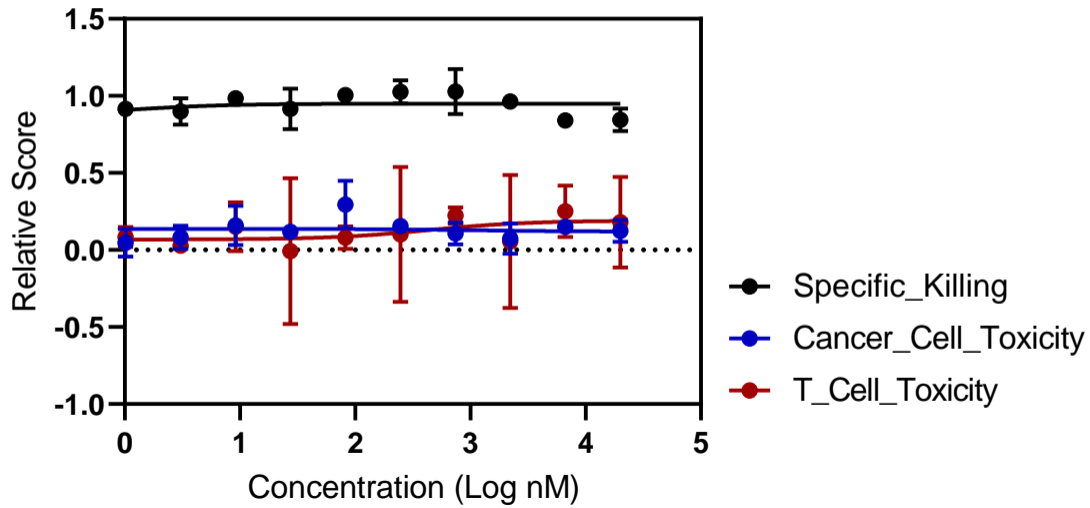

# A922500

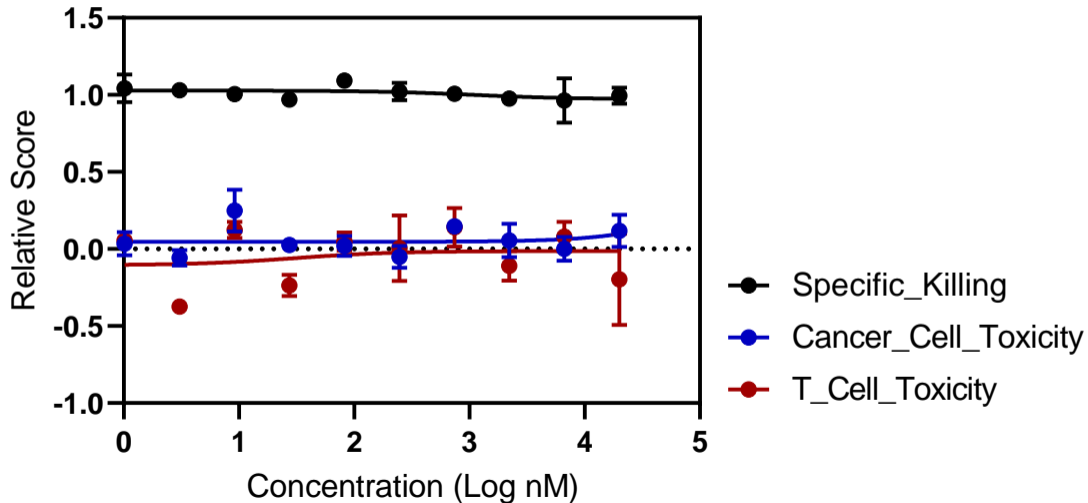

## ABT-263 (Navitoclax)

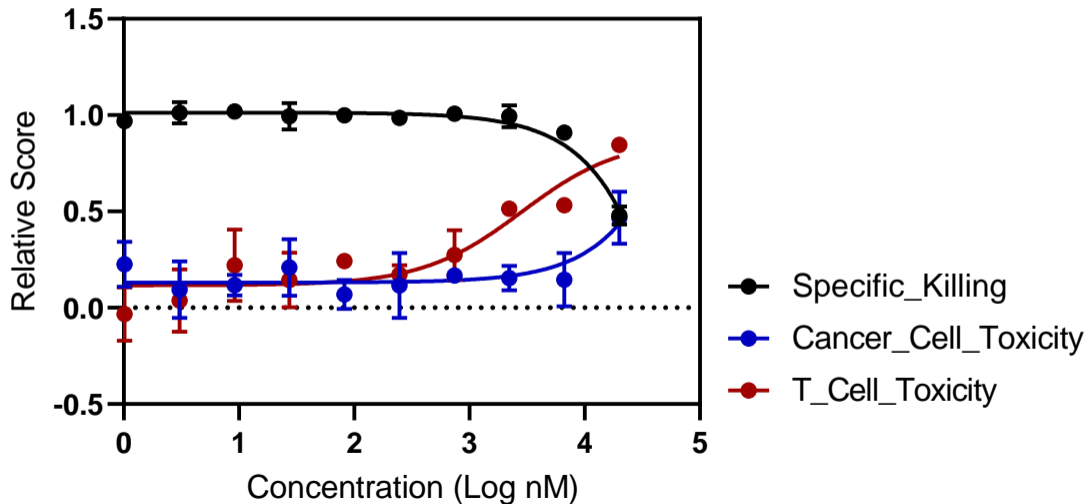

# ABT-737

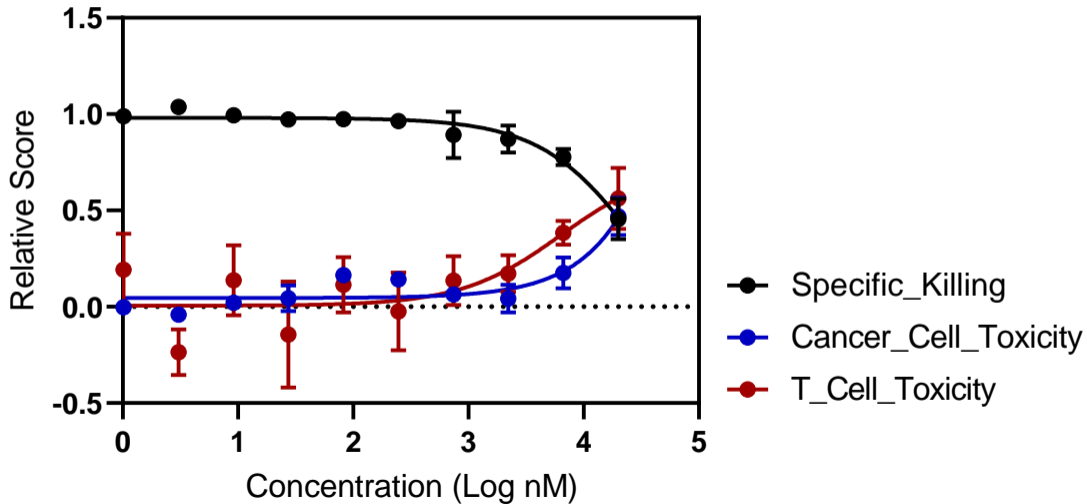

## Aceclofenac (Diclofenac)

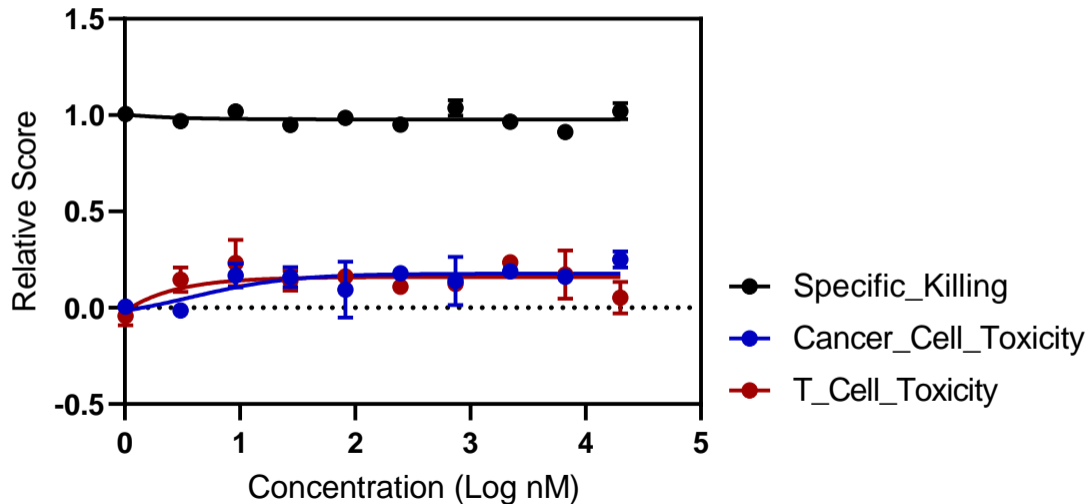



# Acivicin

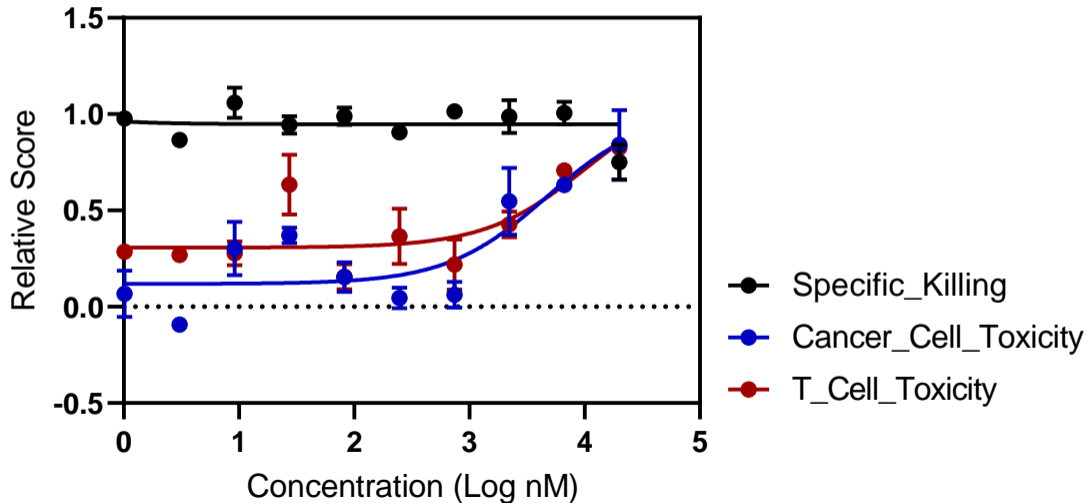

# Actinomycin D

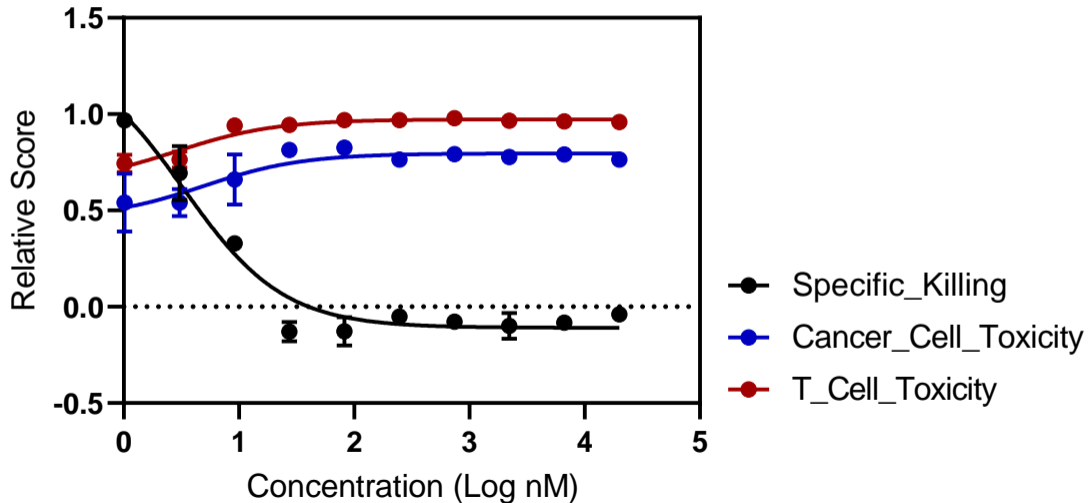

# Actinonin

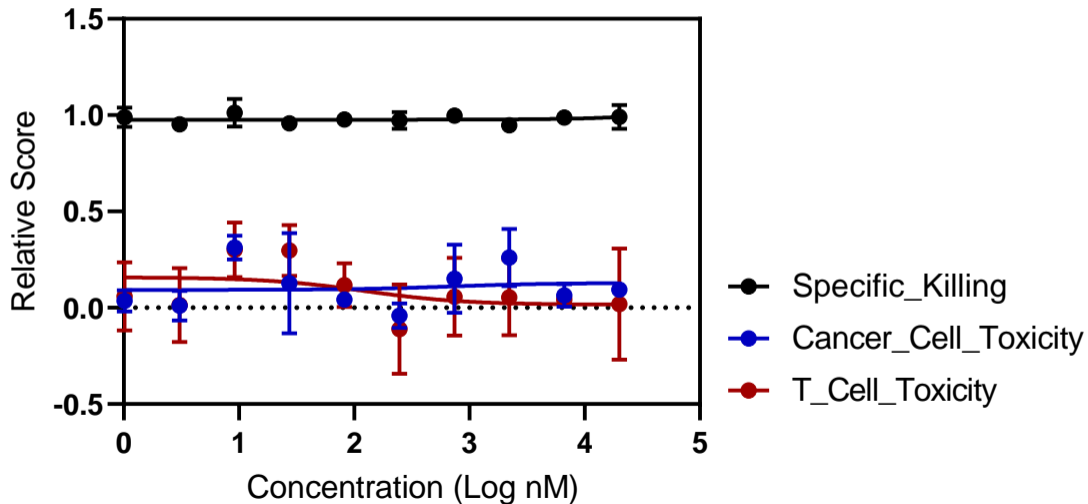

# Adaptaquin

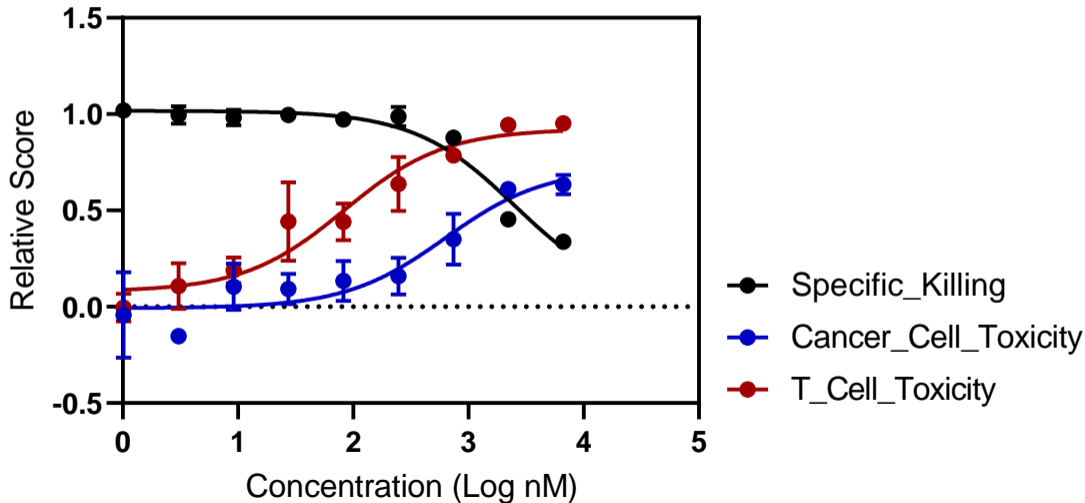

# AEBSF

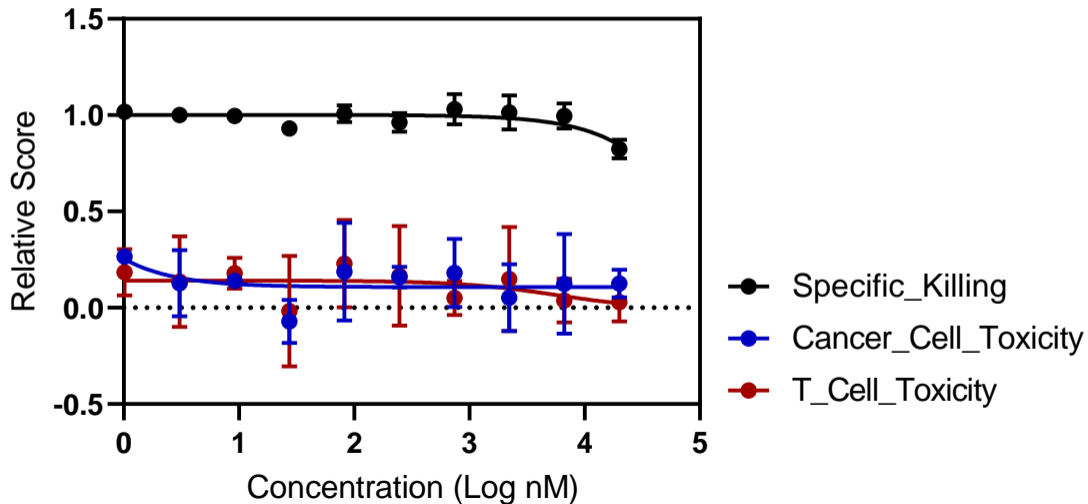

# AEM1

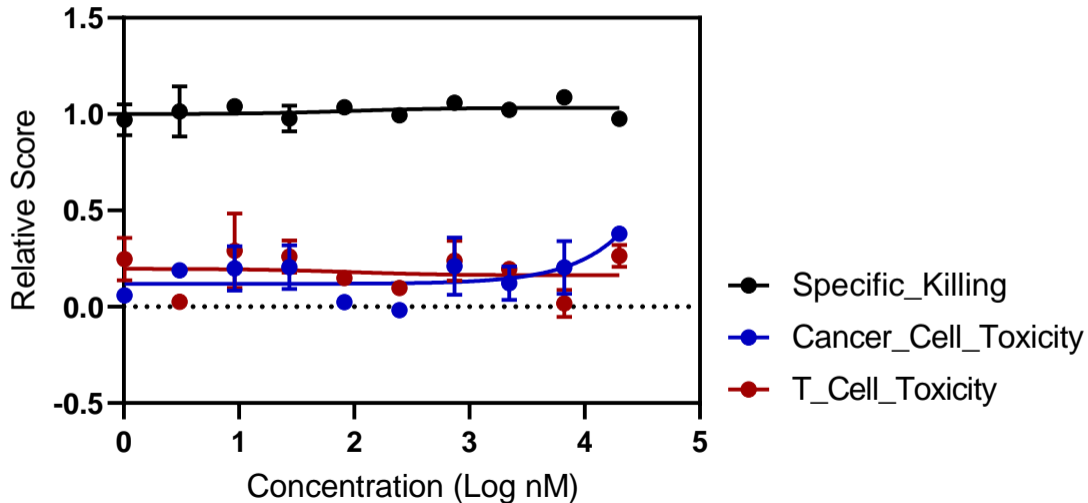

# AG-120

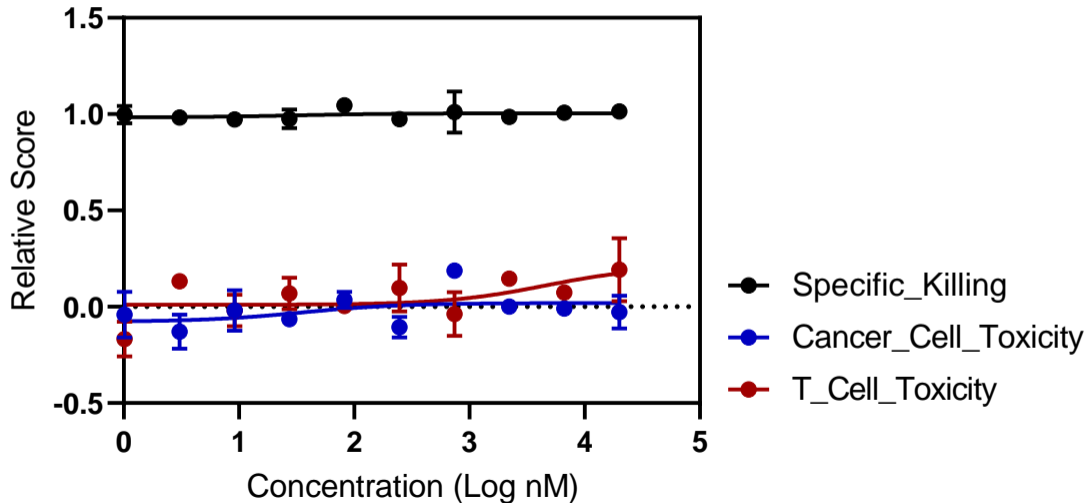

# AG-221

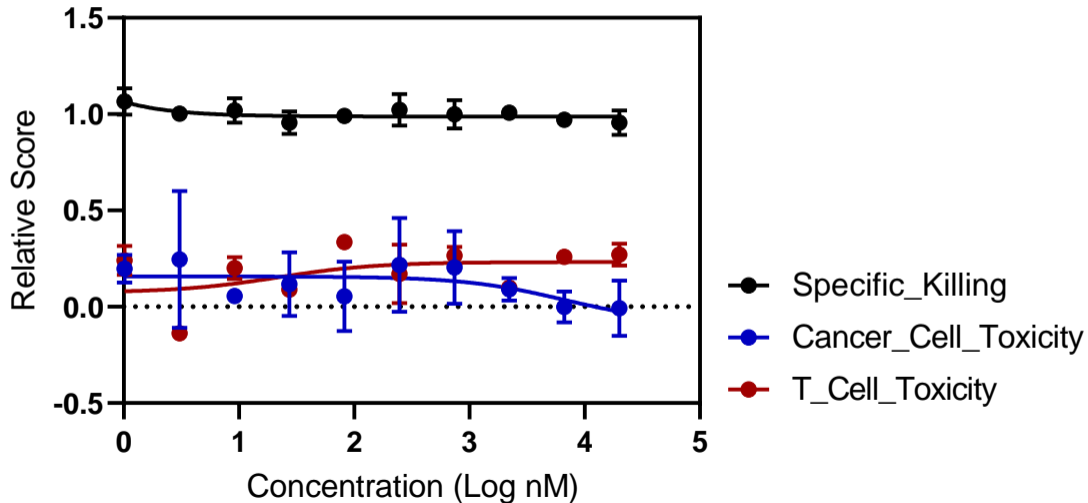



# AGI-5198

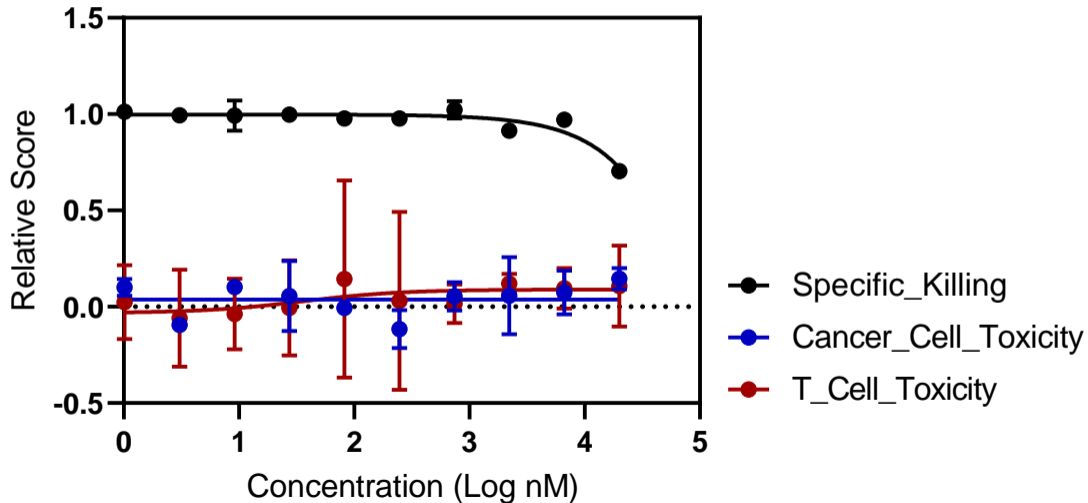

# AGI-6780

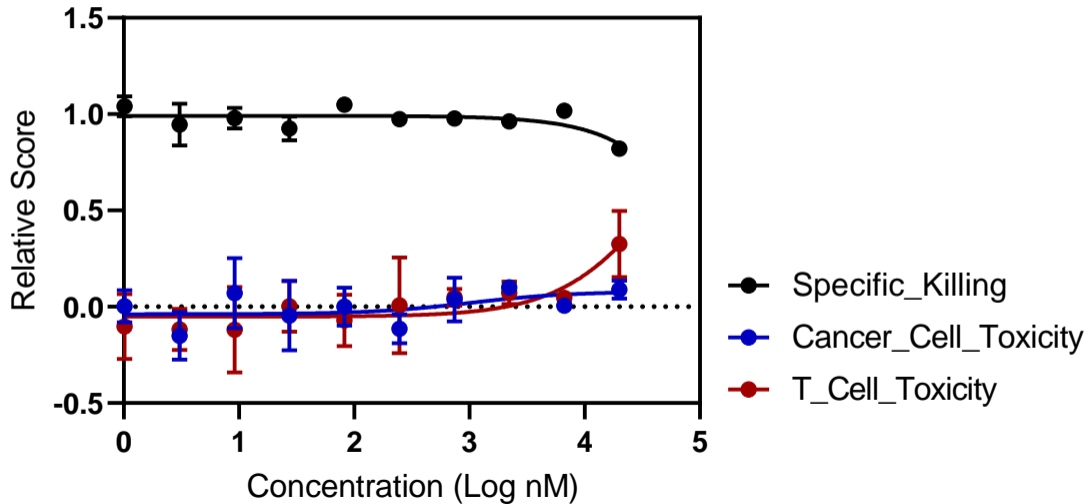

# AICAR

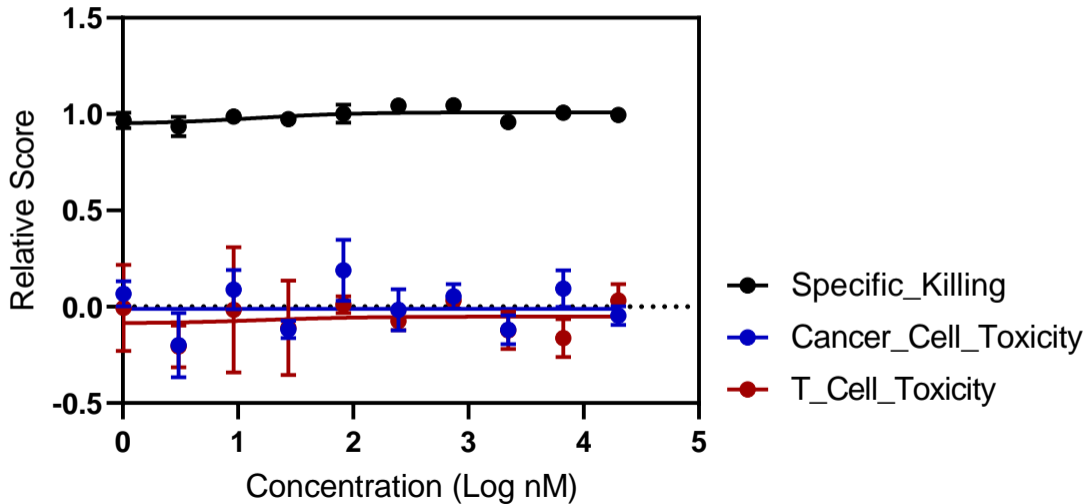

# Allopurinol Sodium

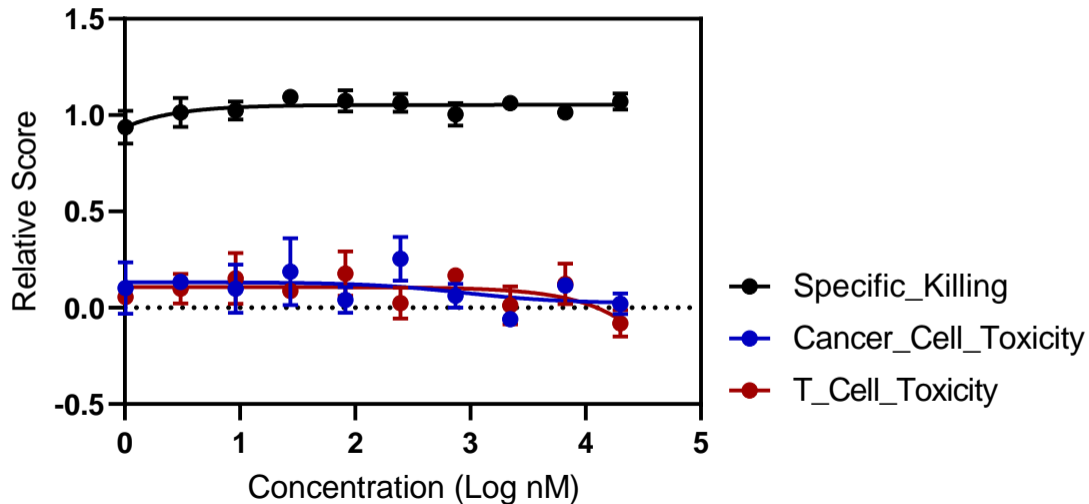

# Alrestatin

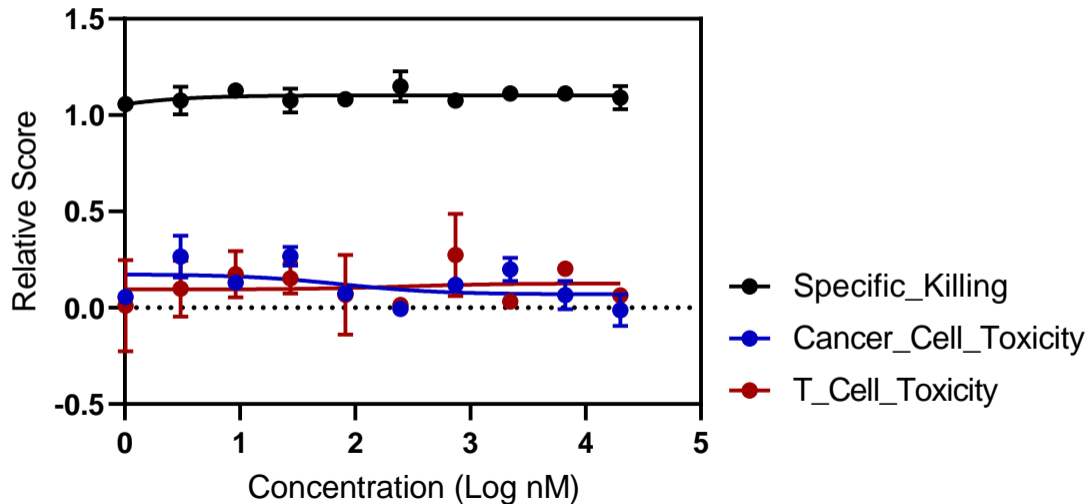

# Amifostine trihydrate

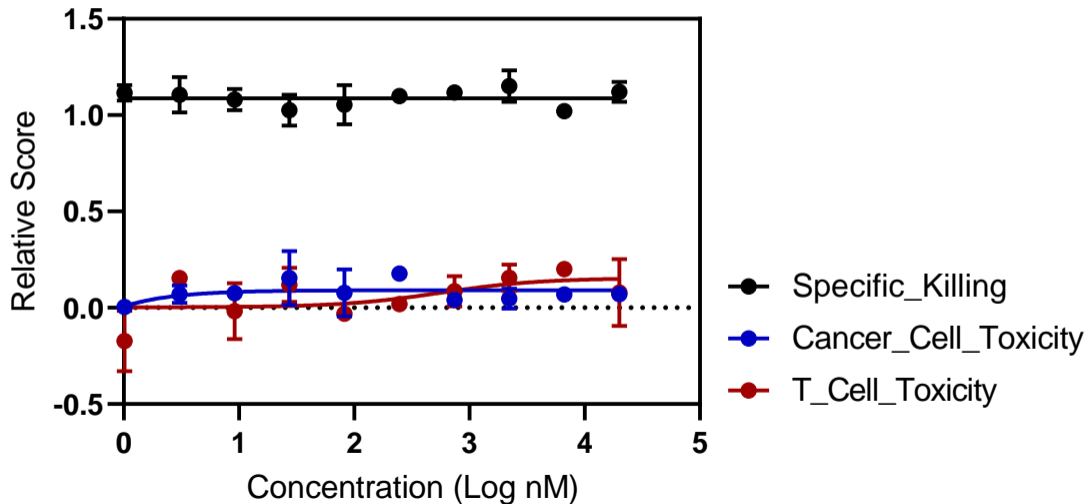

# Aminooxyacetate

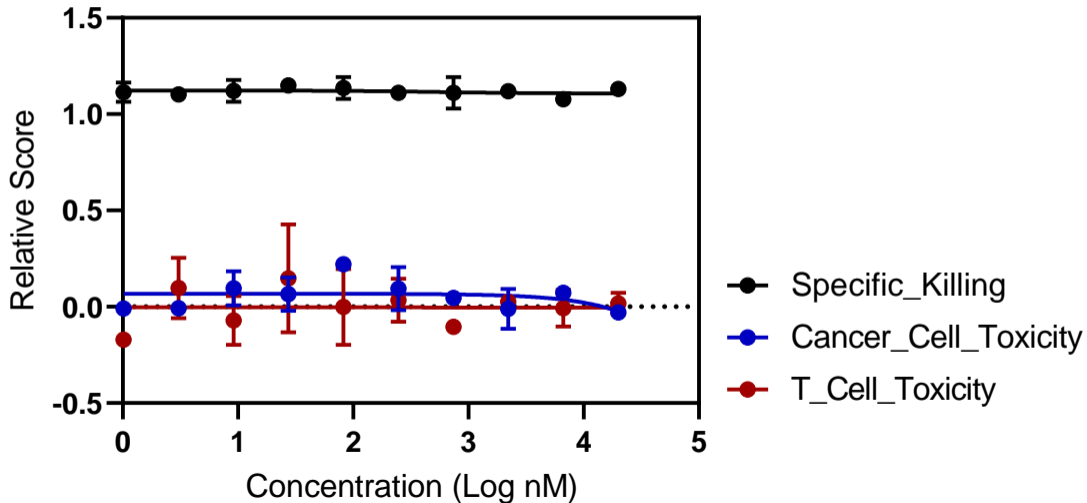

# Anastrozole

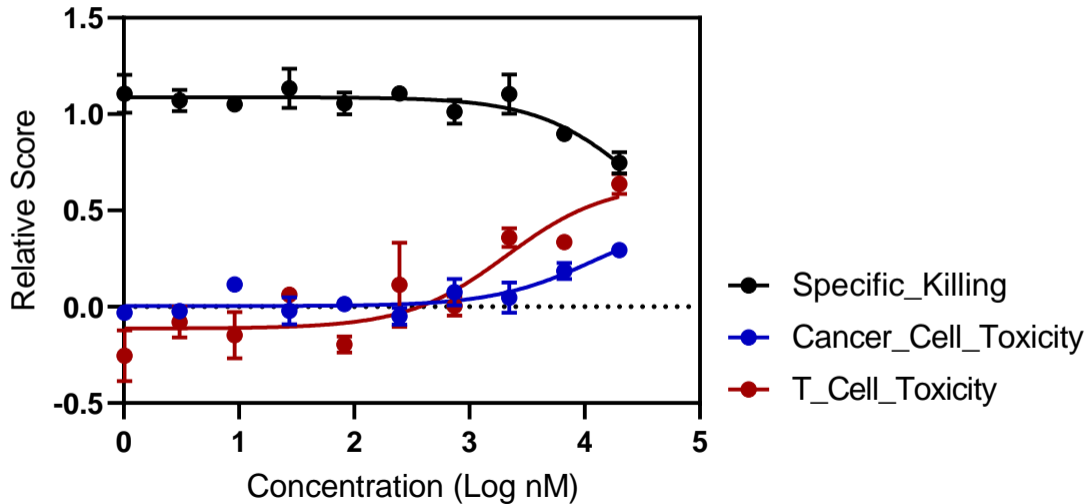



# Antimycin A

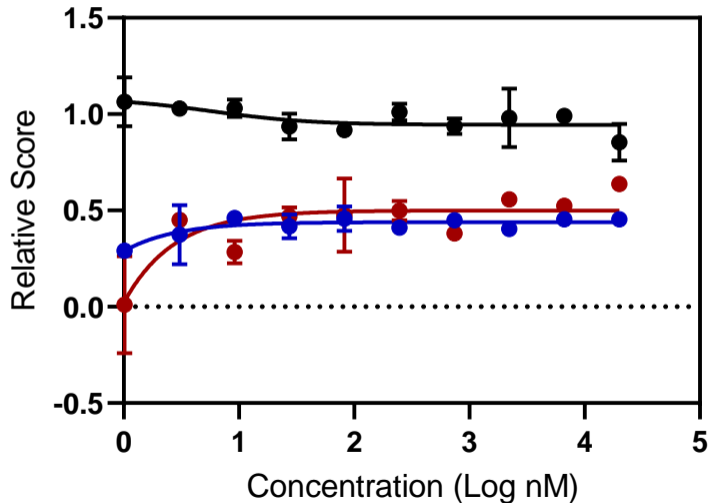

# Apigenin

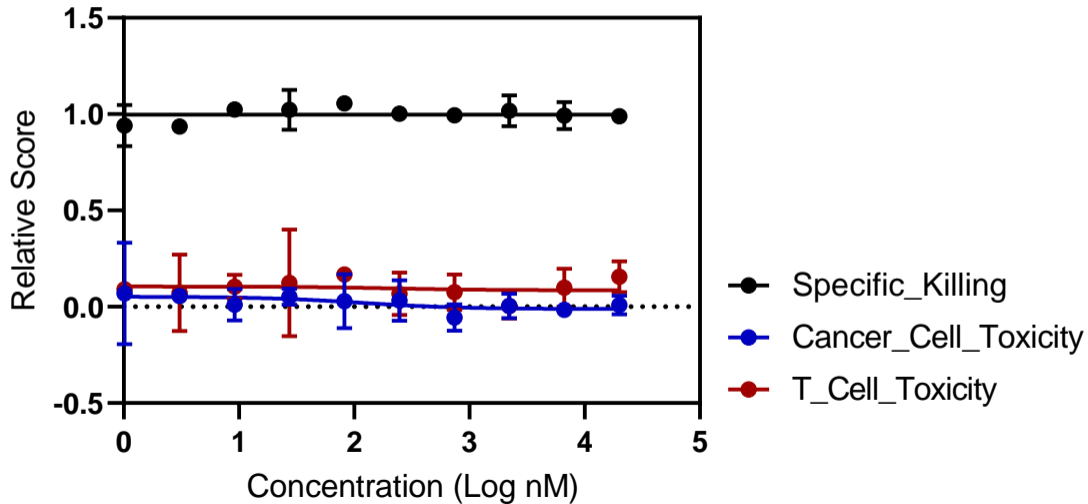

# AP-III-a4 (ENOblock) hydrochloride

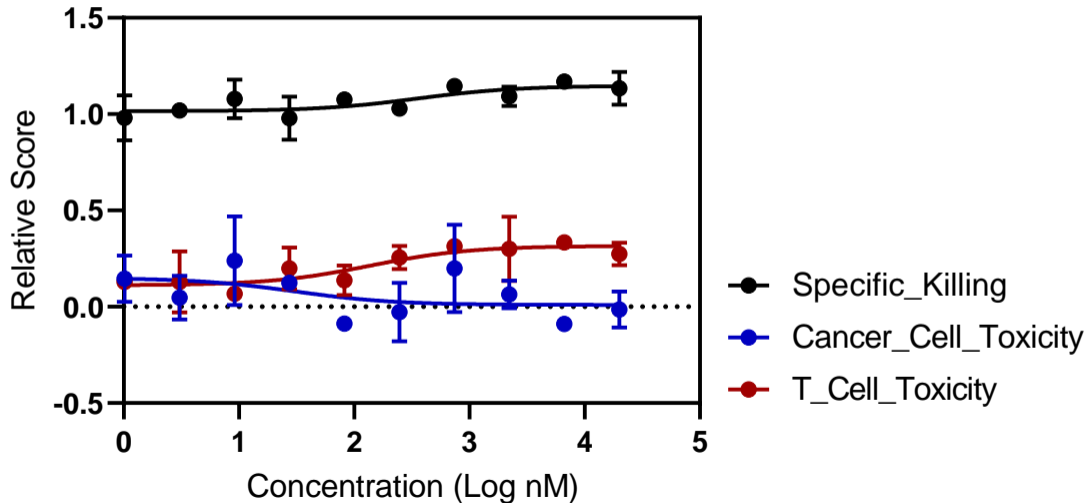

# AR-C155858

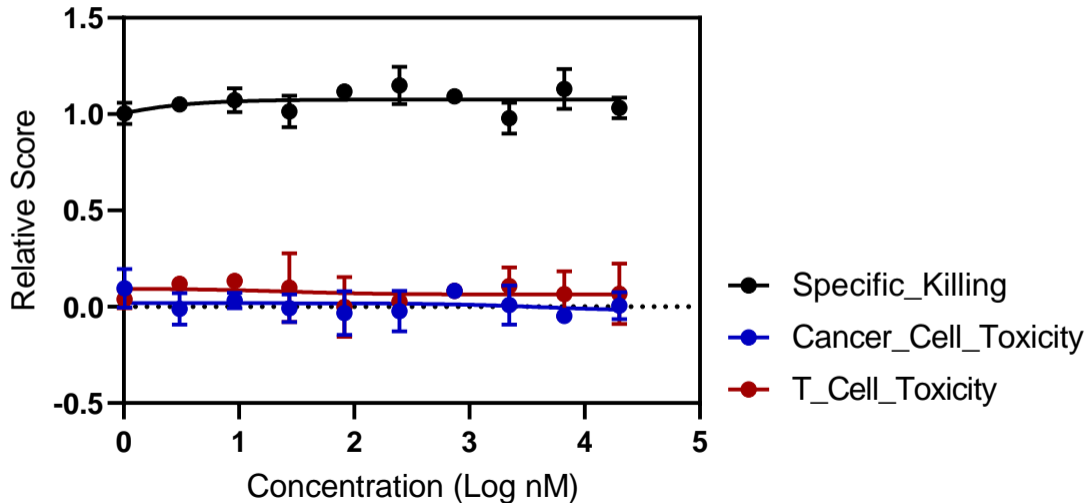

# Artemisinin

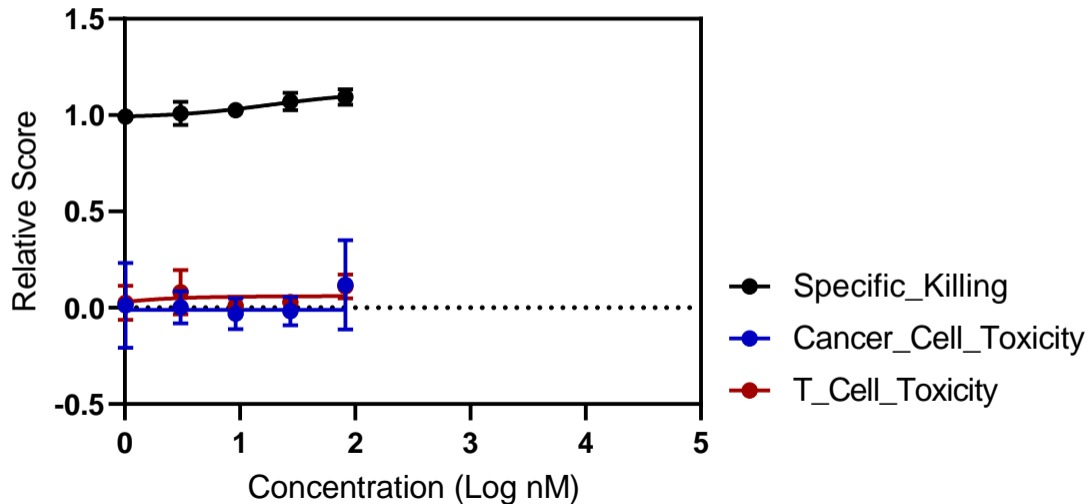

# Artesunate

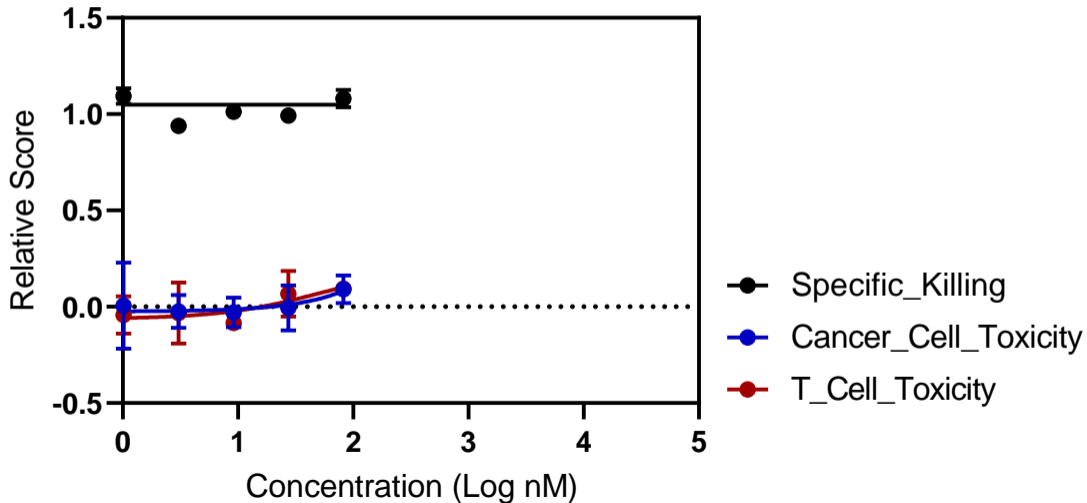

# Aspirin

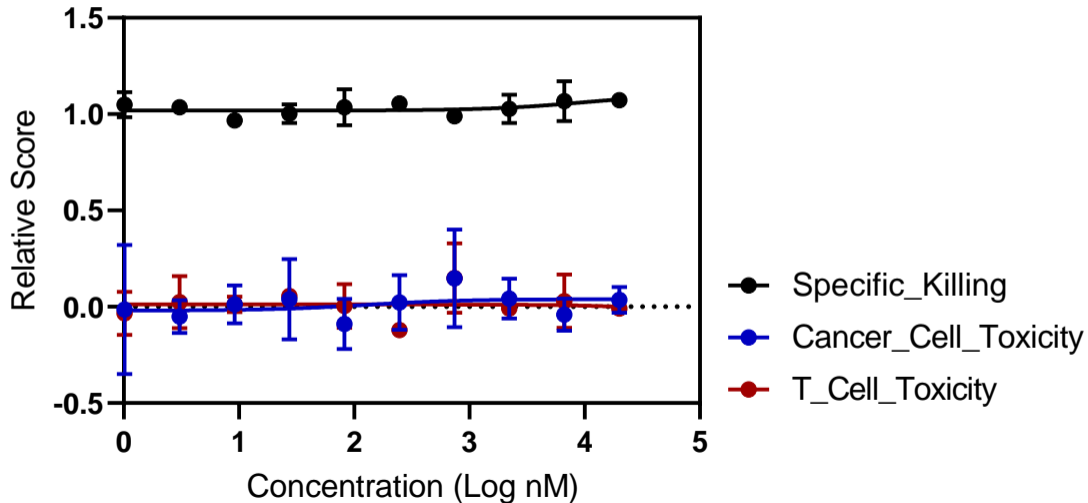

# ATN-224

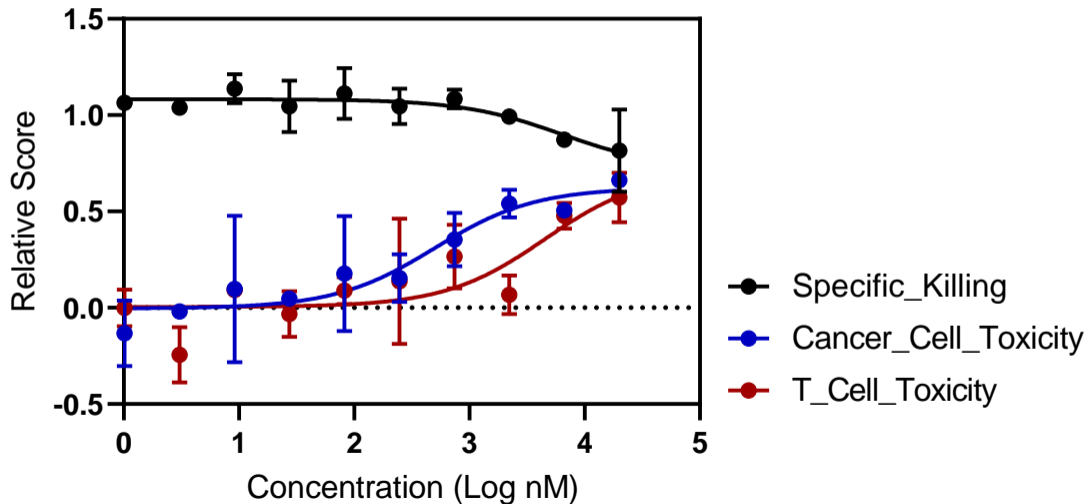



# Auranofin

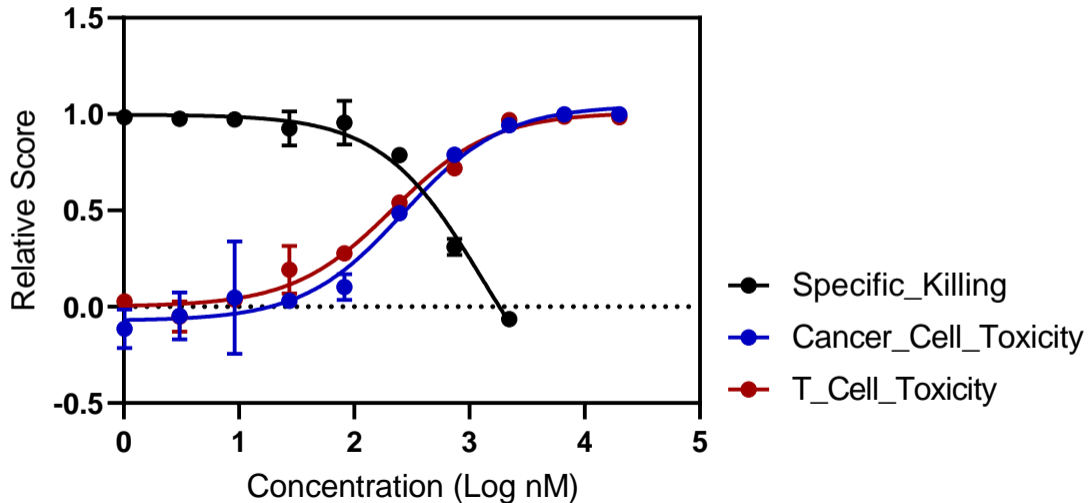

# Aurothioglucose

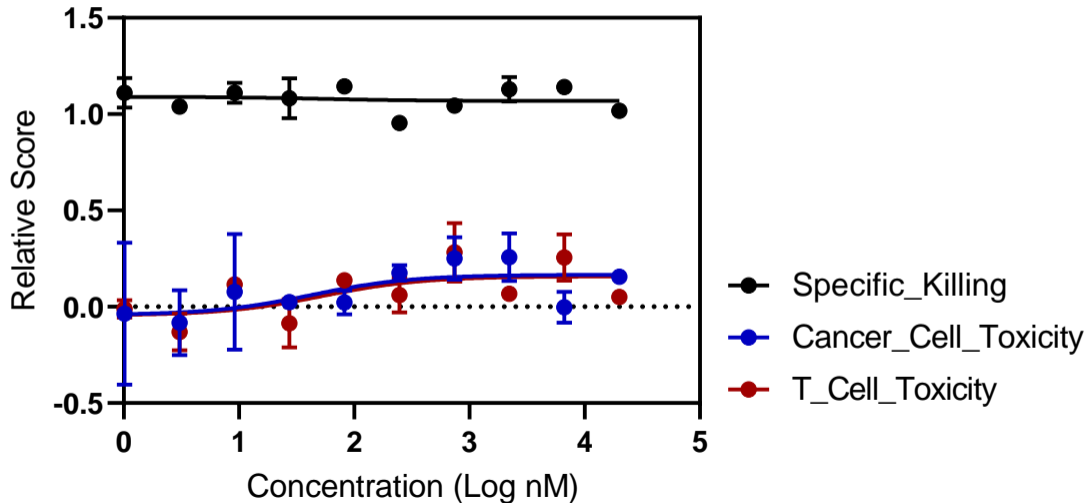

# Avasimibe

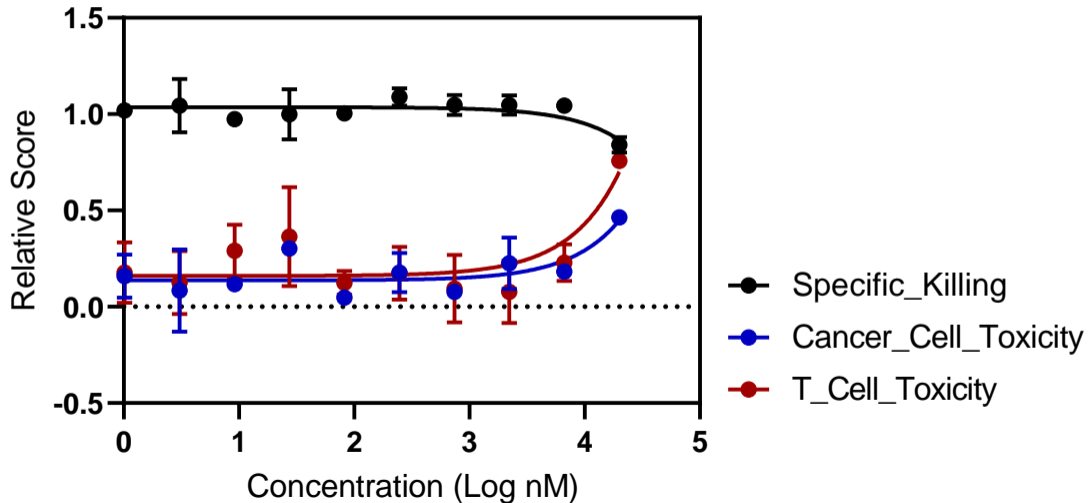

# Azaserine

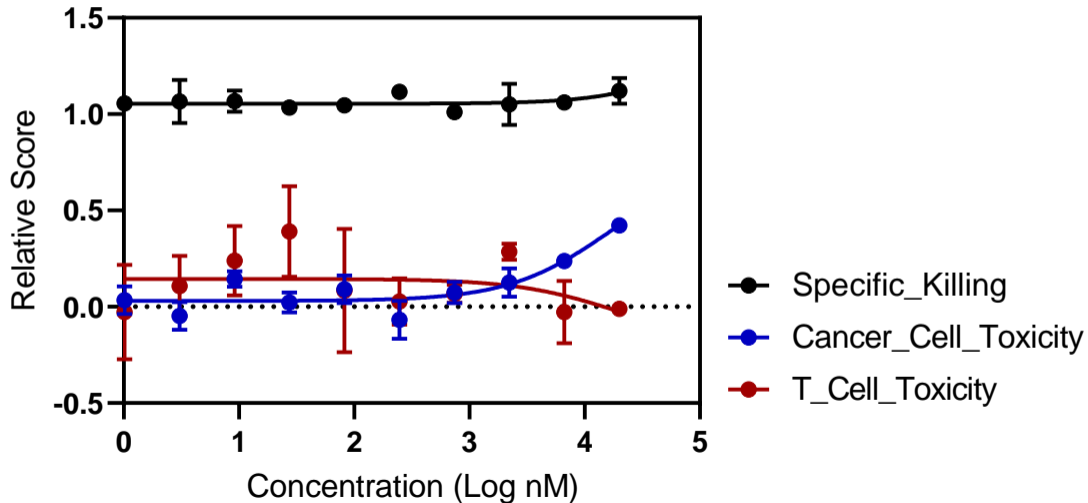

# AZD3965

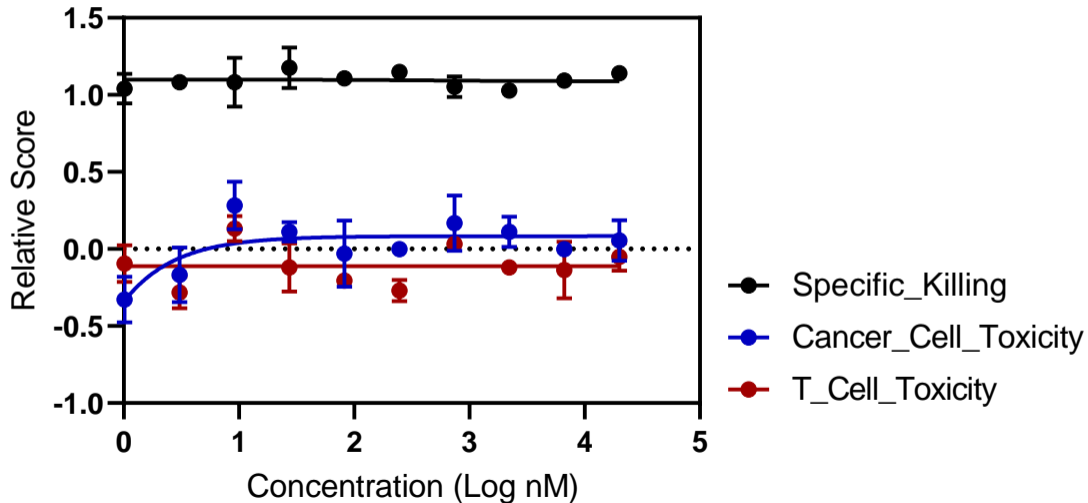

## beta-Lapachone

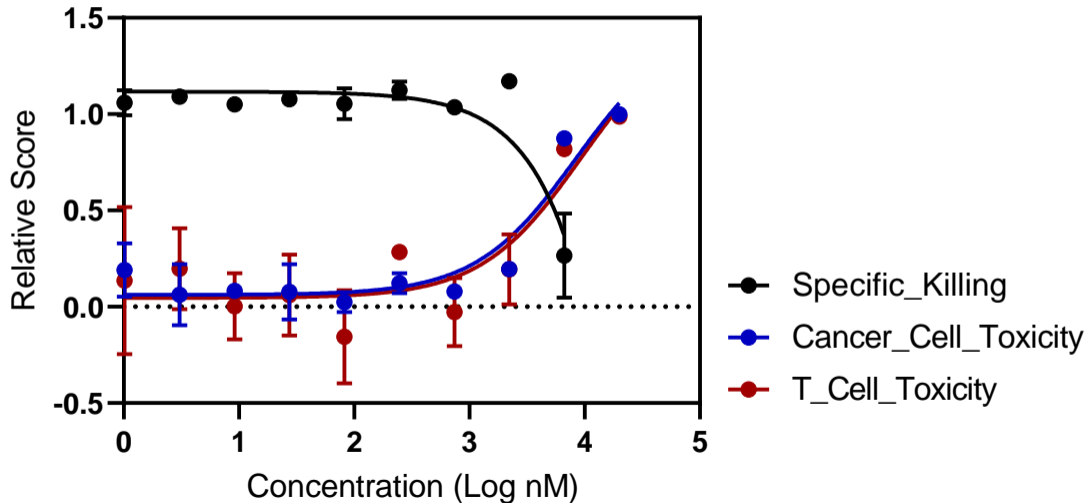

# Betulinic acid

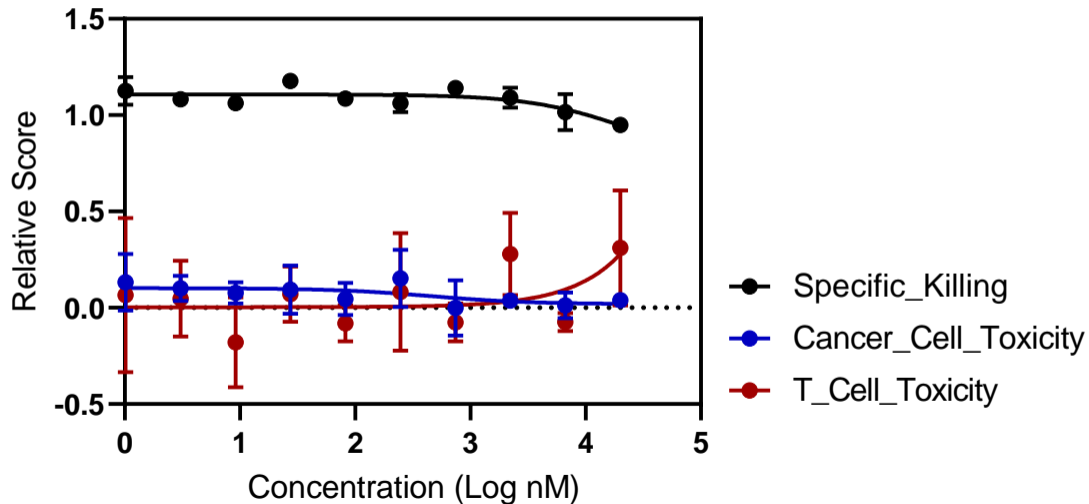

# BMS 309403

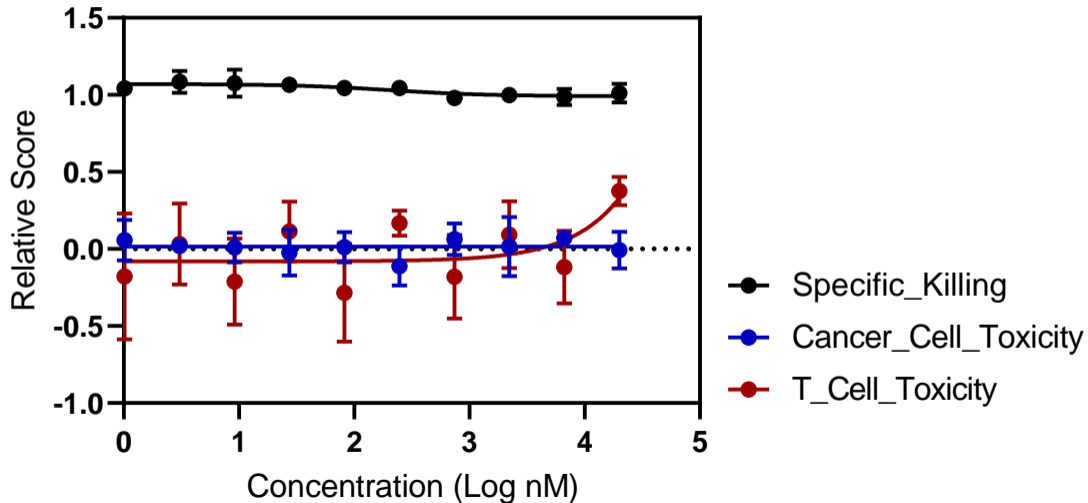



# BMS-303141

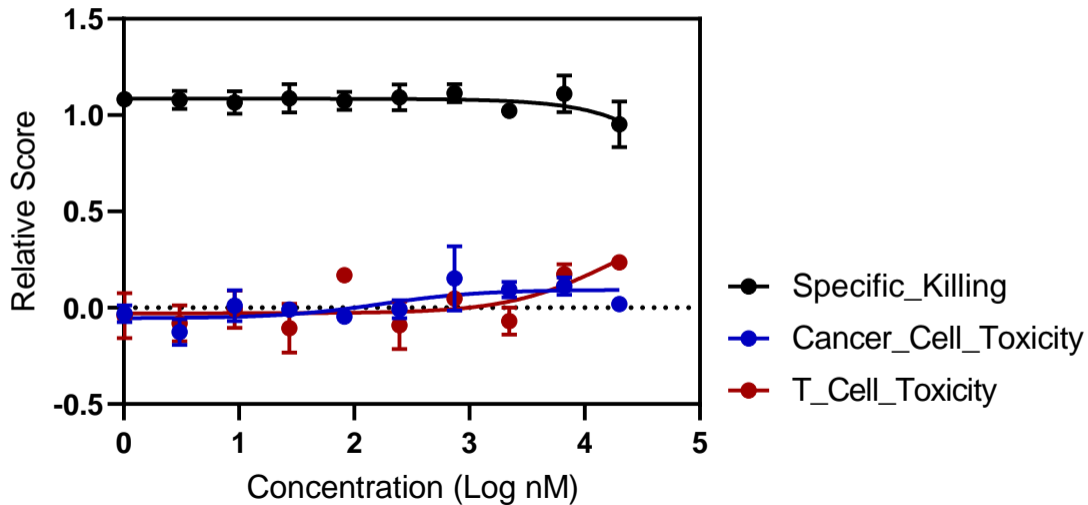

# BPTES

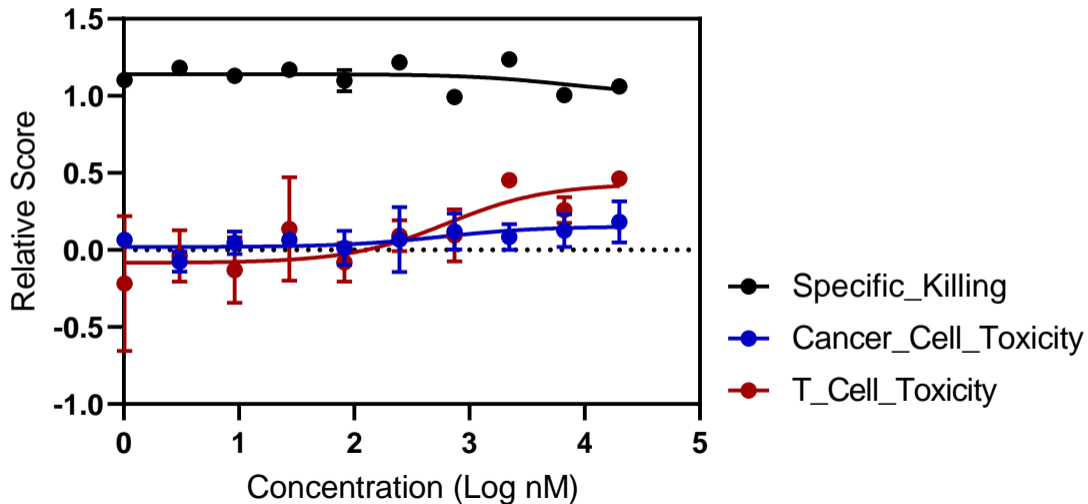

# BRD56491

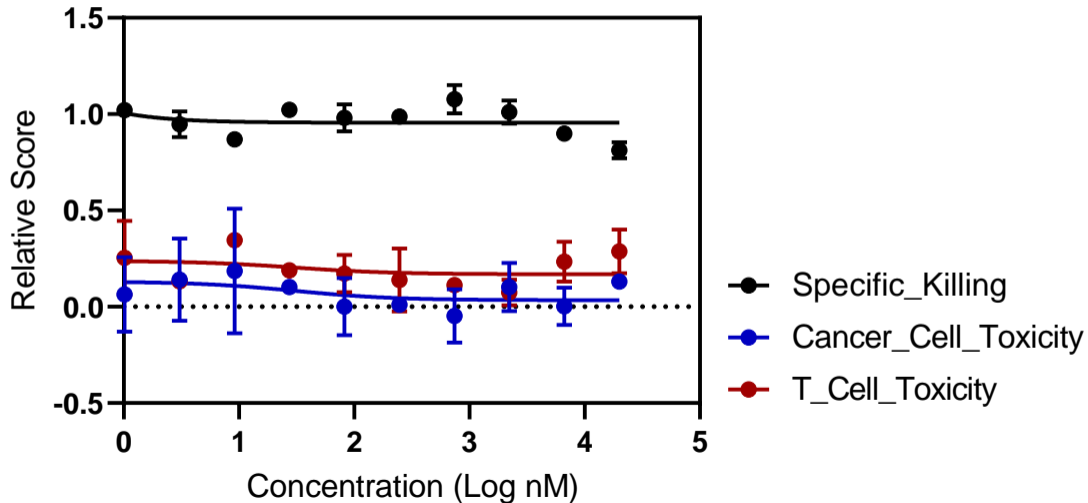

# Brequinar sodium salt hydrate

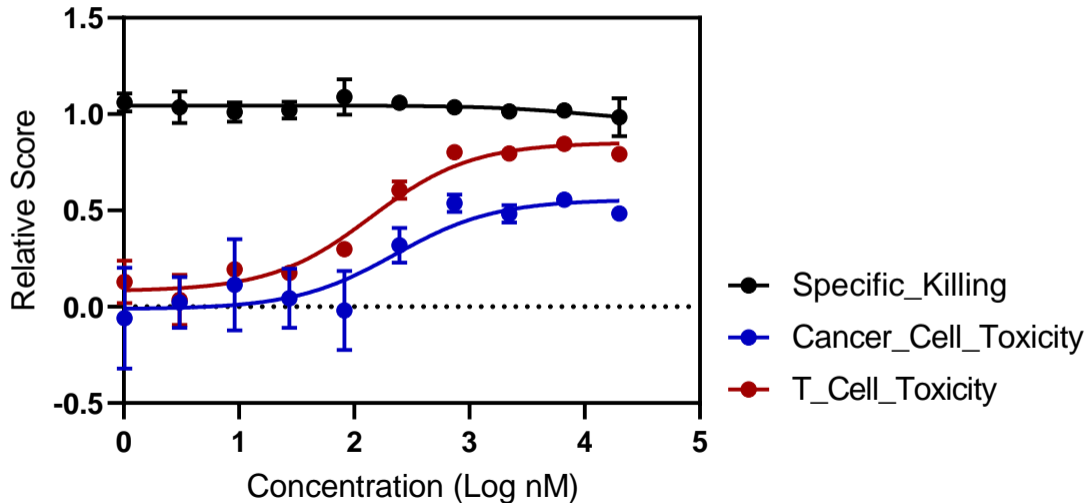

## Bromopyruvic acid

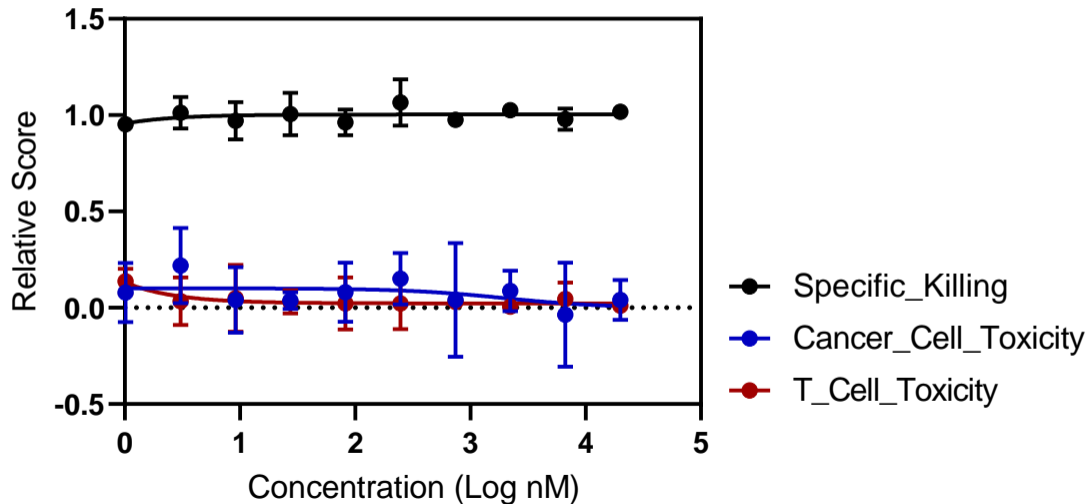

# Bumetanide

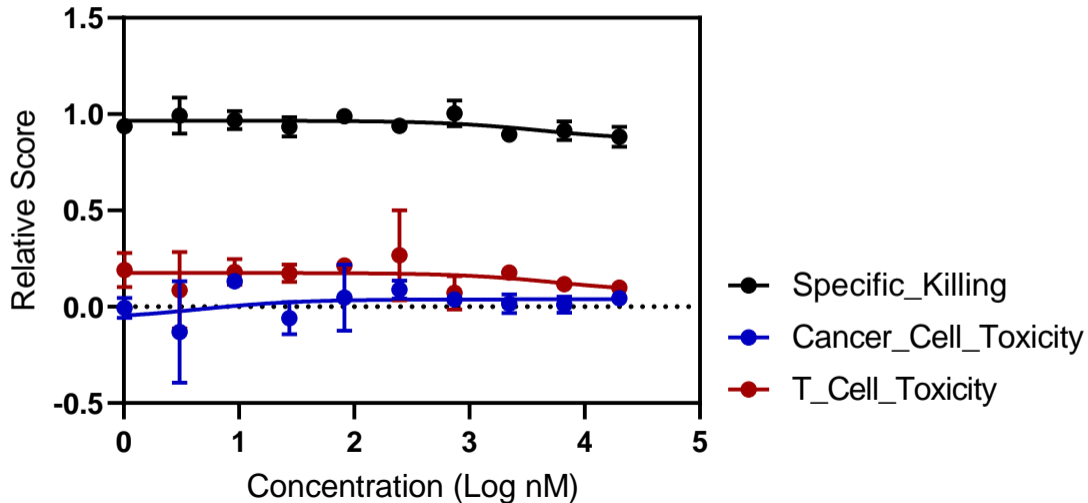

# Butenafine HCl

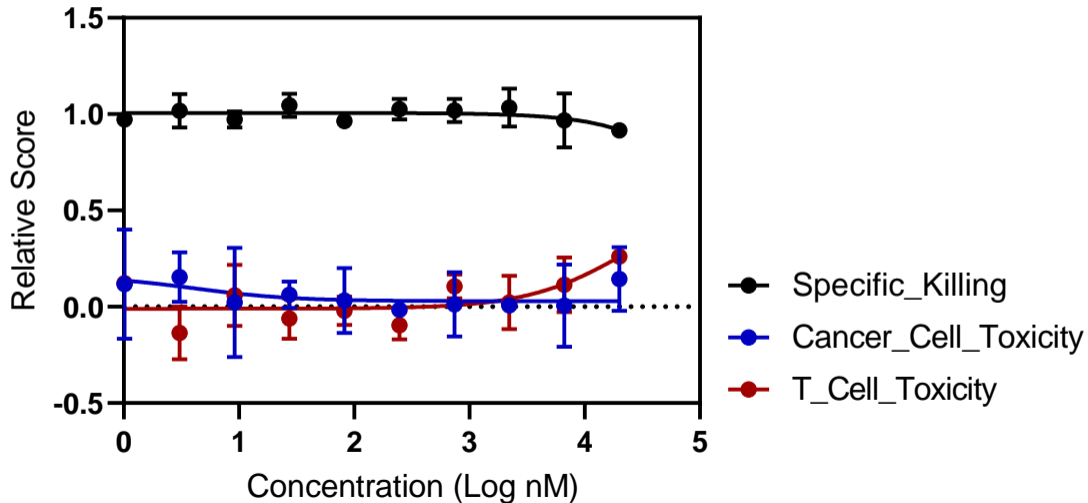

# C 75

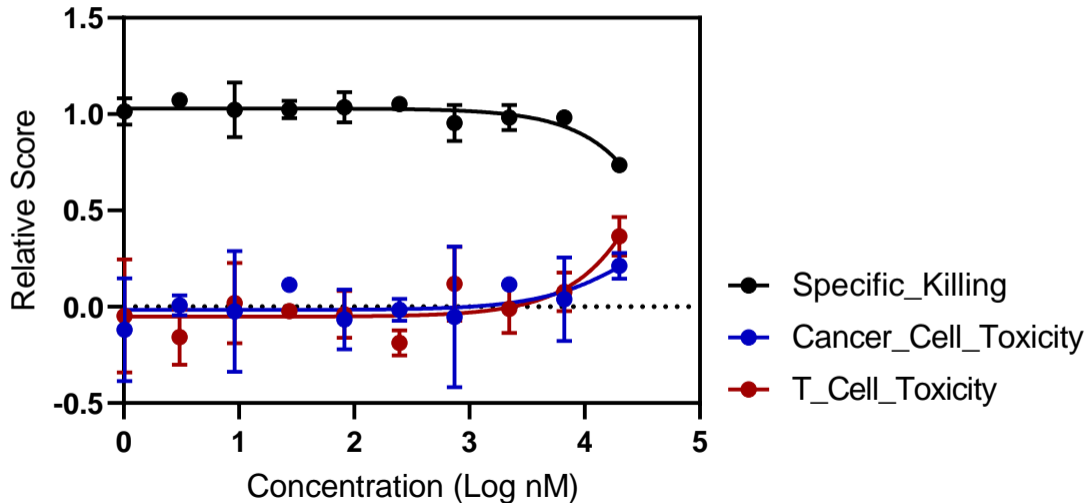



# Canagliflozin

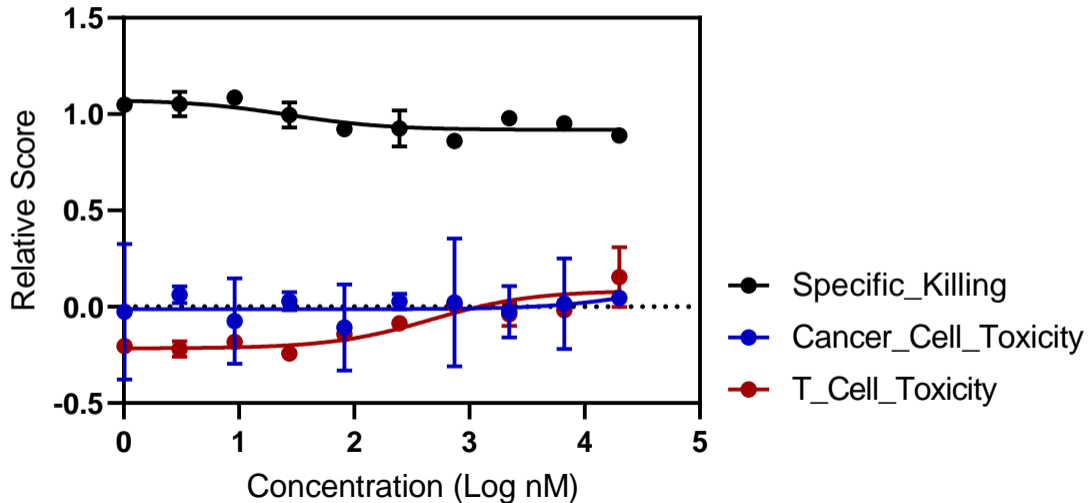

# Castanospermine

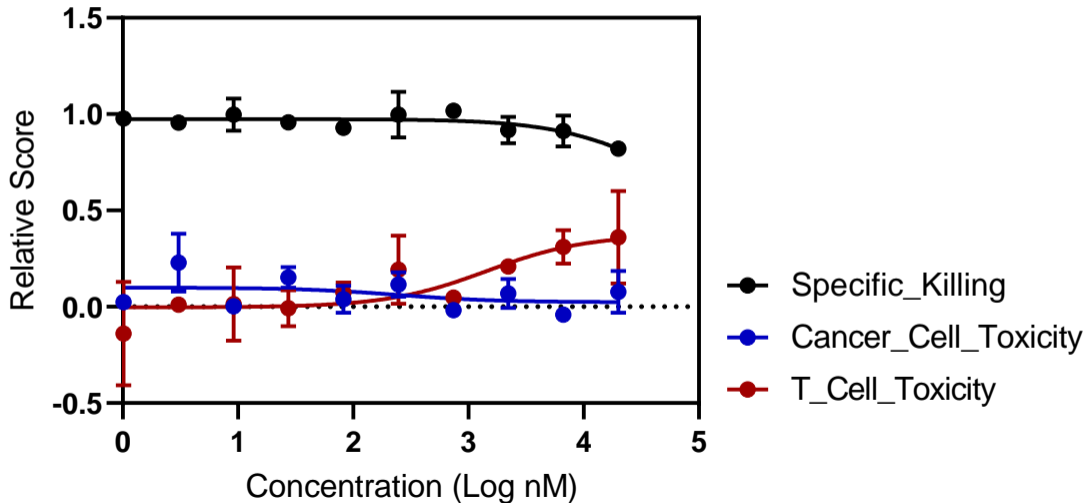

# CB-839

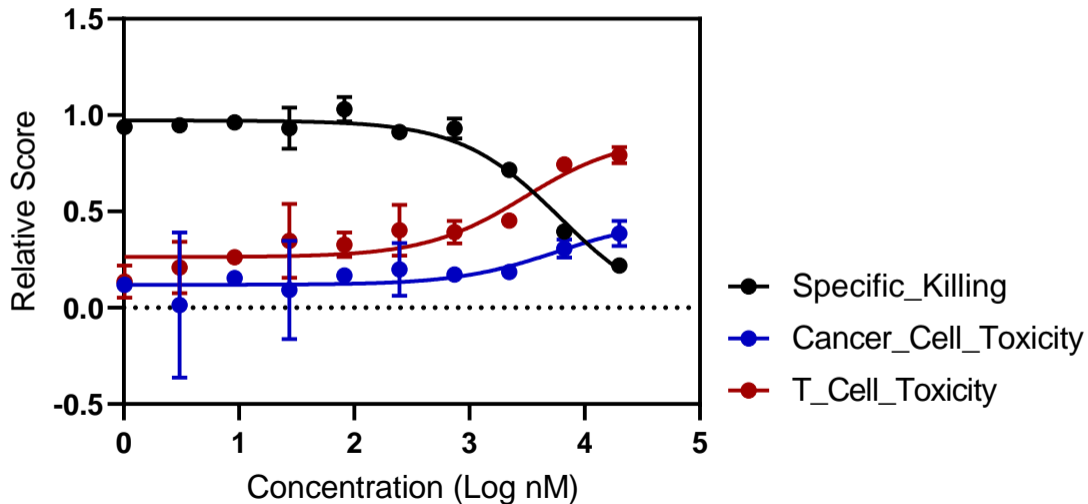

# CB-5083

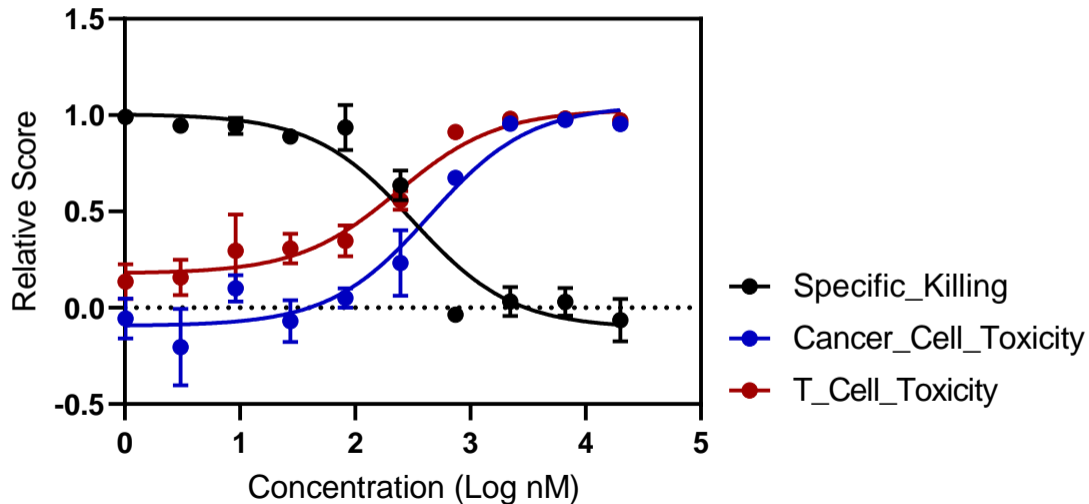

# CBR 5884

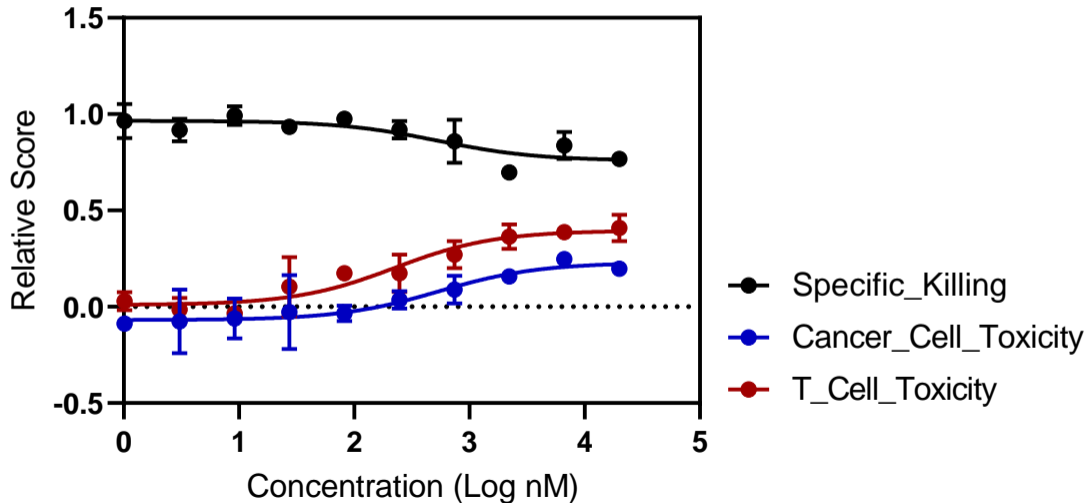

# CCCP

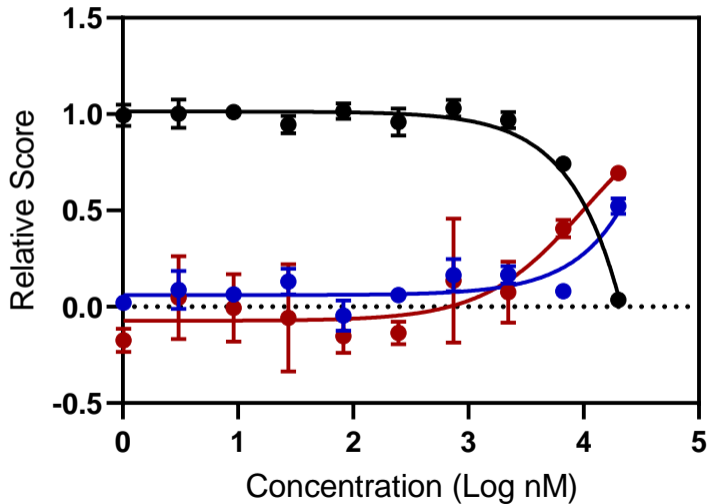

- Specific\_Killing
- Cancer\_Cell\_Toxicity
- T\_Cell\_Toxicity

# CCF642

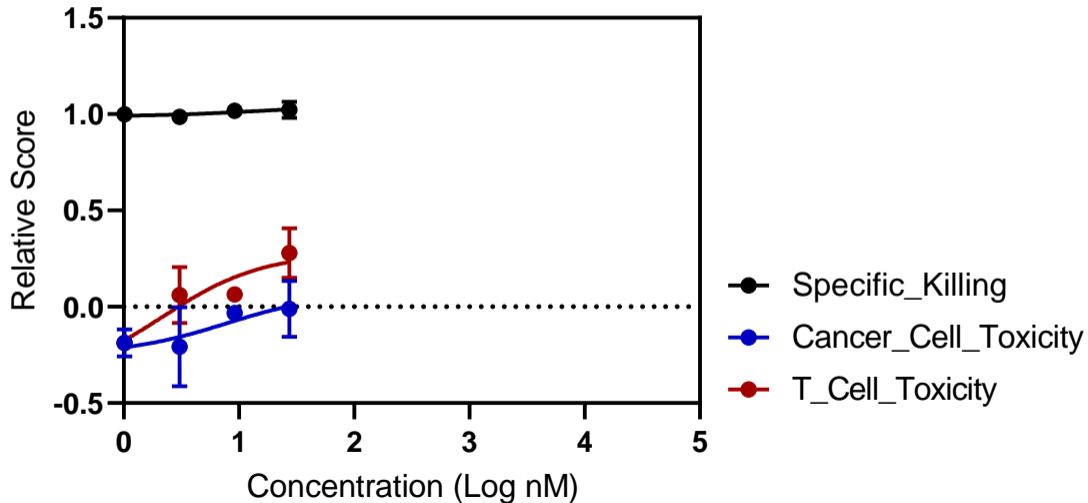

# CD 437

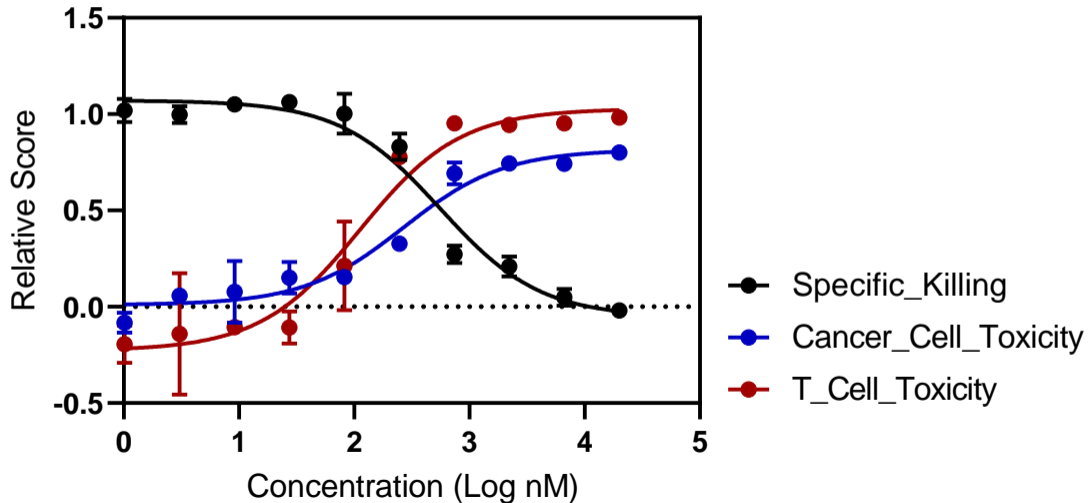



# Celecoxib

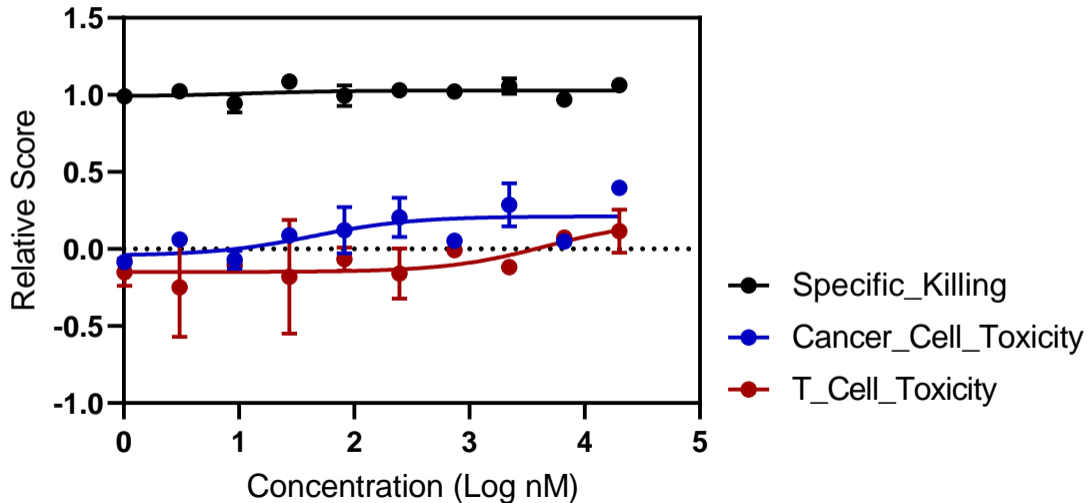

# Cerulenin

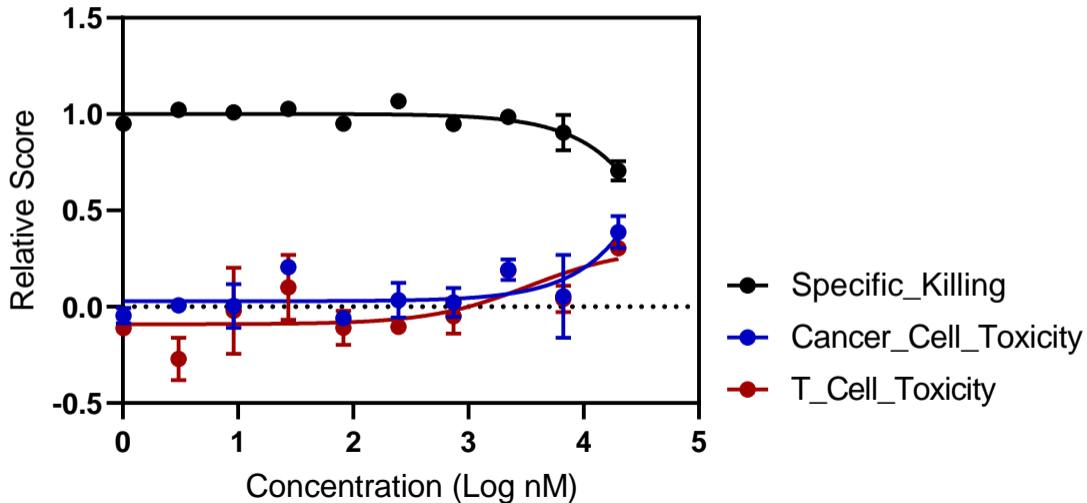

# Cetilistat

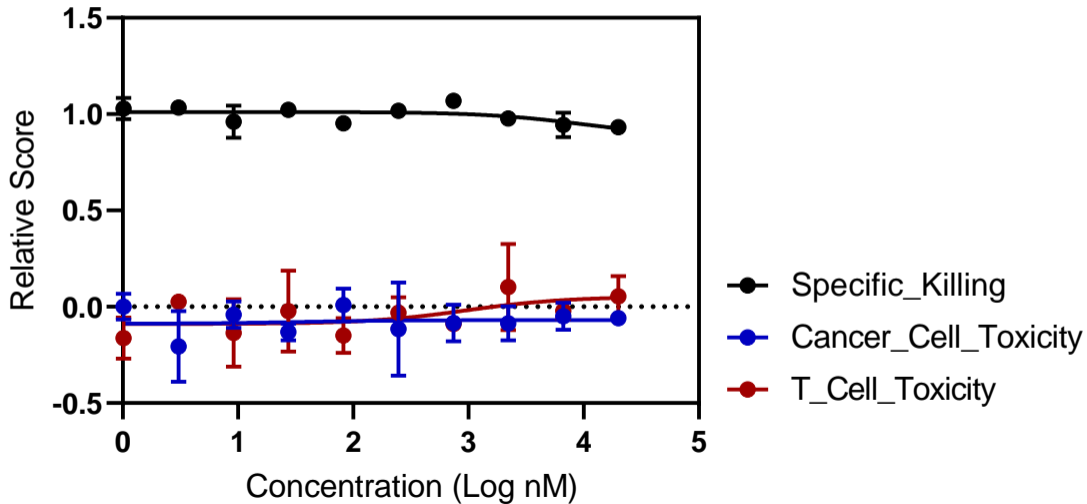

# CGP-37 157

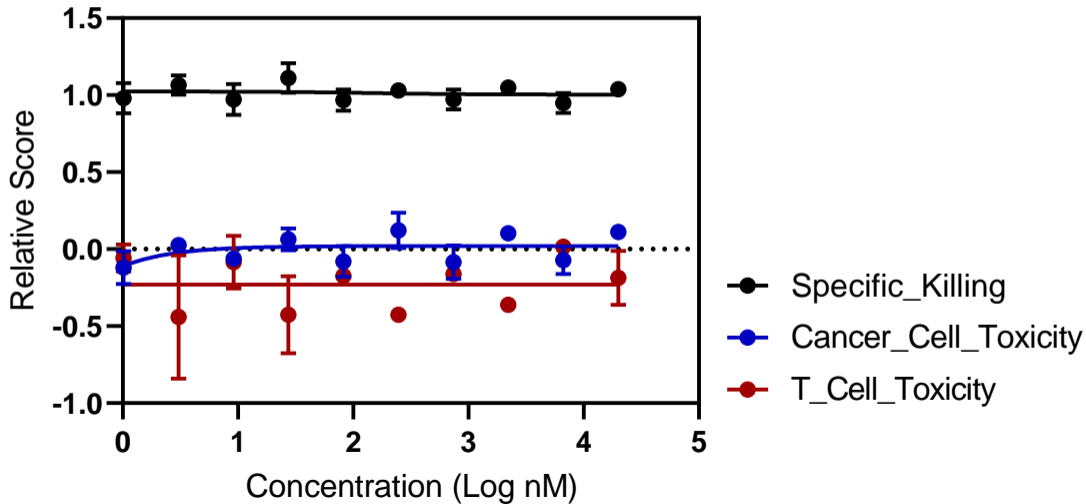

# Chaetocin

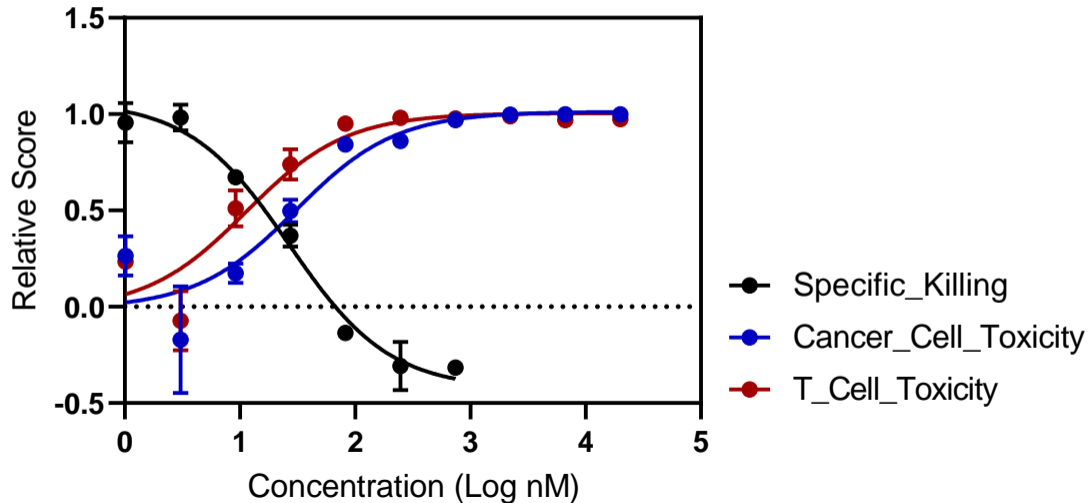

# CHC

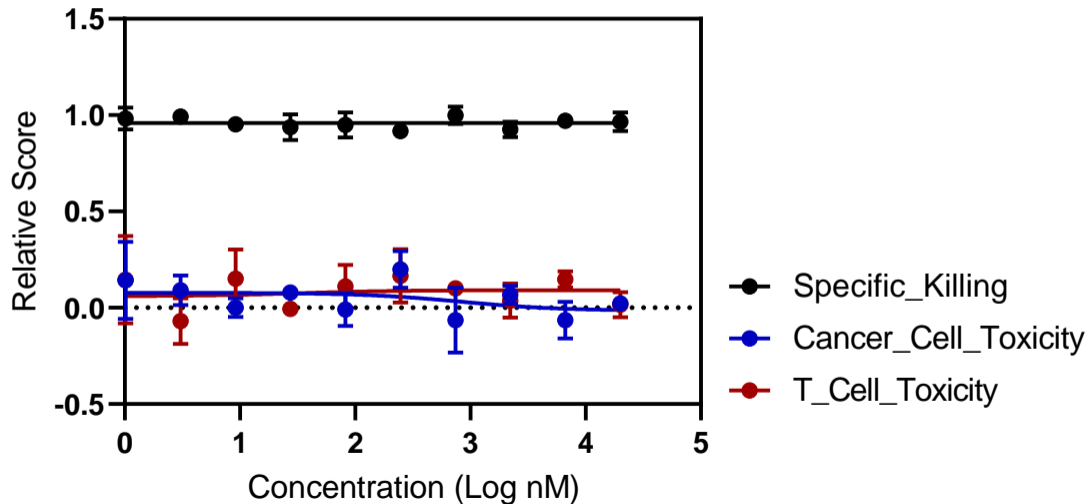

# Chloramphenicol

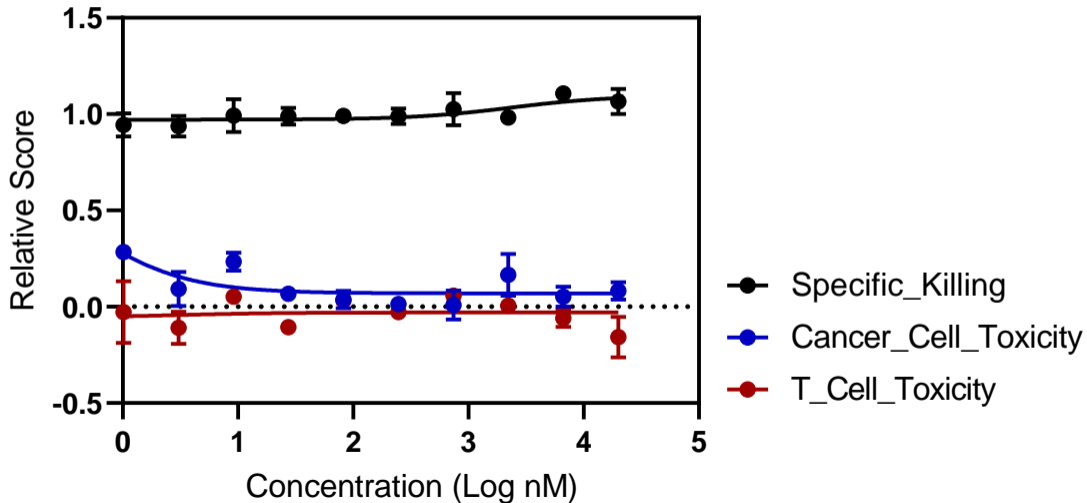

# Chlorogenic acid

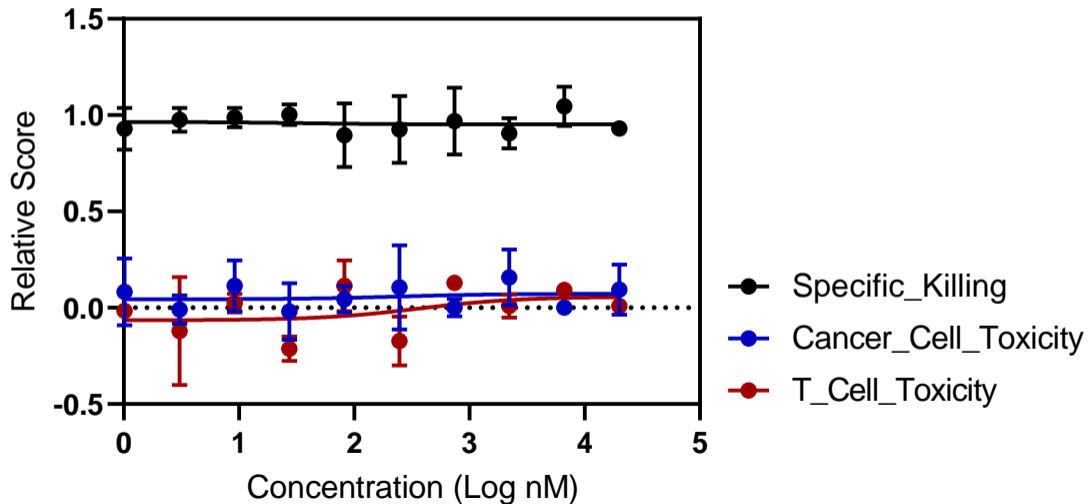



# CHR 2797

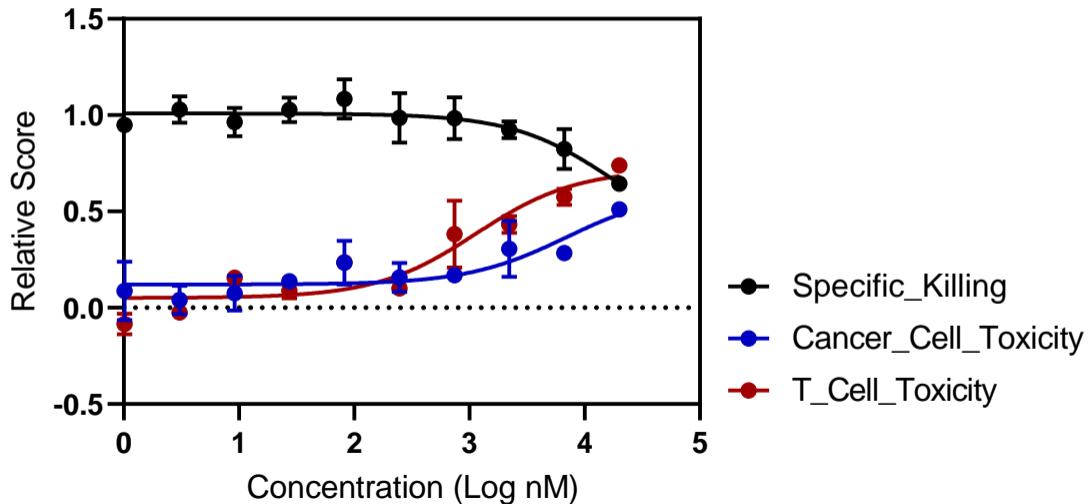

# CJ-13610

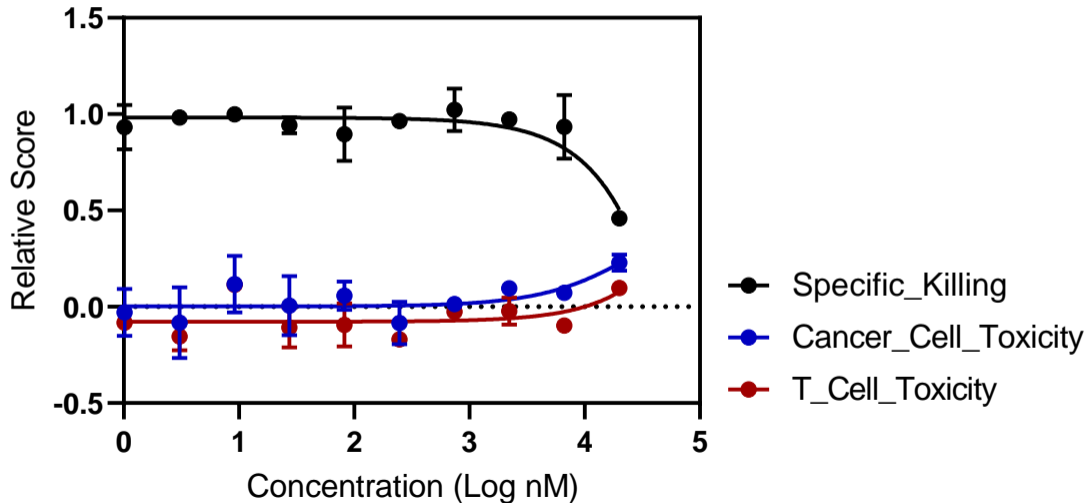

# Cladribine

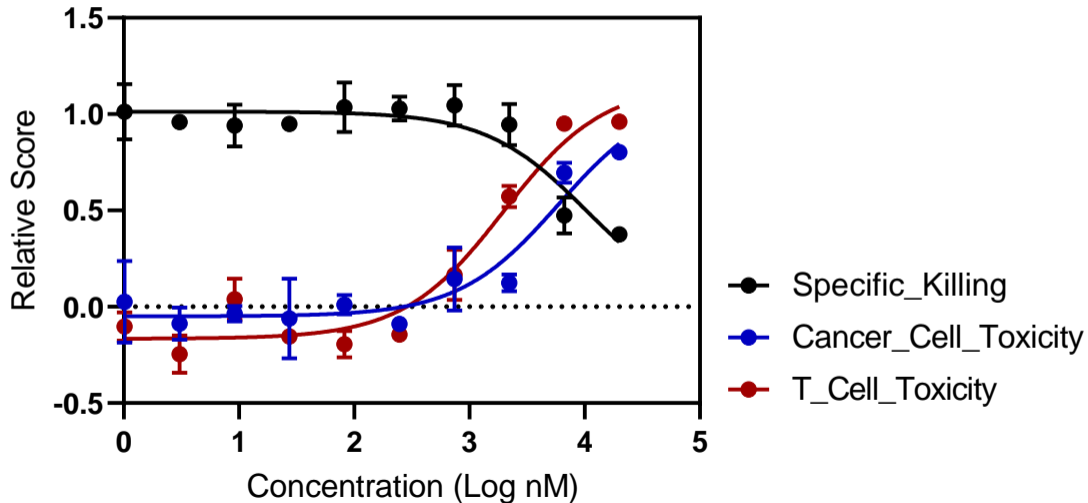

# CPI-613

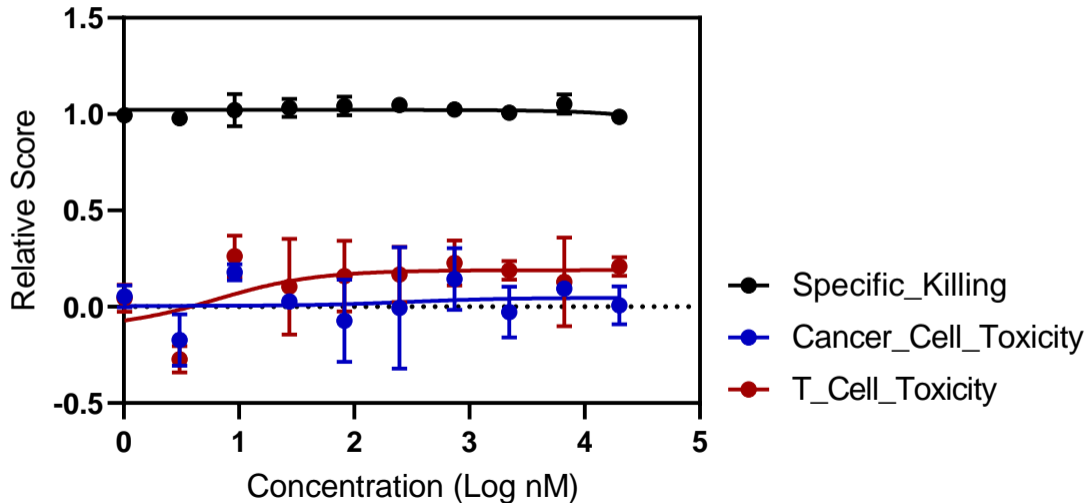

# Curcumin

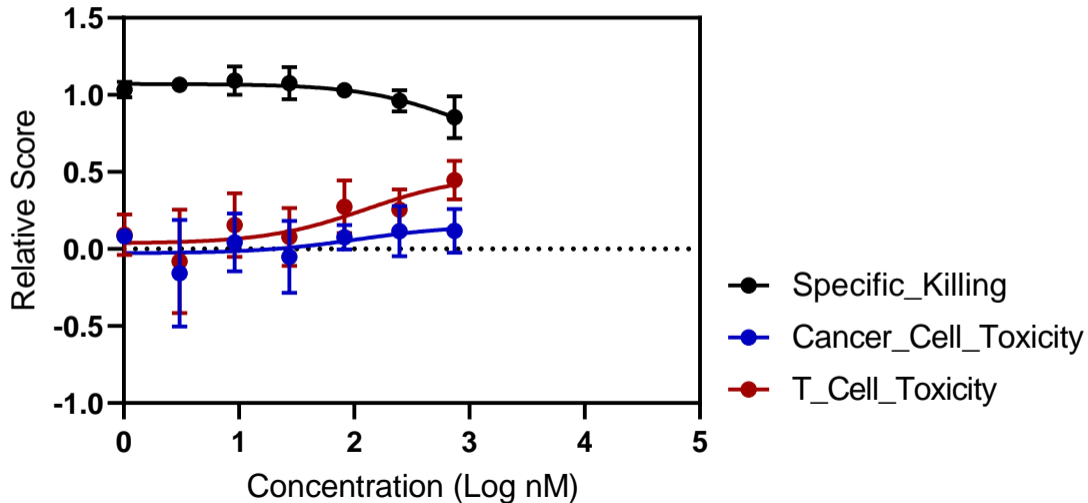

# Cyclopentenyl cytosine

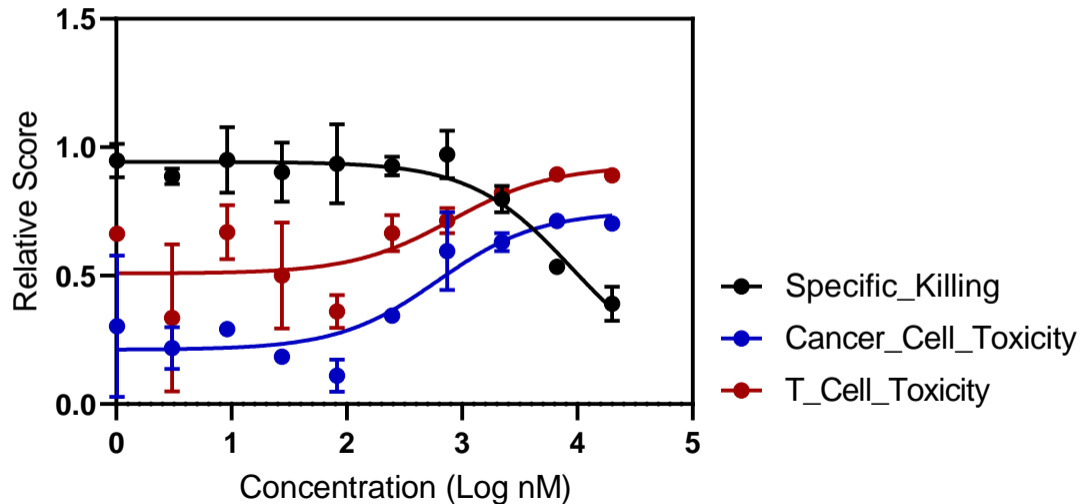

# Dapagliflozin

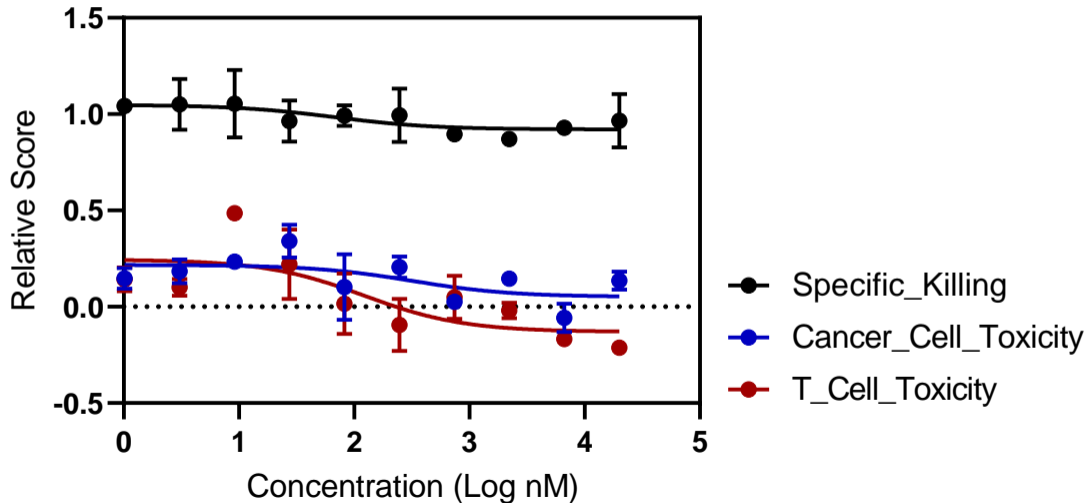

# DASA-58

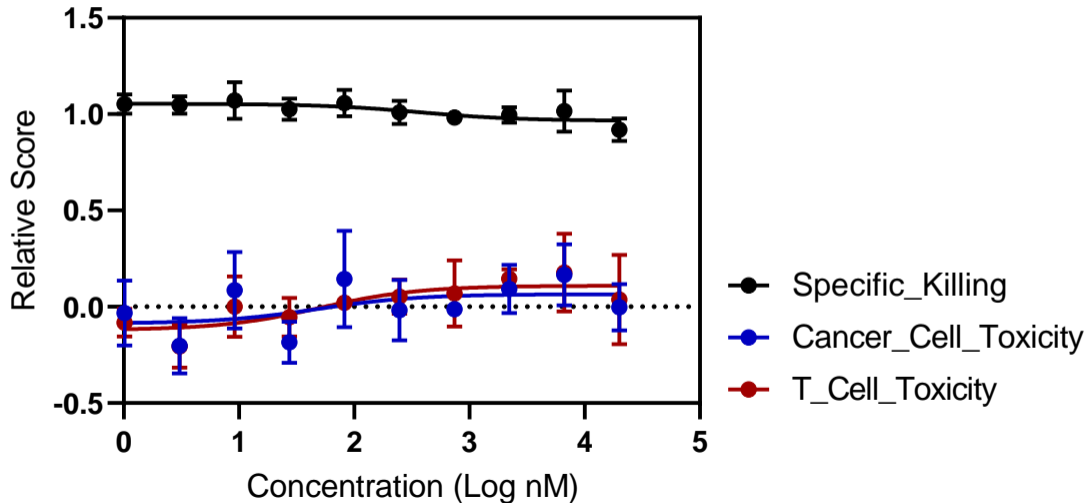



# DCA

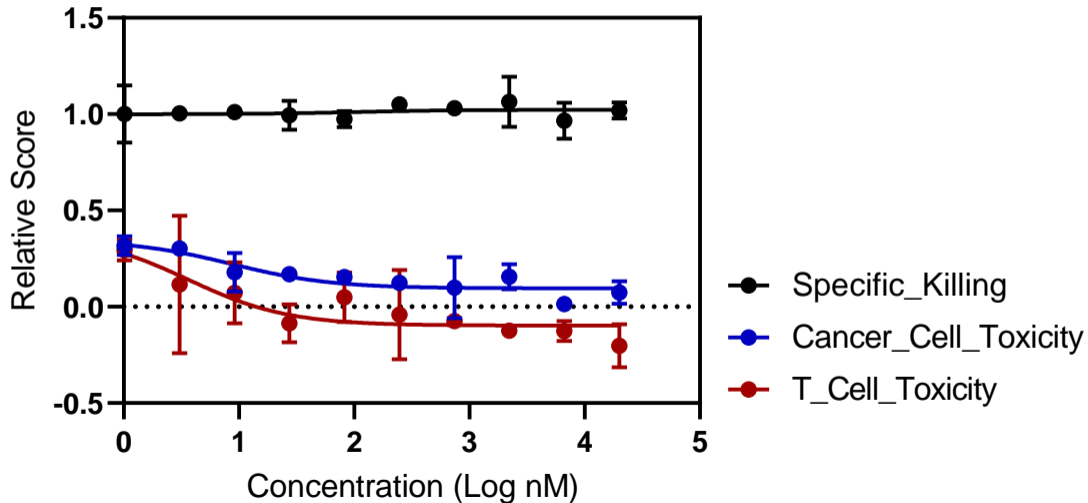

# Deferiprone

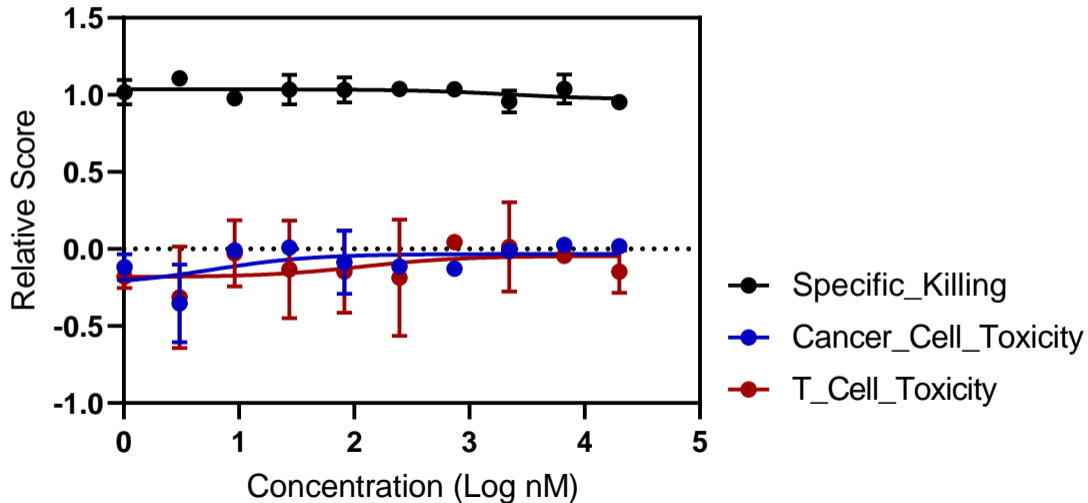

# Digitoxin

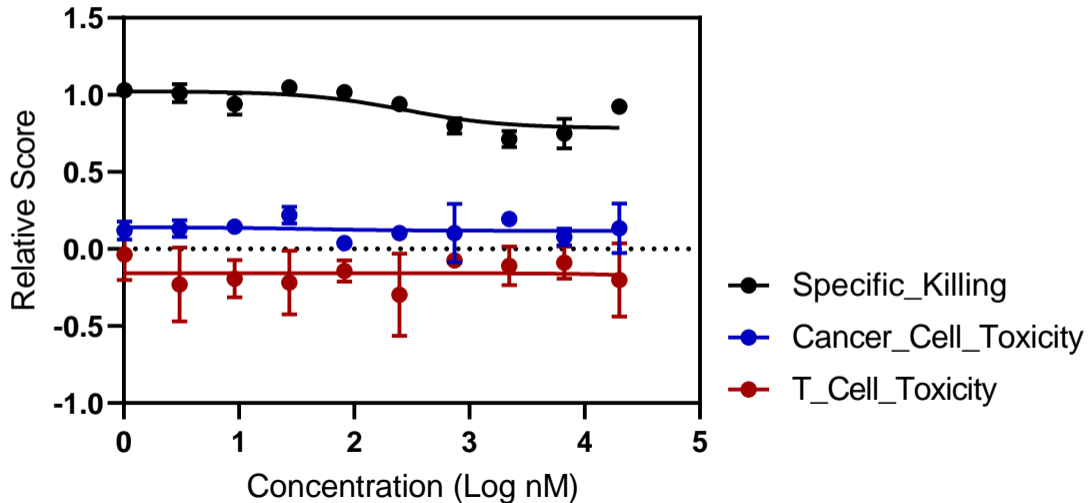

# Dimesna

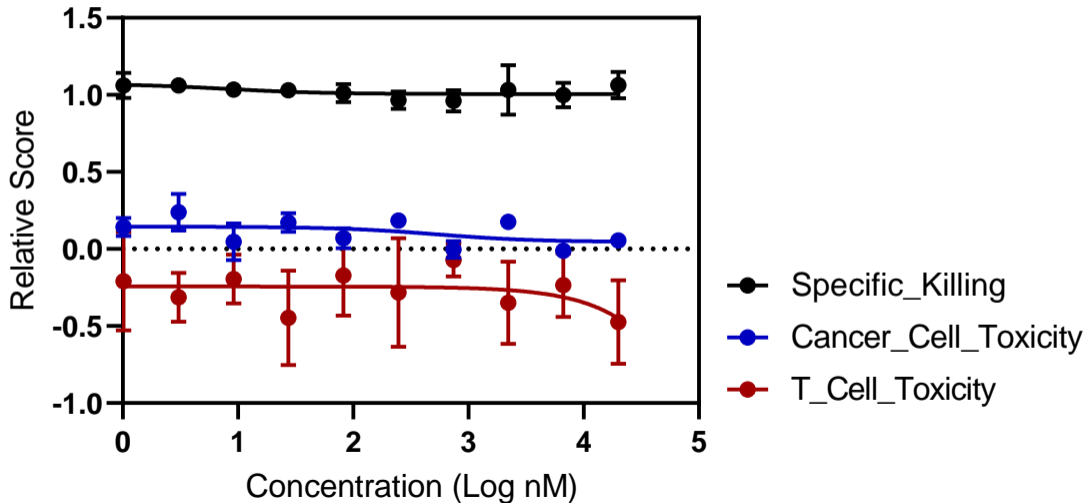

# Diphenyleneiodonium chloride

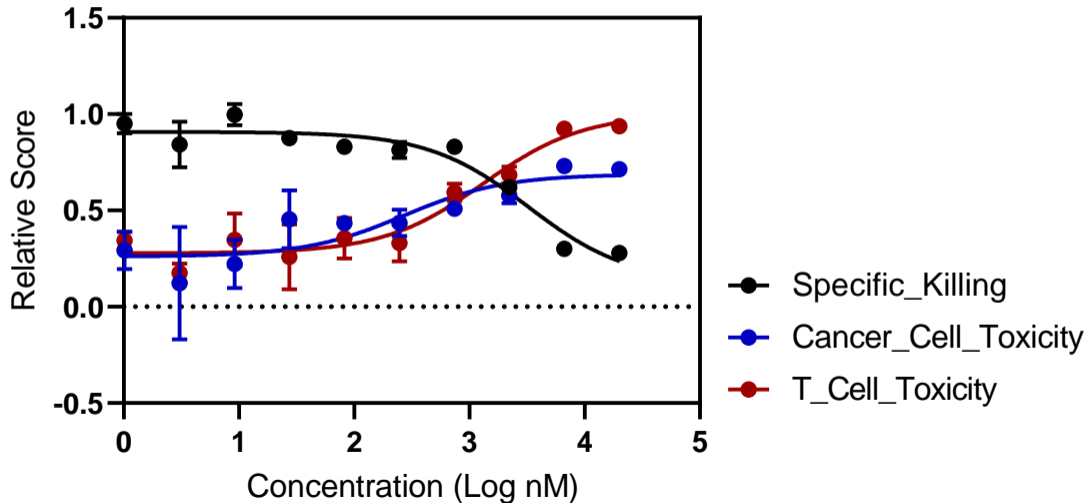

# Dipyridamole

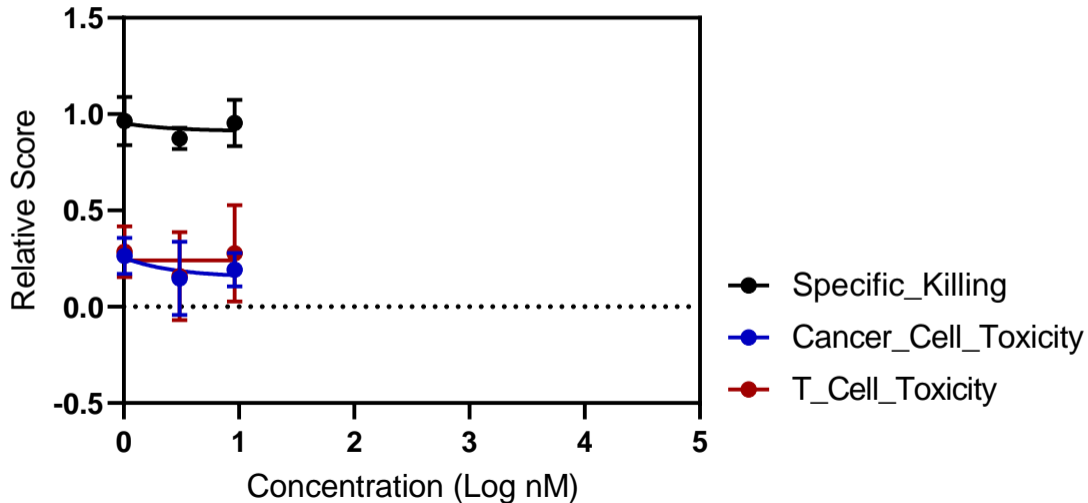

# Disulfiram

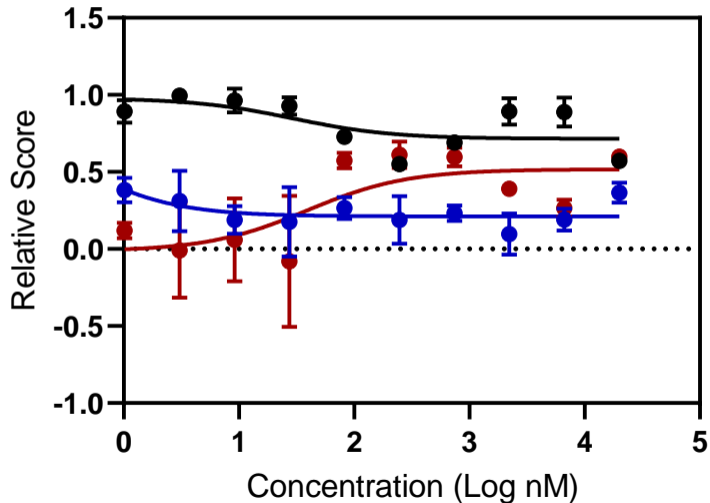

- Specific\_Killing
- Cancer\_Cell\_Toxicity
- T\_Cell\_Toxicity

# DL--difluoromethylornithine (hydrochloride hydrate)

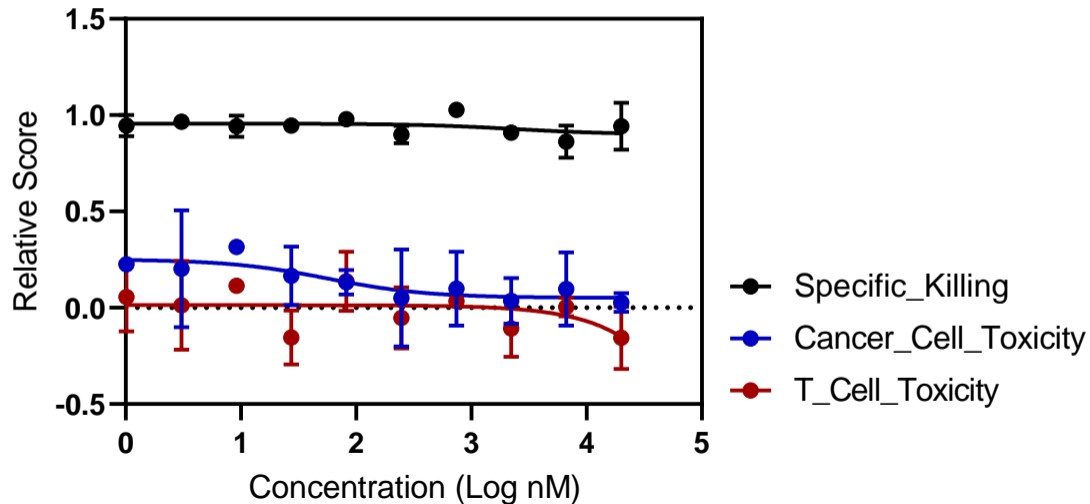



# DMF

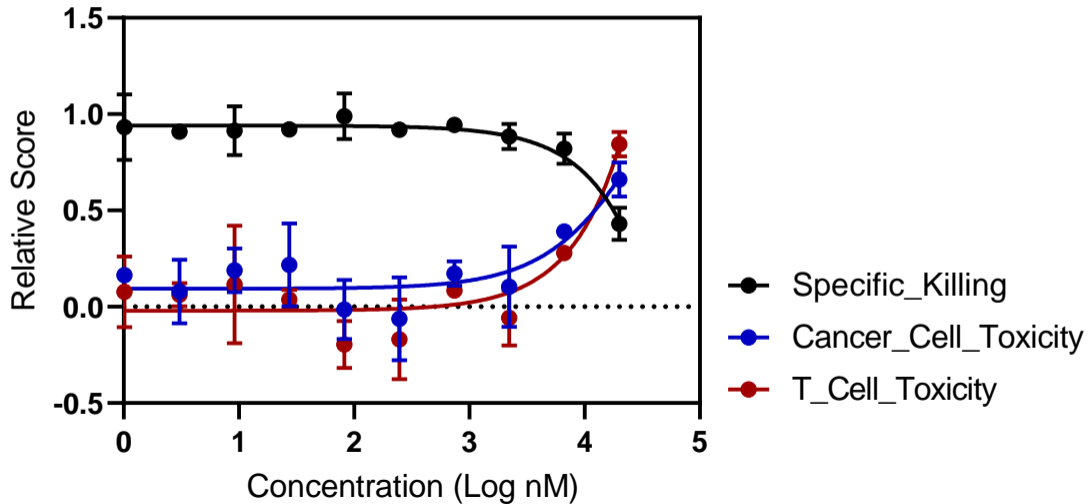

# Dorsomorphin dihydrochloride

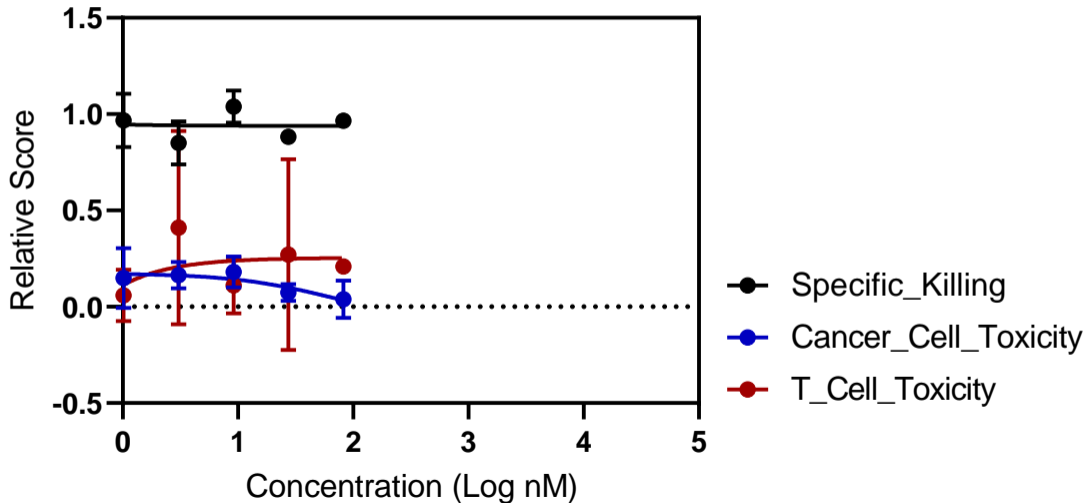

# Dorzolamide

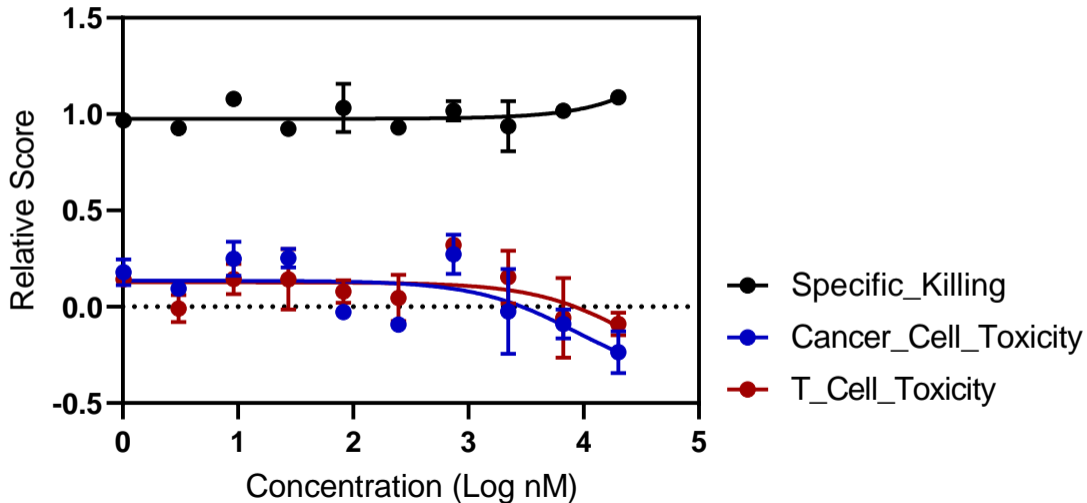

# Ebselen

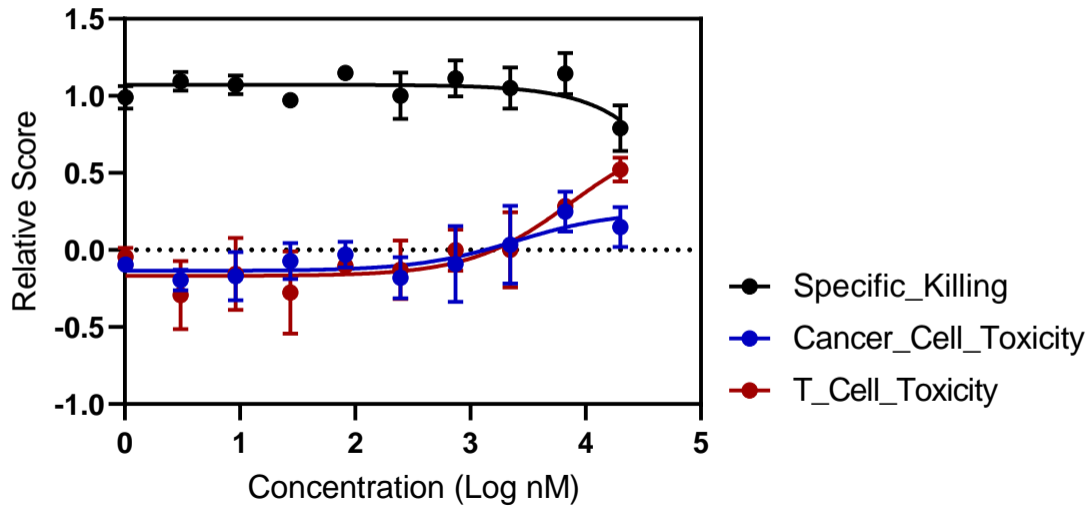

# Eeyarestatin I

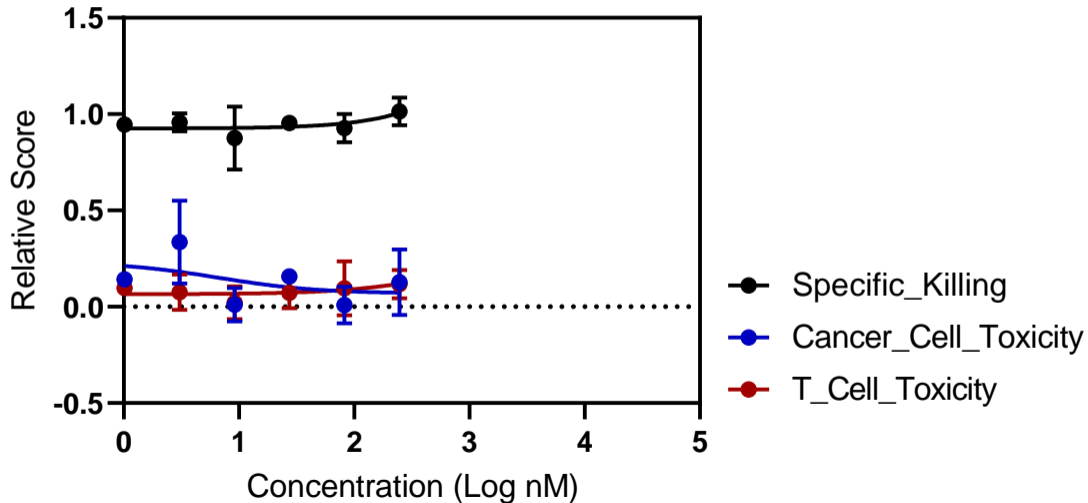

# Elesclomol

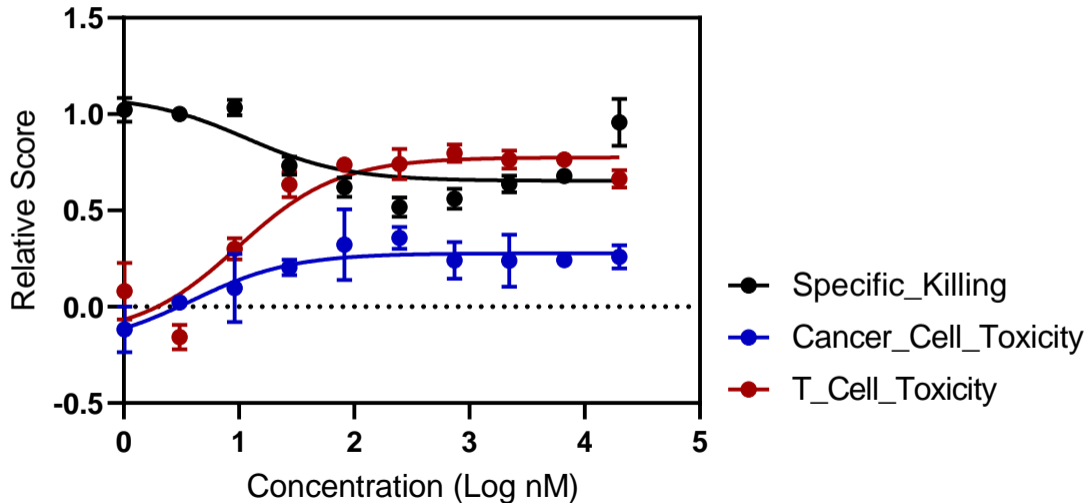

# Empagliflozin

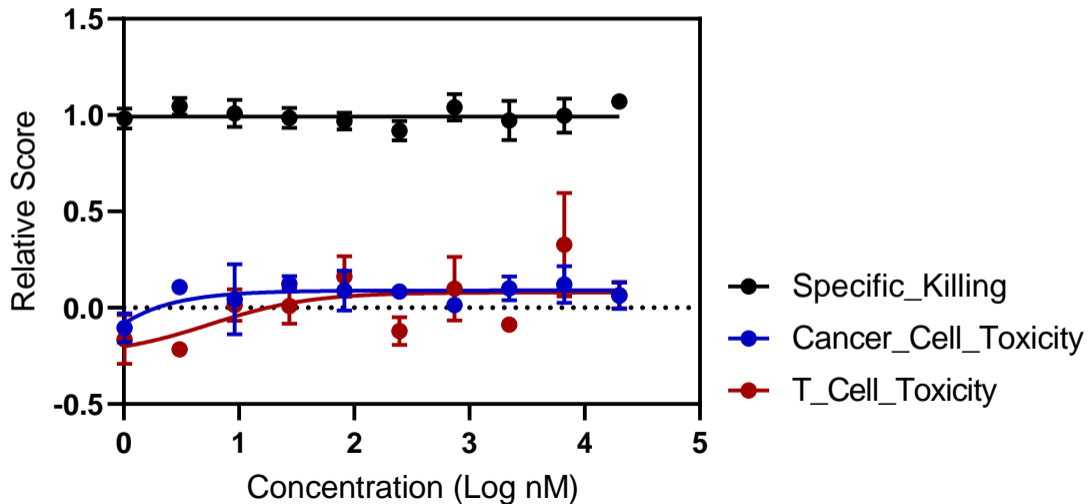

# Erastin

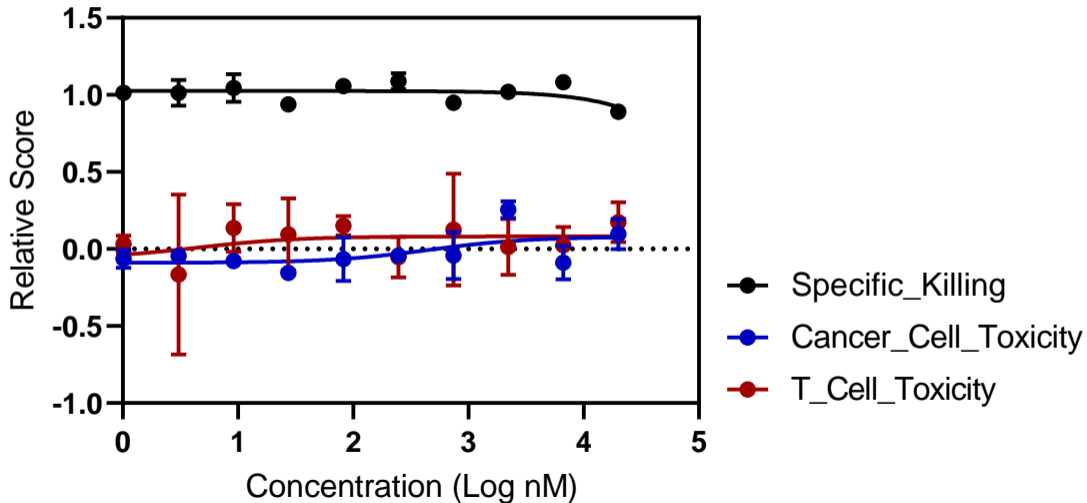



# Ethidium Bromide

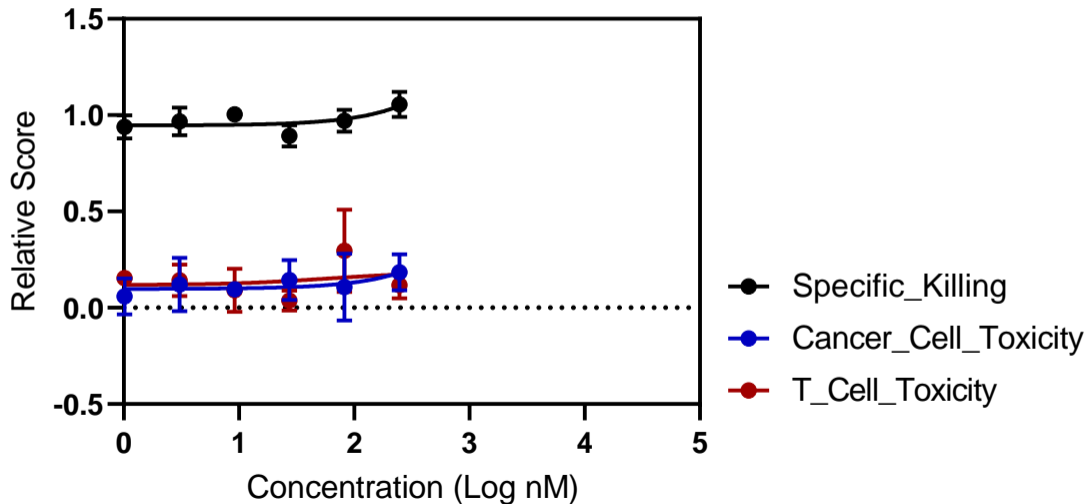

# Ezatiostat

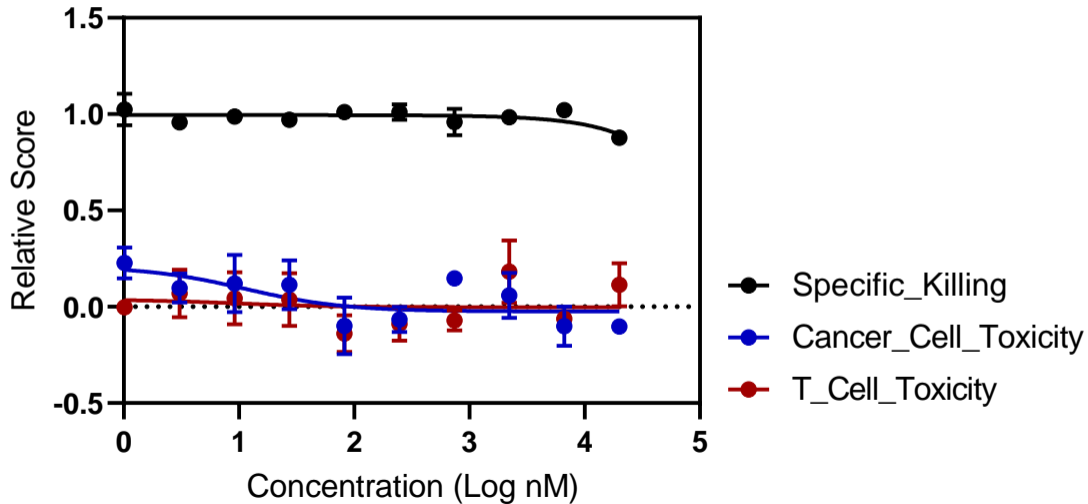

# Fatostatin A

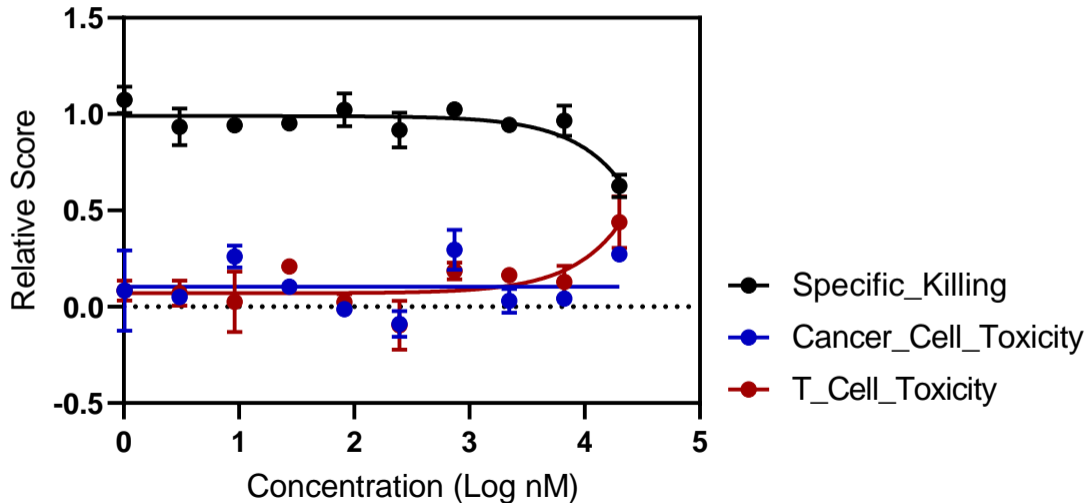

# FCCP

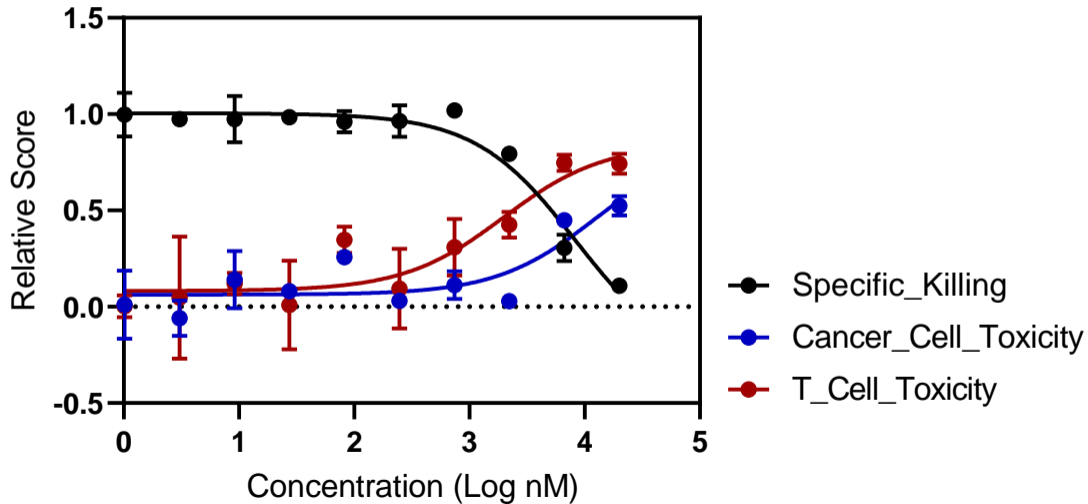

# Febuxostat

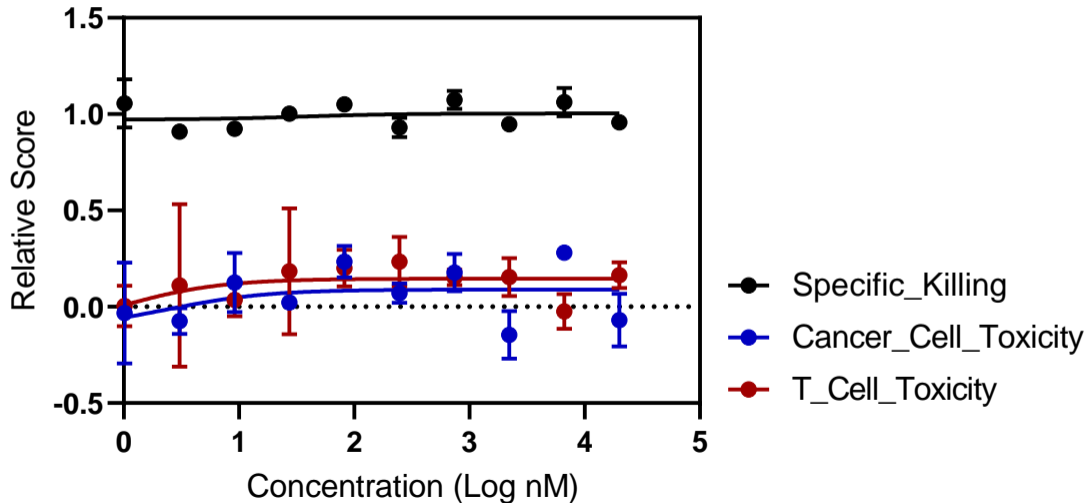

# Fedratinib (SAR302503, TG101348)

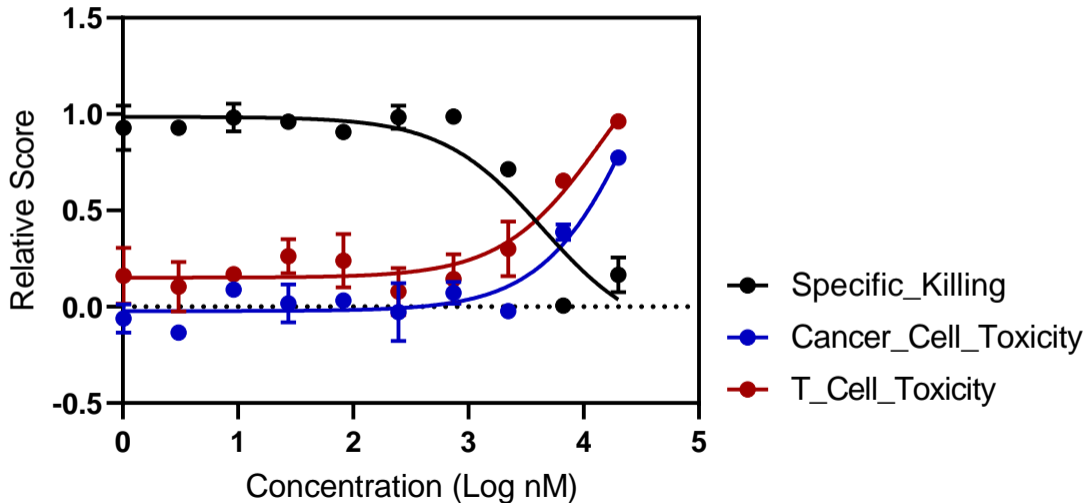

# Fenretinide

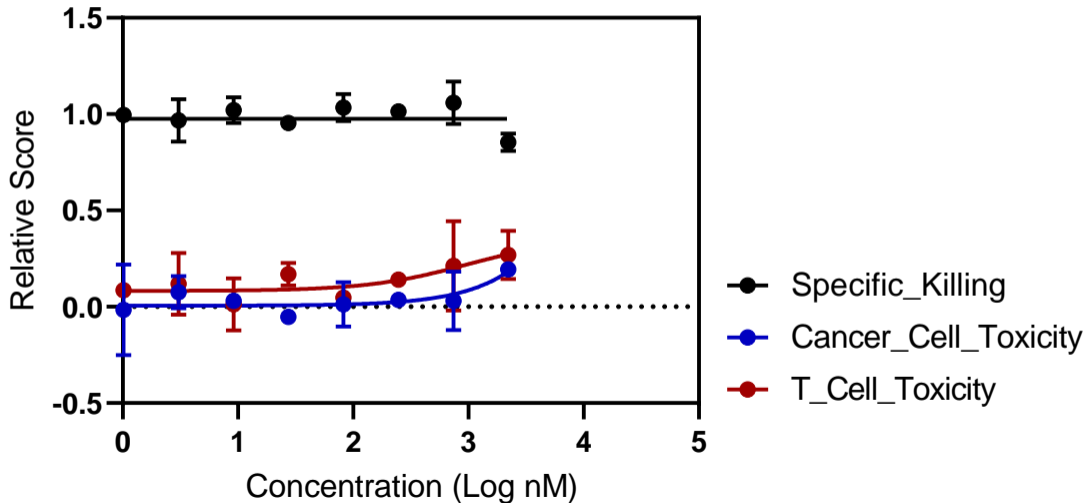

# Finasteride

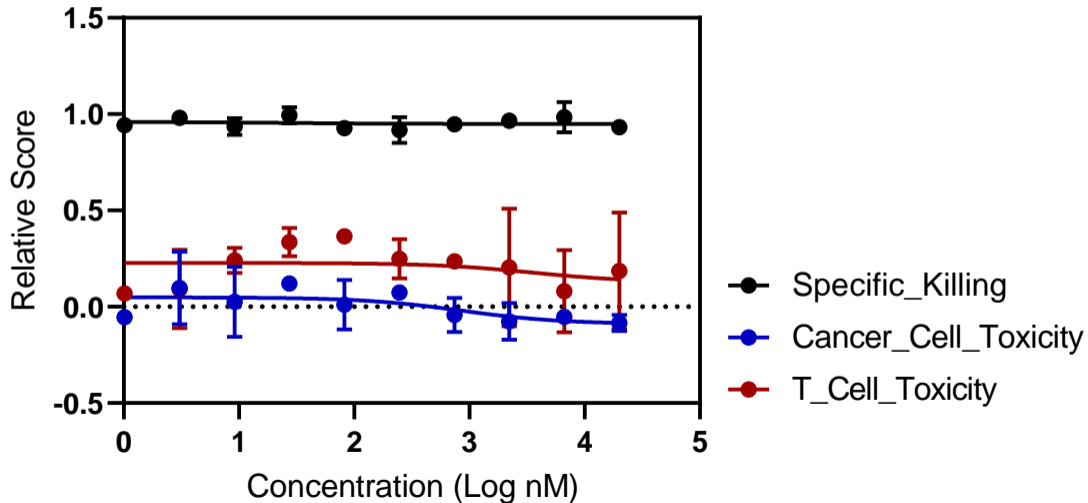



# Fingolimod (FTY720) HCl

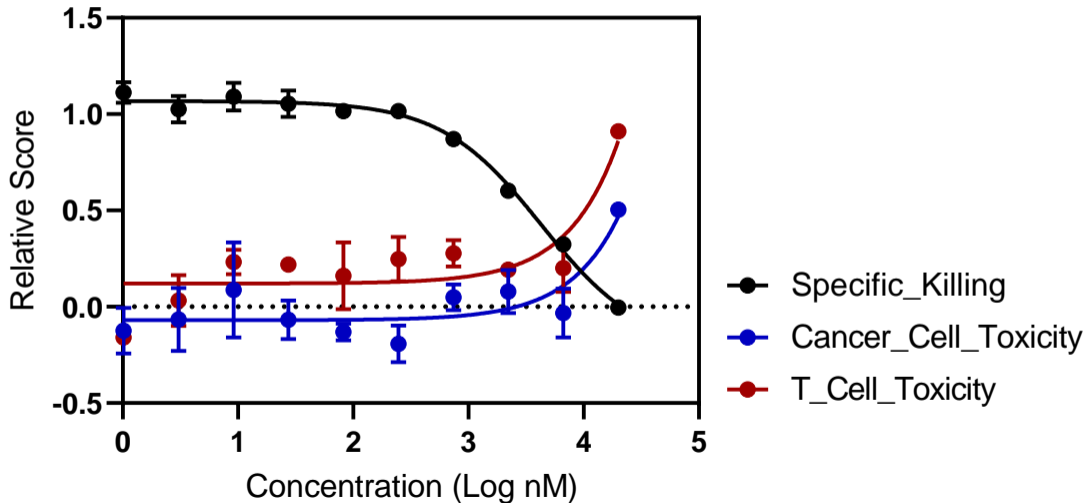

# FK 866 hydrochloride

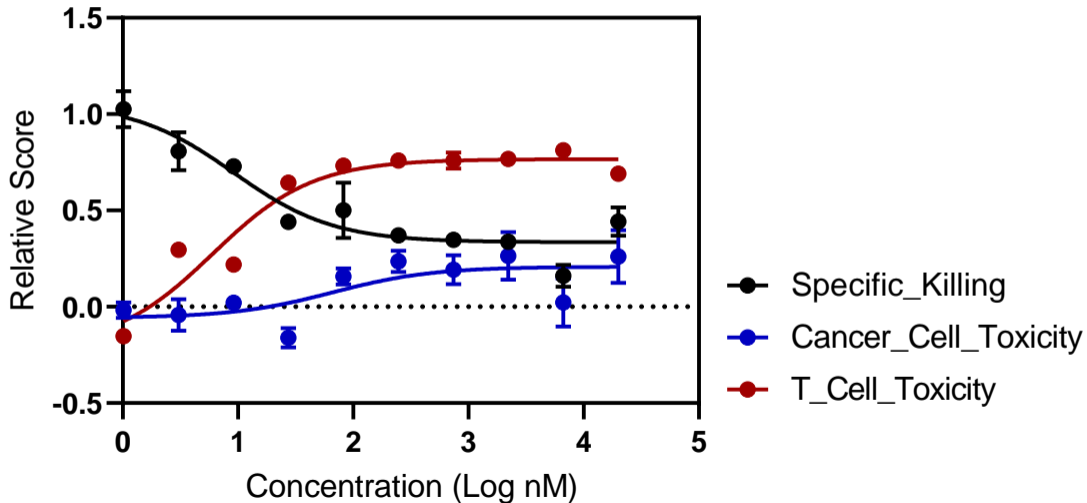

# Fludarabine

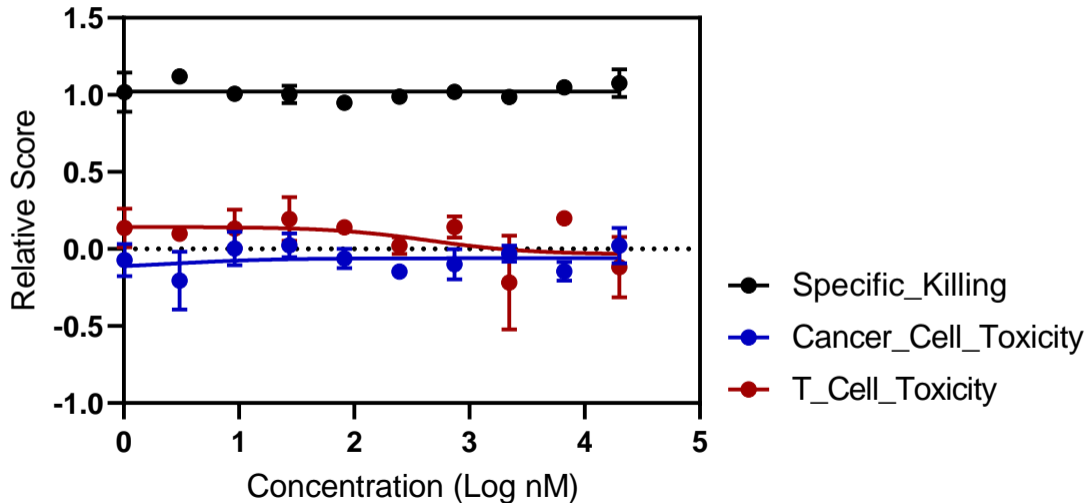

# Fluoxetine hydrochloride

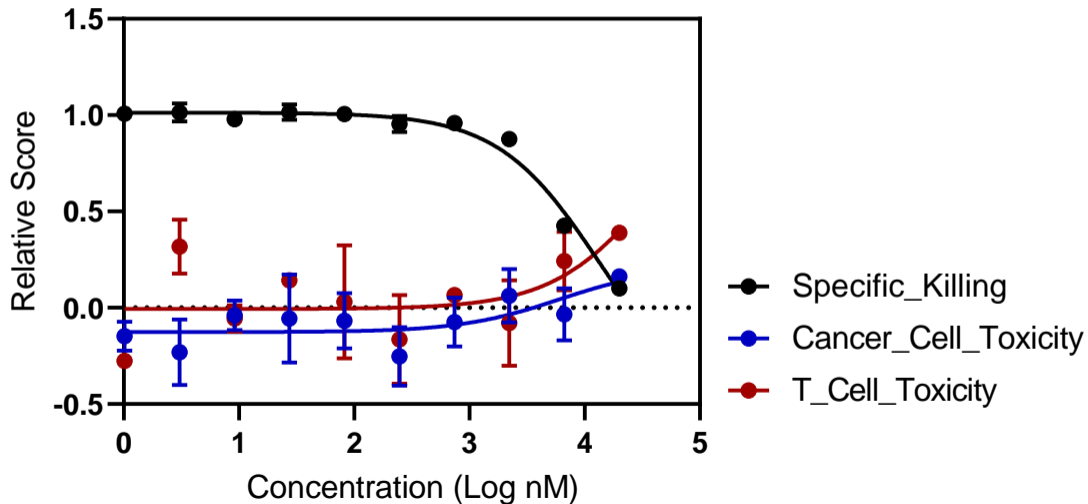

# Fomepizole

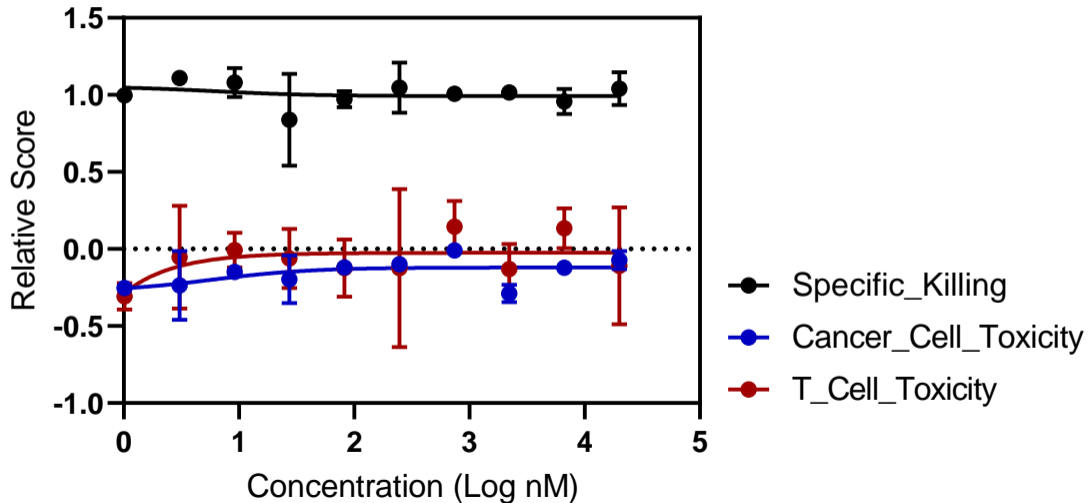

# Furosemide

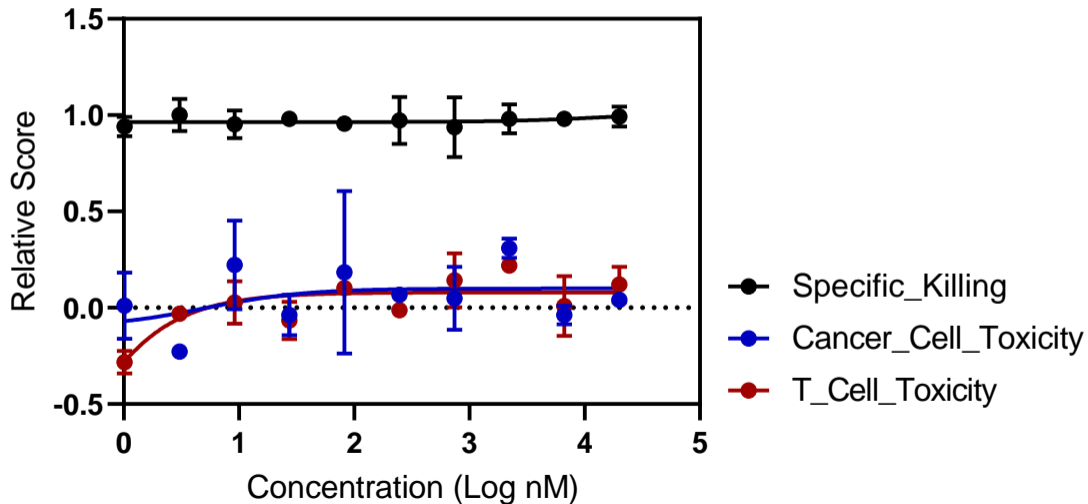

# Gemcitabine hydrochloride

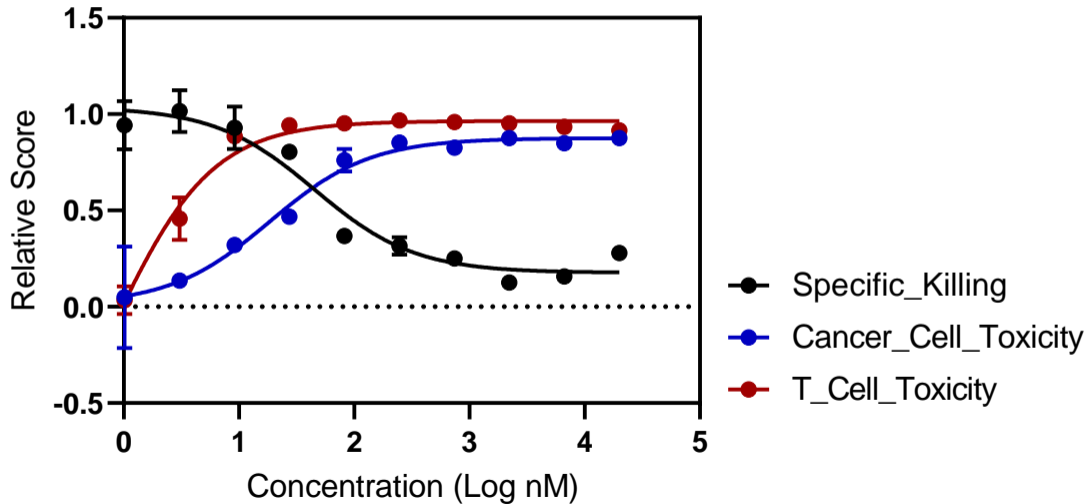

# GGsTop

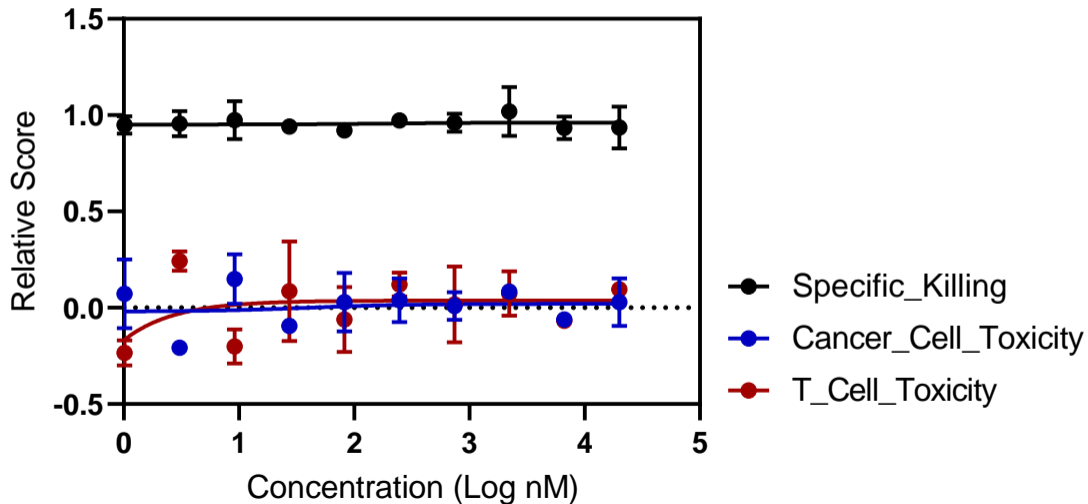



# Gossypol

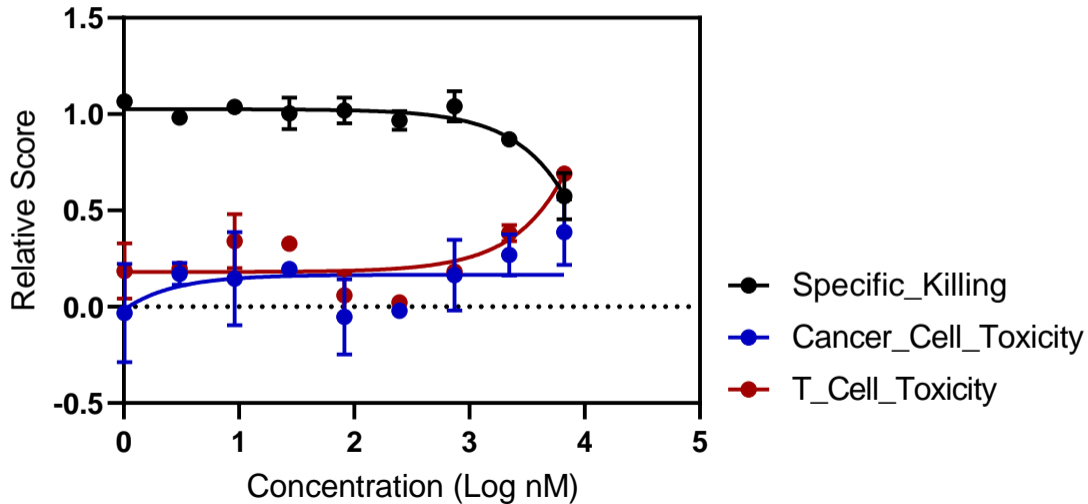

## GPP 78 hydrochloride

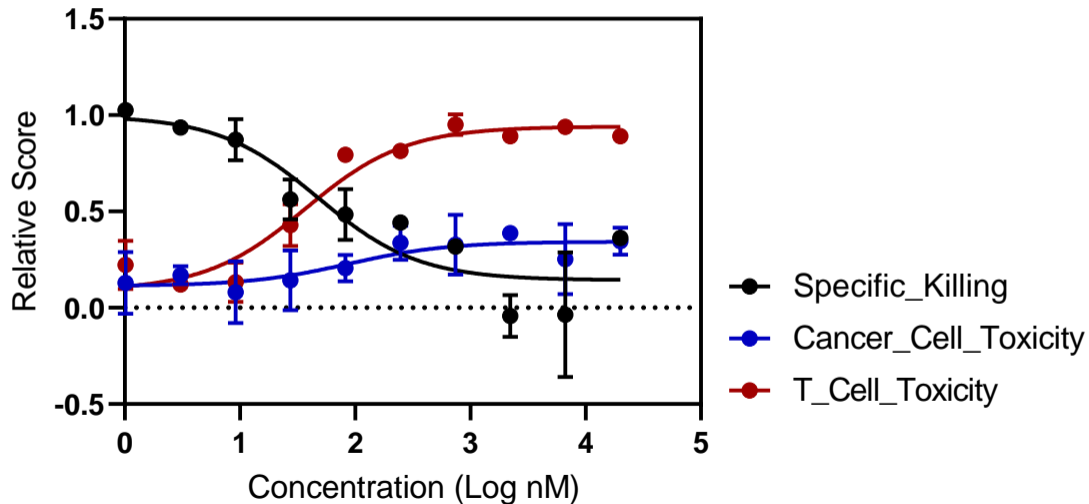

# GSK 2194069

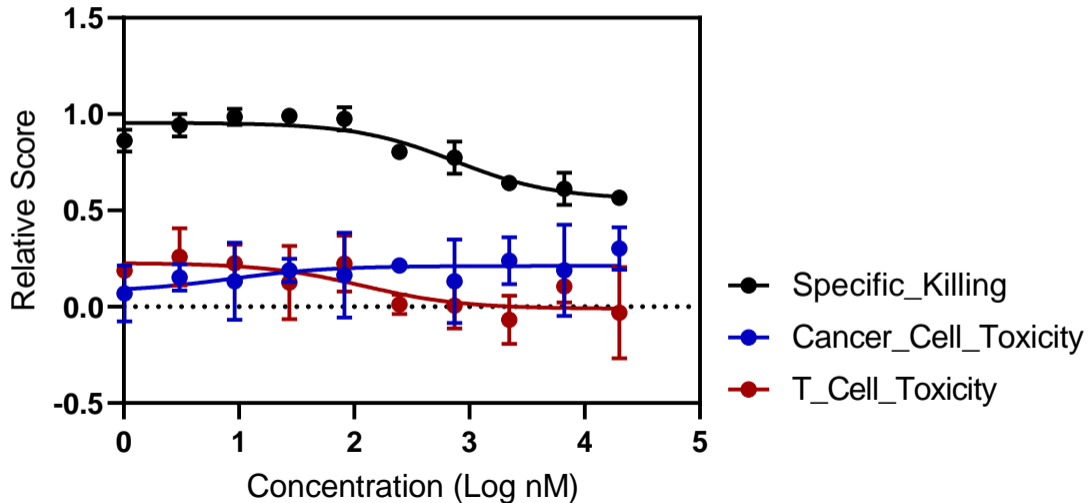

# GSK2656157

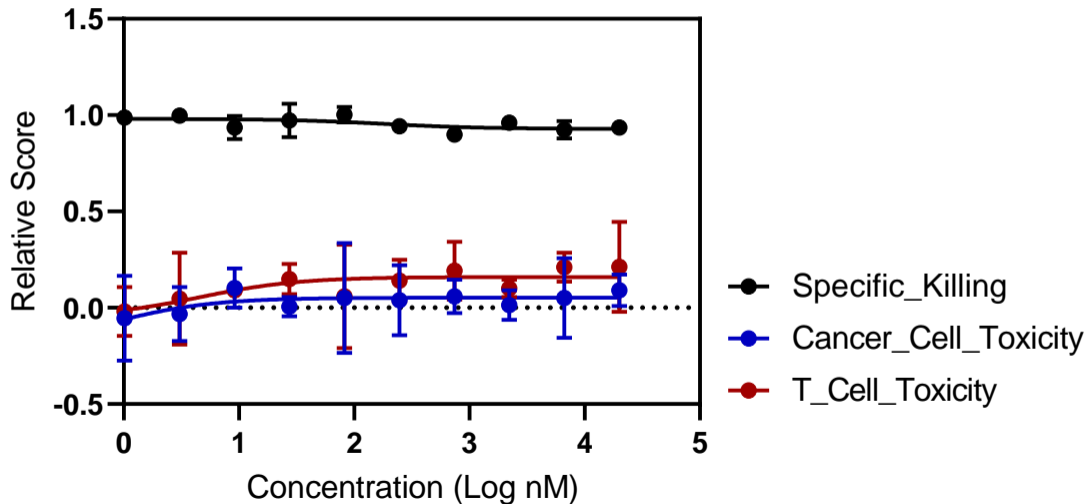

# Hispidulin

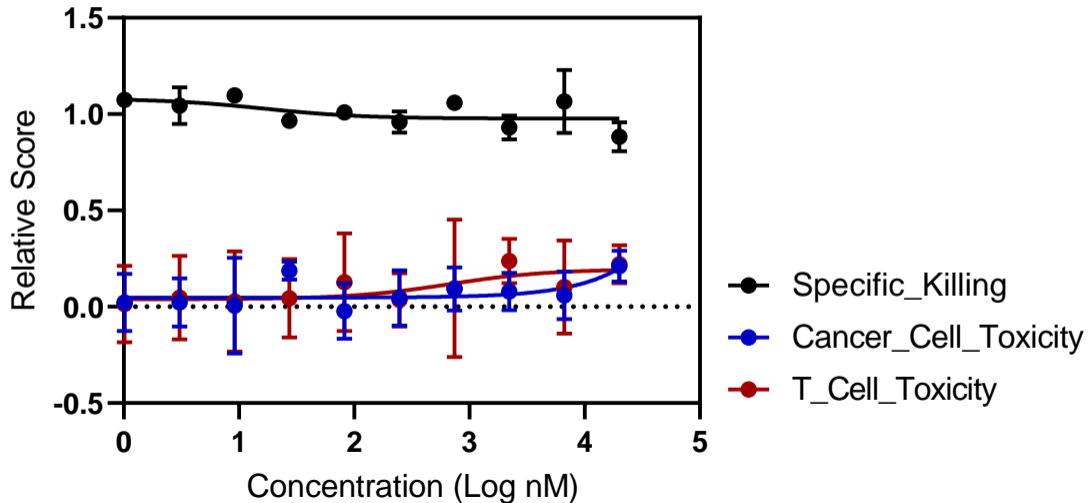

# Hydroxyurea

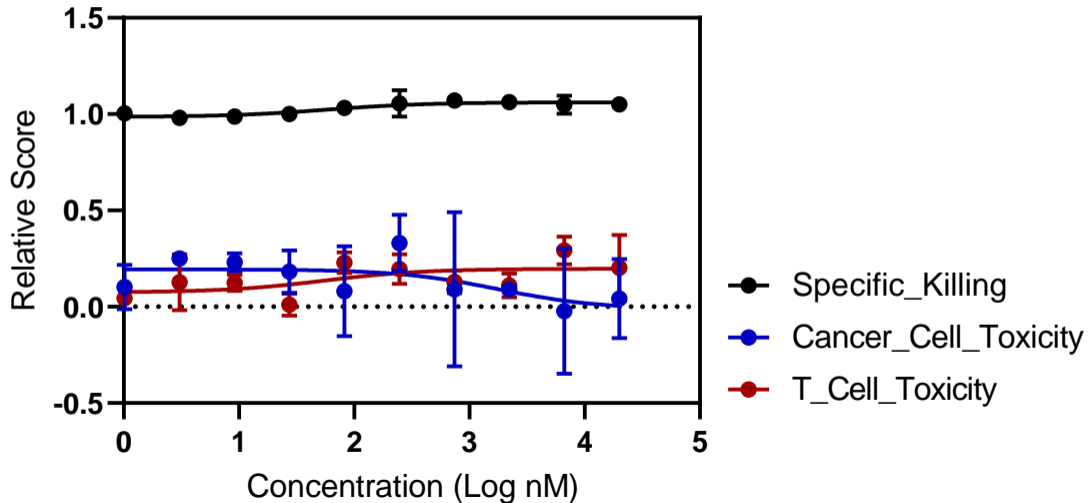

# Ipragliflozin

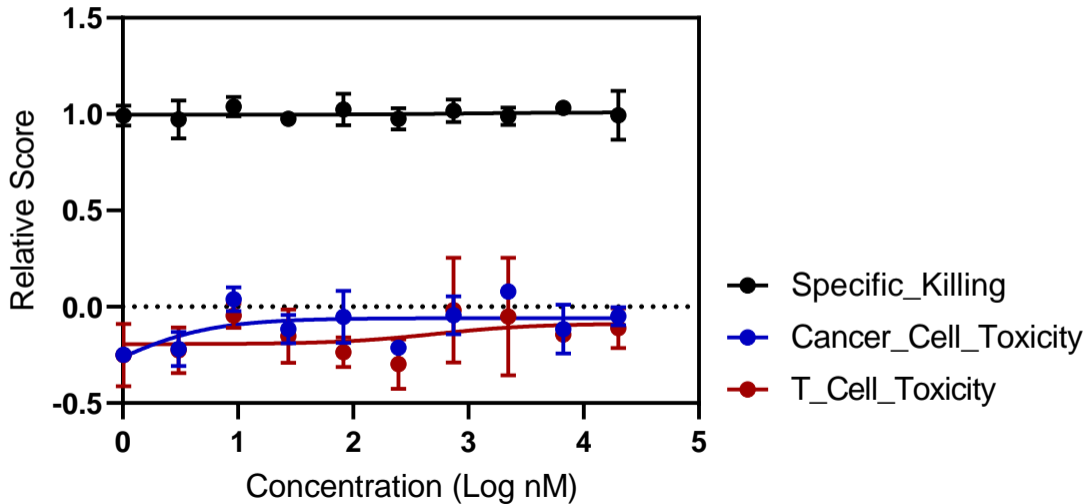

# Isotretinoin

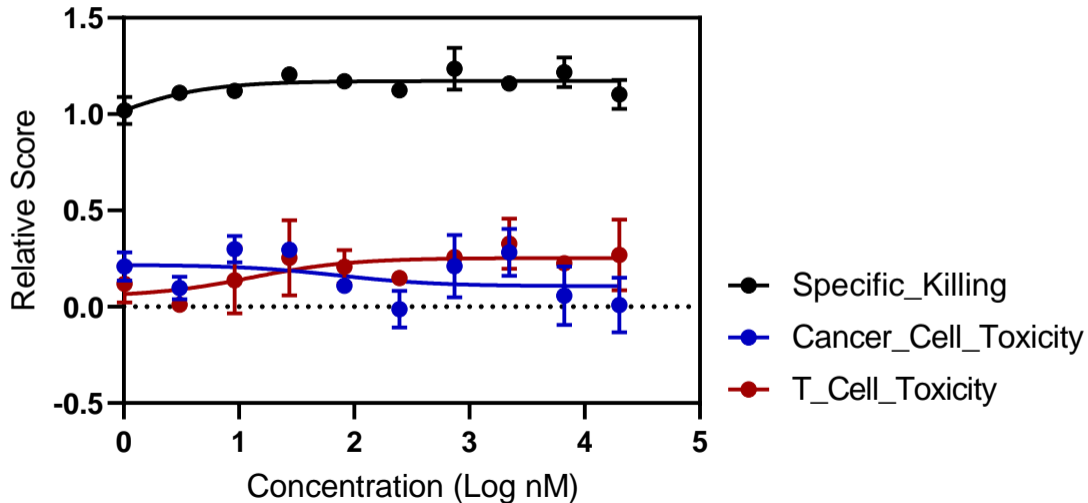



# Jasmonic Acid methyl ester

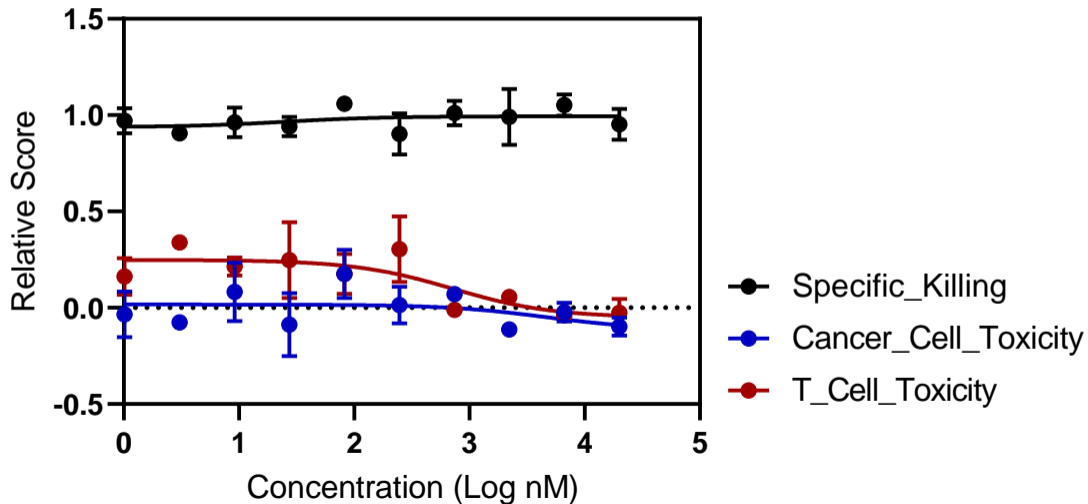

# JZL184

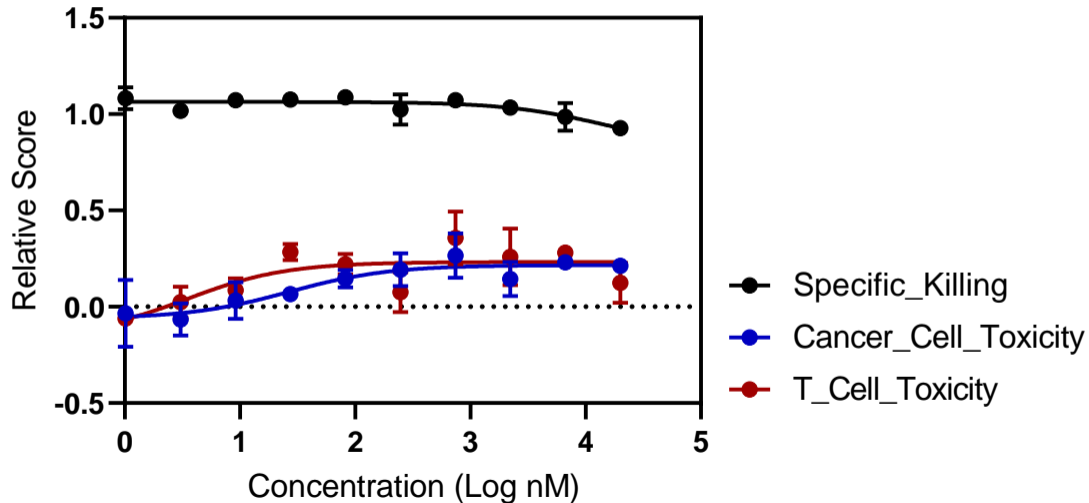

# Ketoconazole

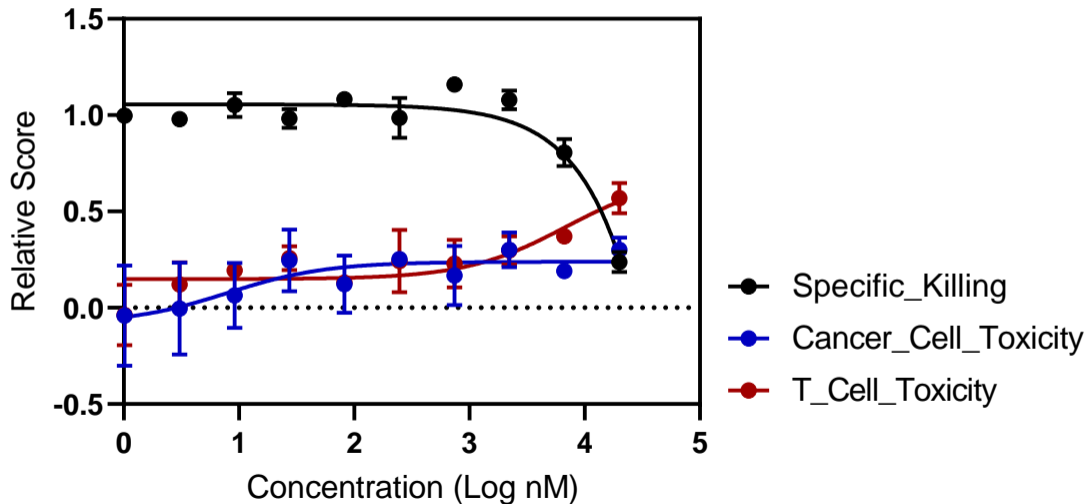

# Kifunensine

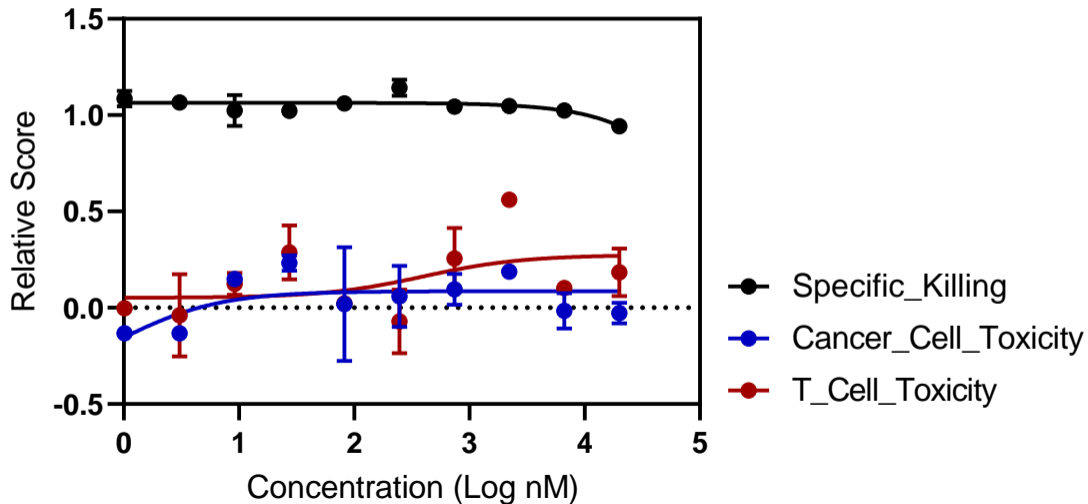

# Lapachol

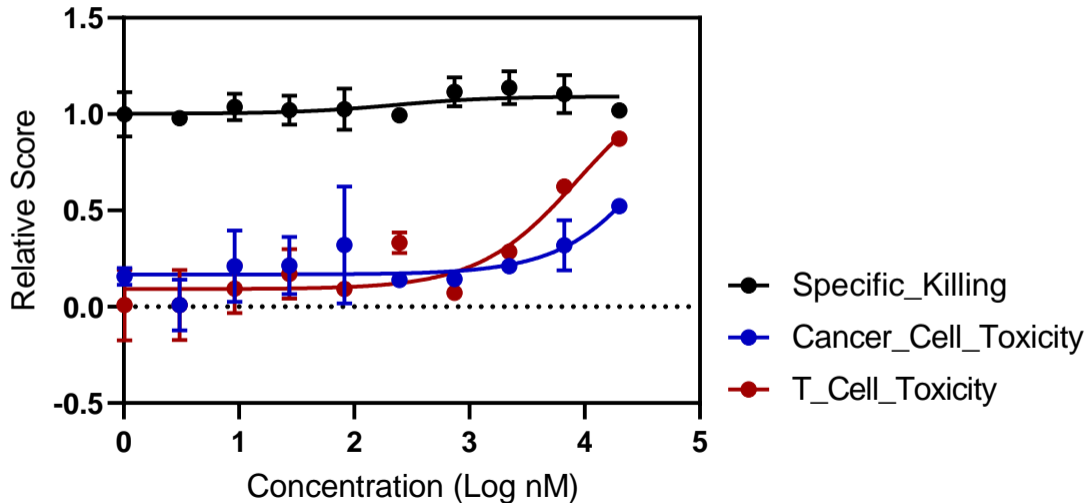

# L-Canaline

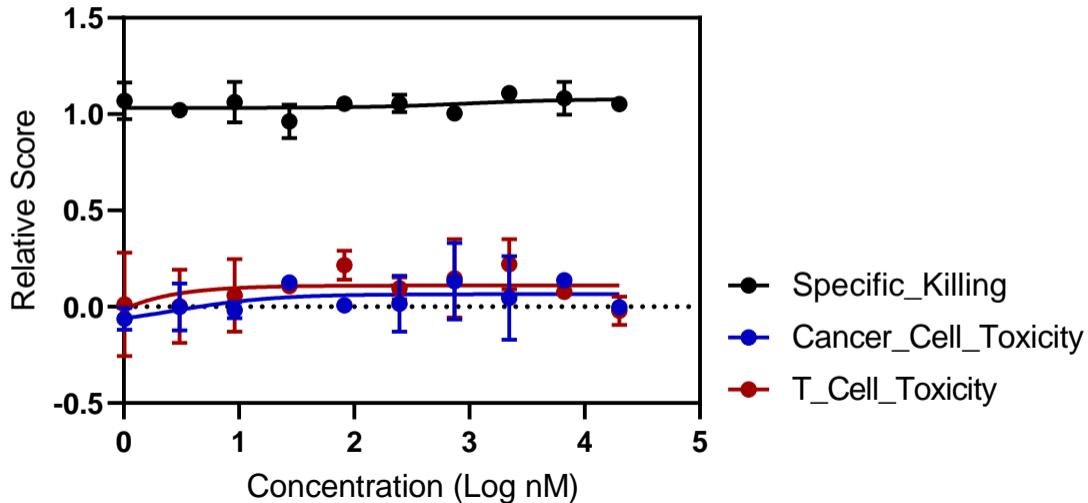

# LCS-1

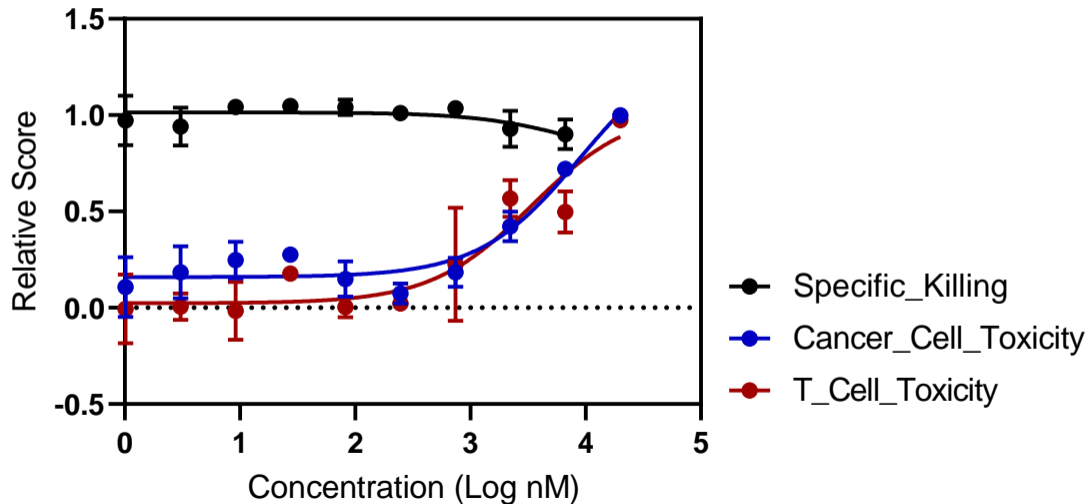

# Leflunomide

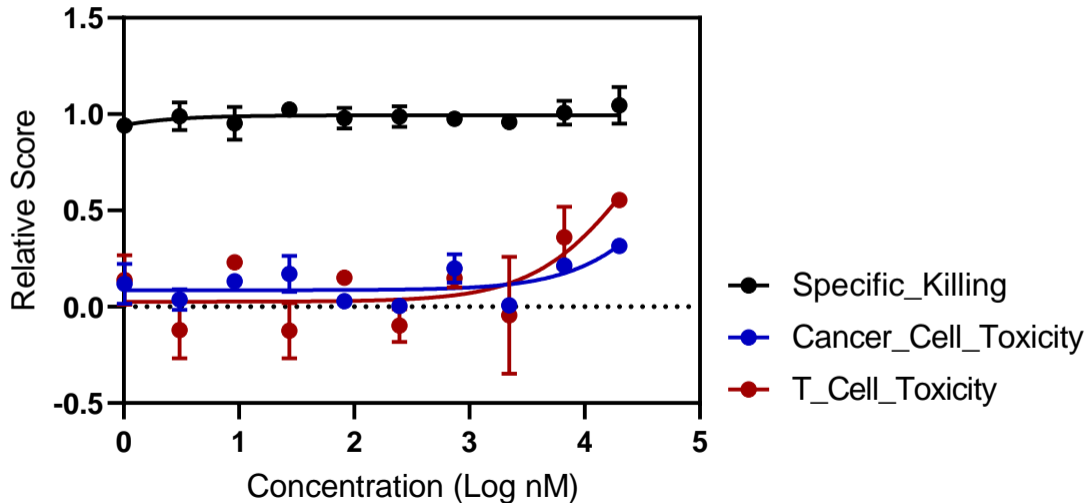



# Lesinurad

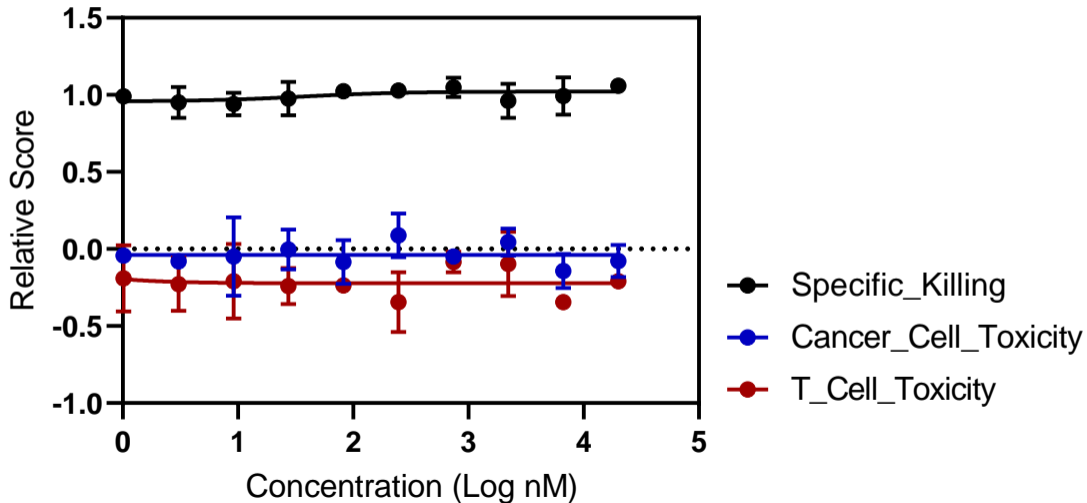

# Linezolid

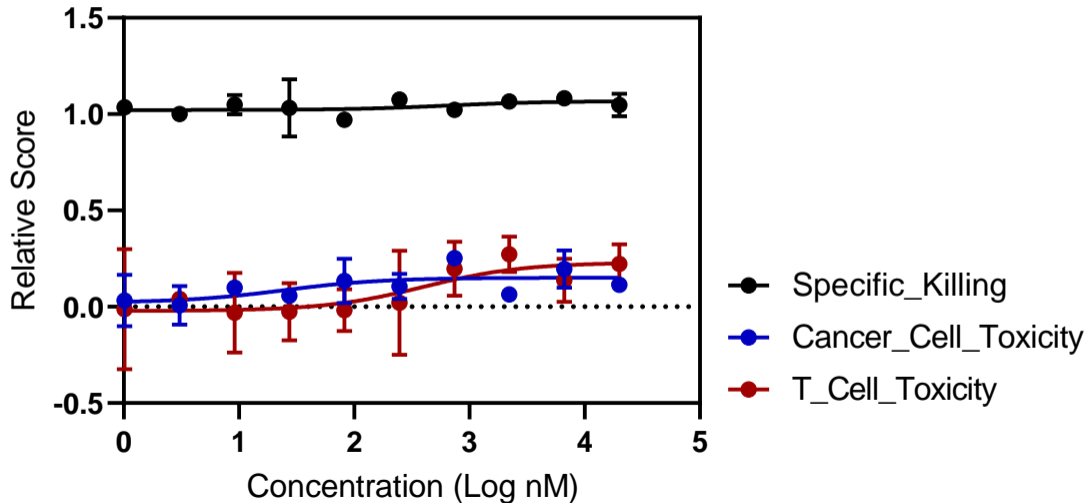

# Lometrexol hydrate

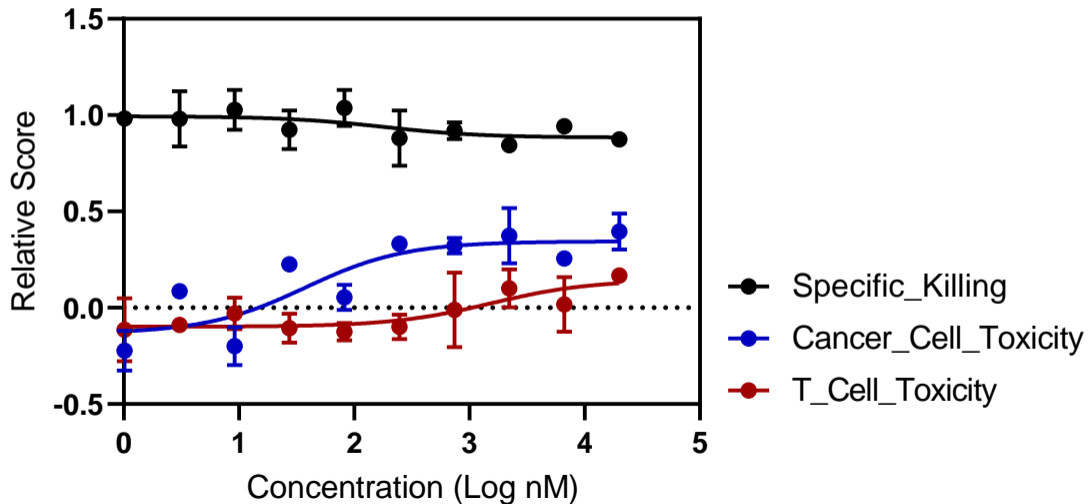

# Lonidamine

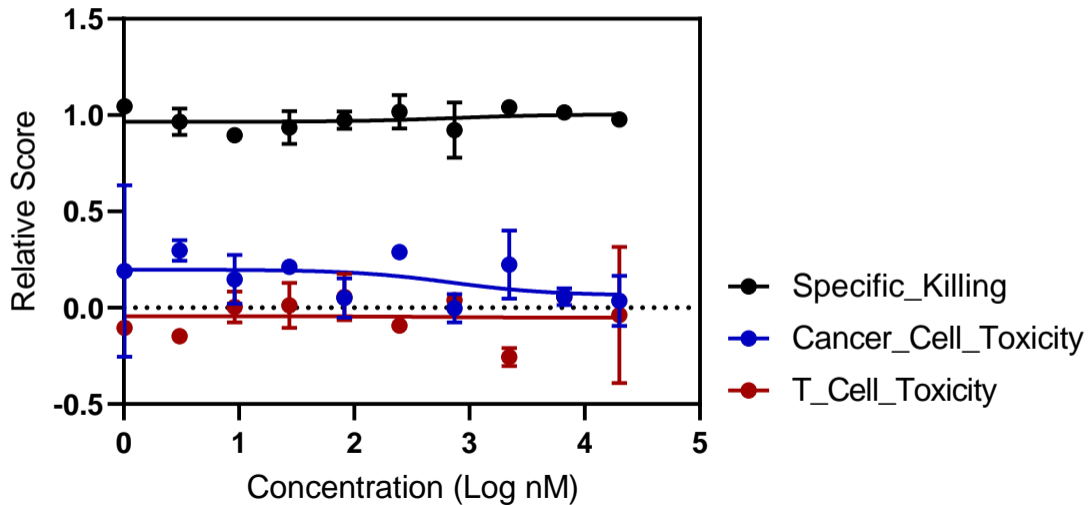

# Meclizine 2HCl

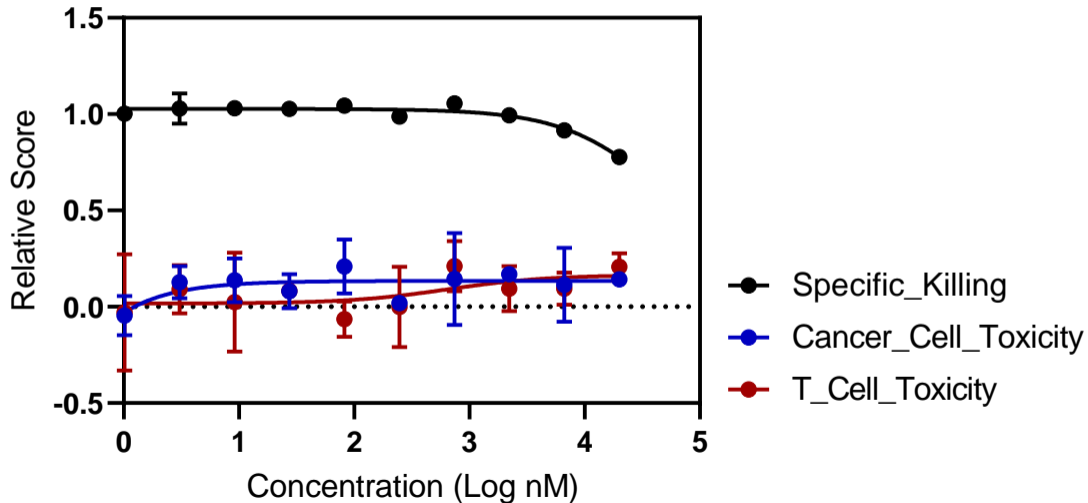

# Mefloquine HCl

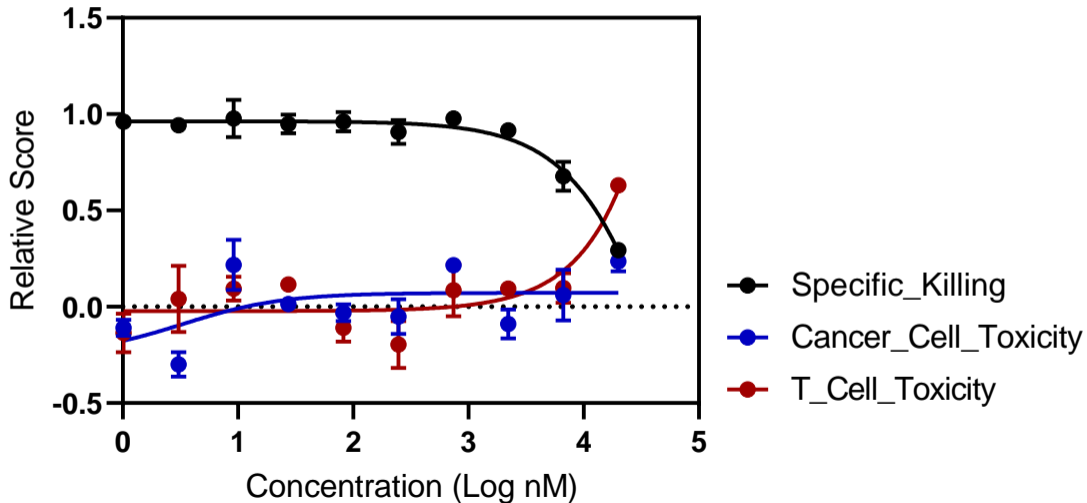

# Menadione

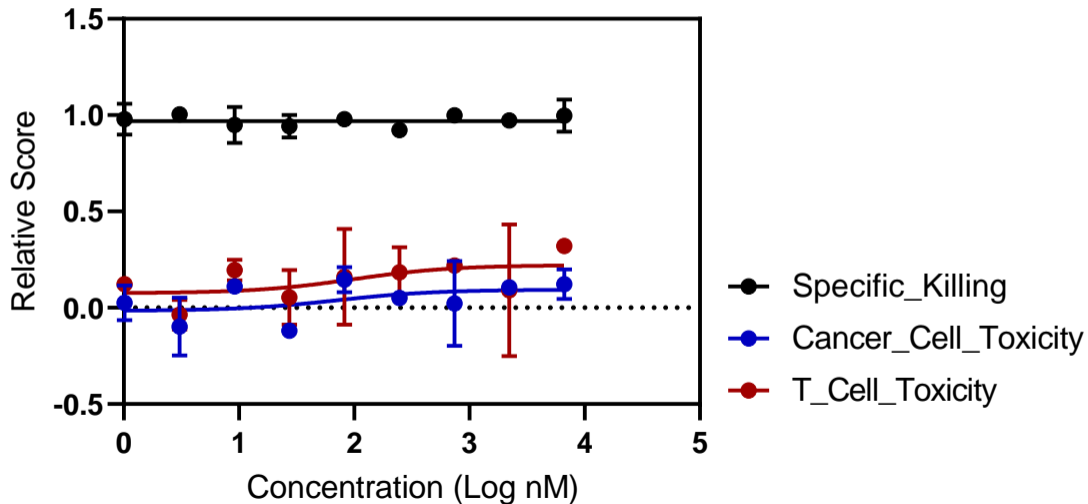

# Mercaptopurine

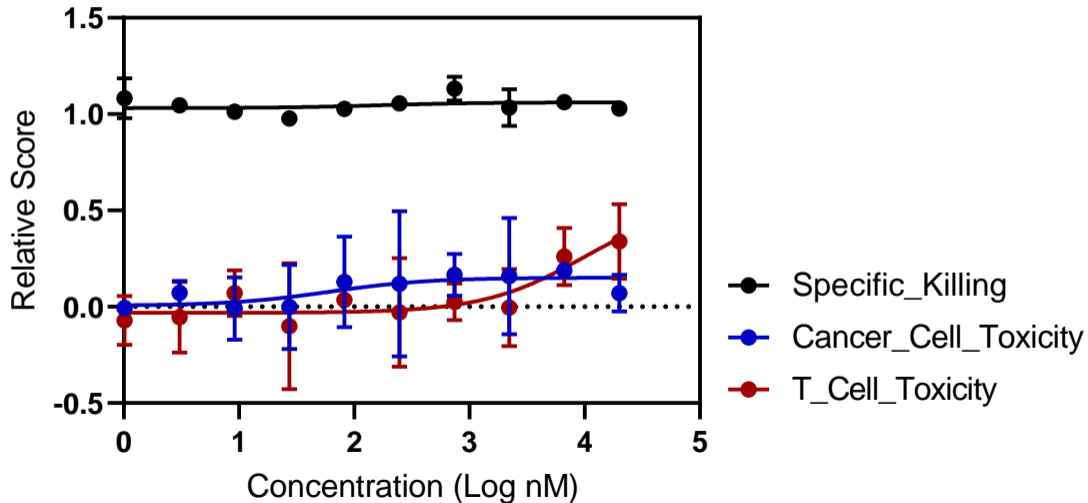



# Metformin hydrochloride

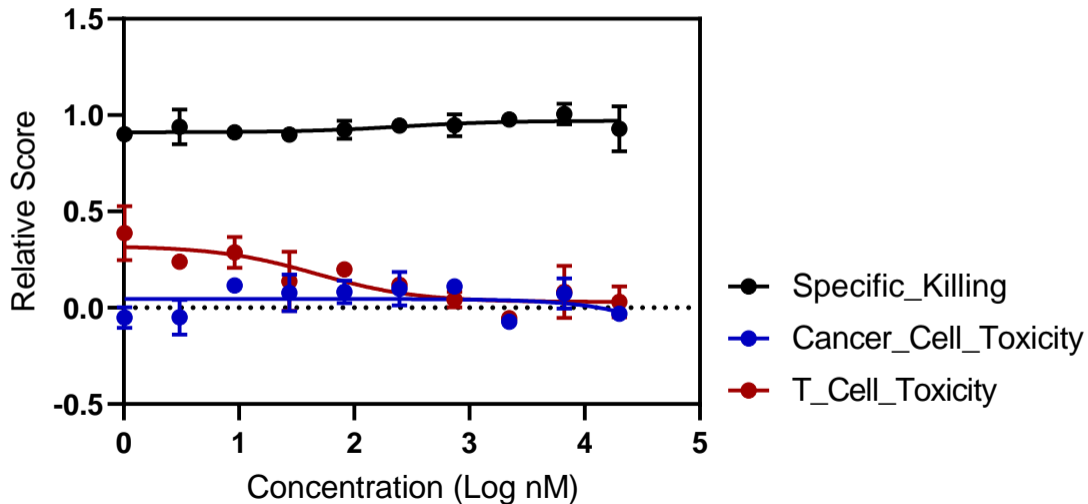

# Methotrexate

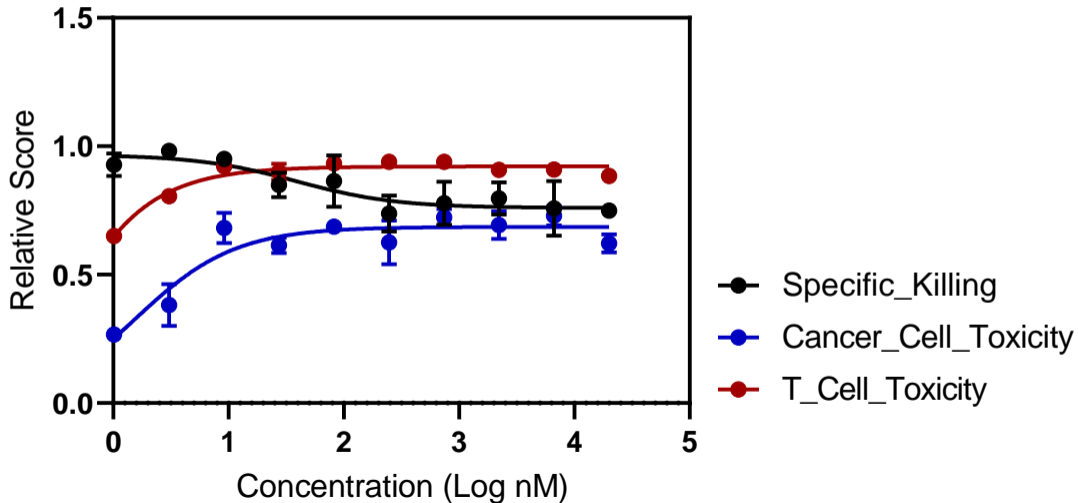

# Methylmalonate

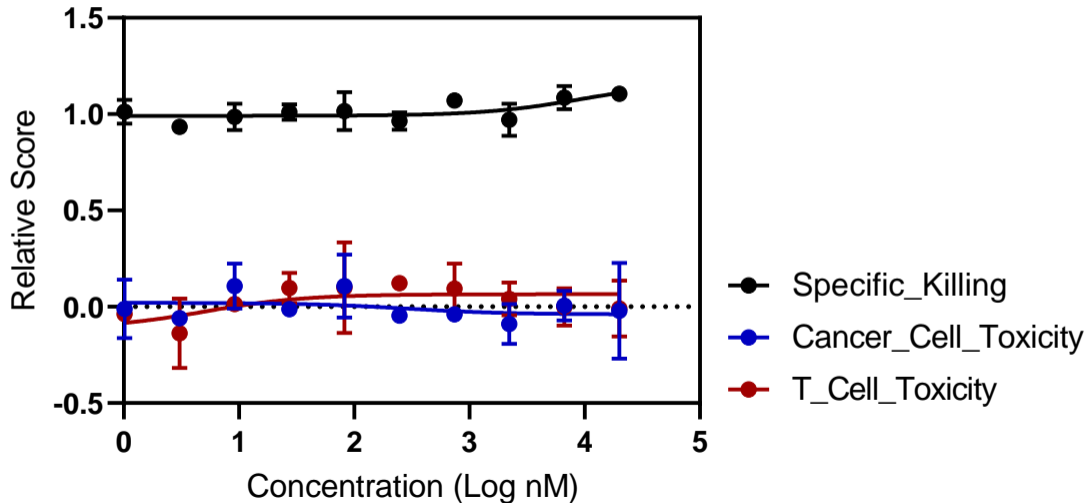

# Metyrapone

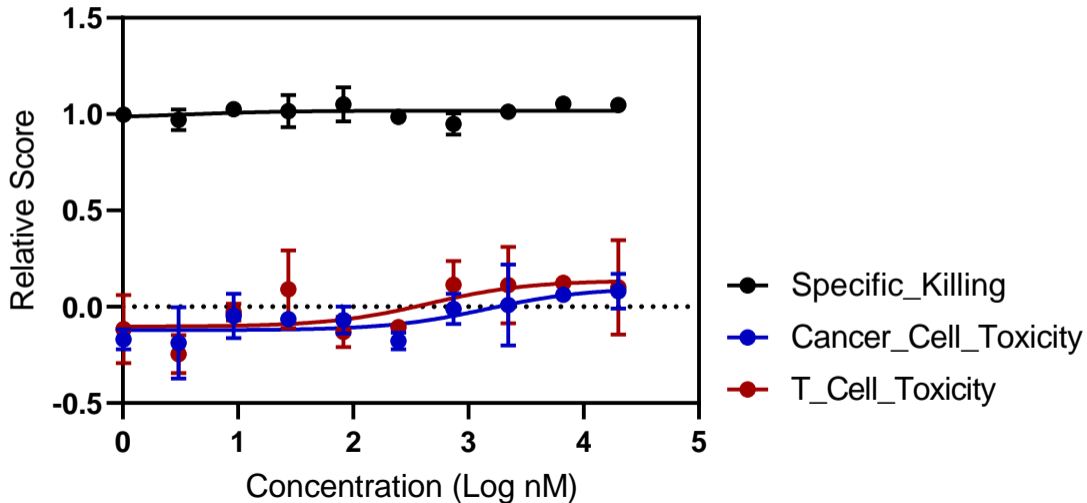

# Miglitol

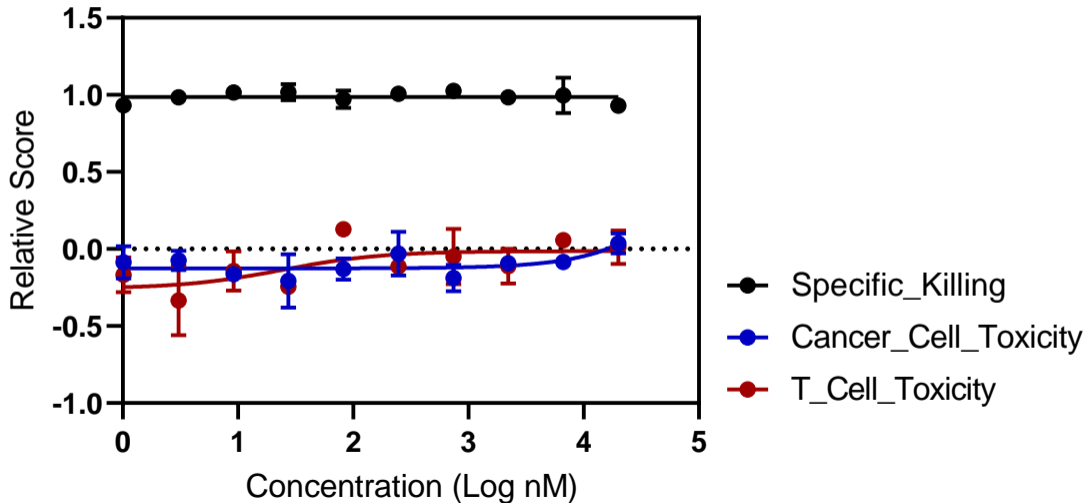

# Miglustat hydrochloride

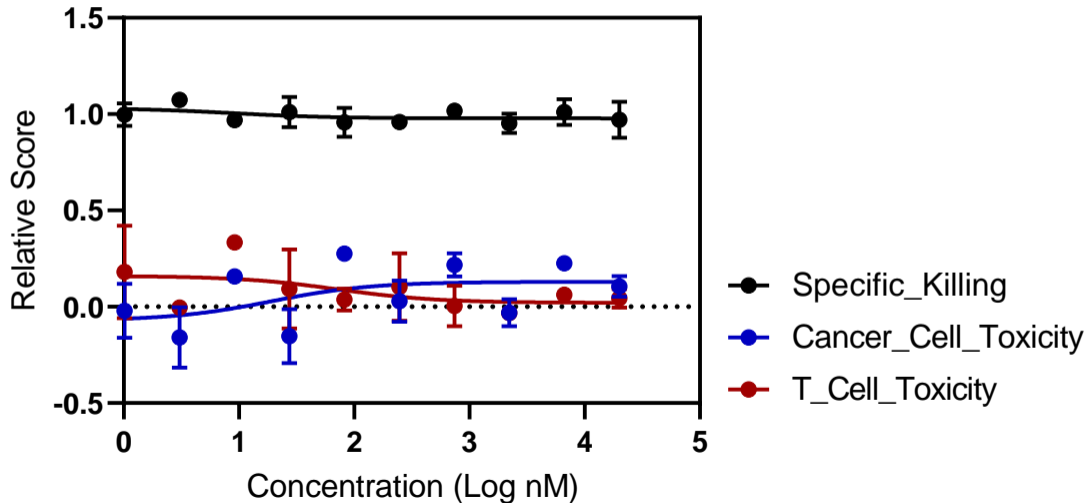

## Mitotane (Lysodren)

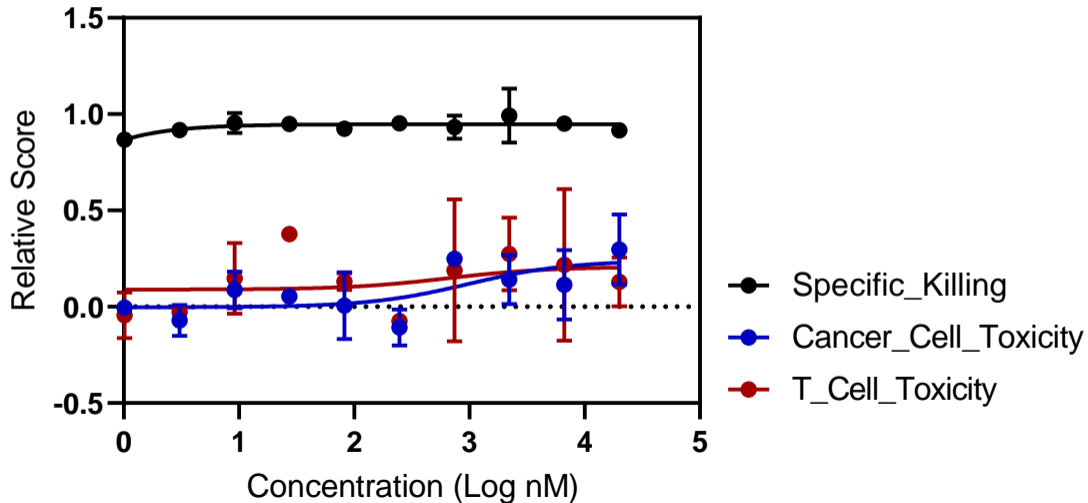

# Mizoribine

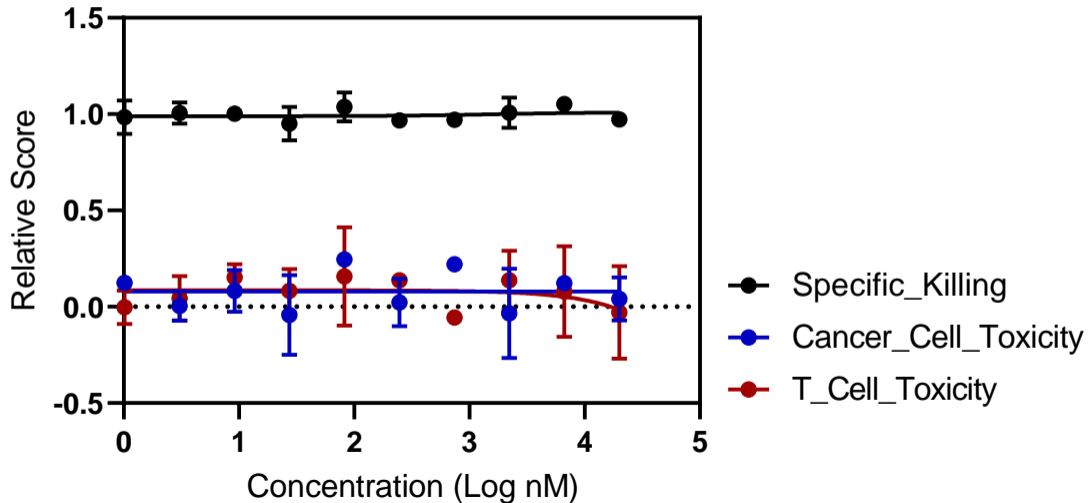



# MKC3946

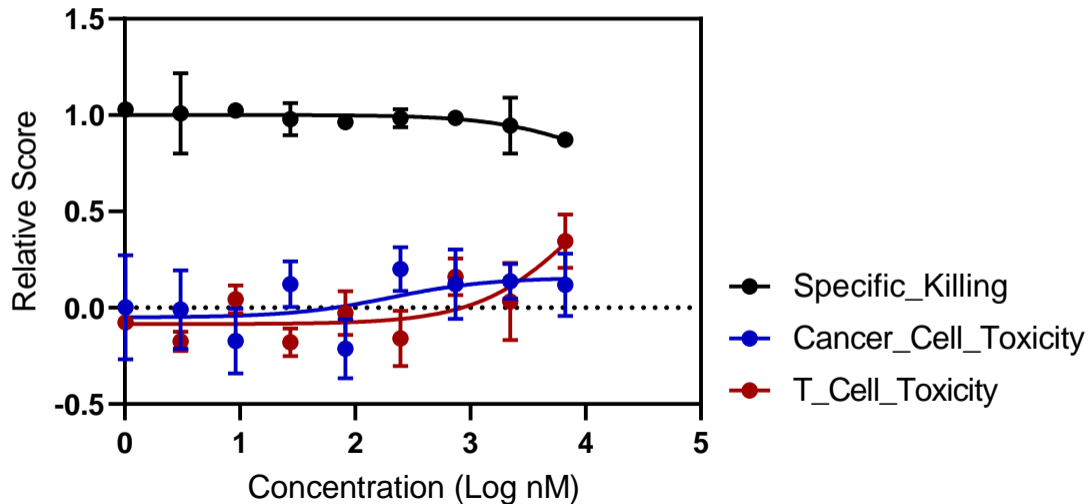

# ML 171

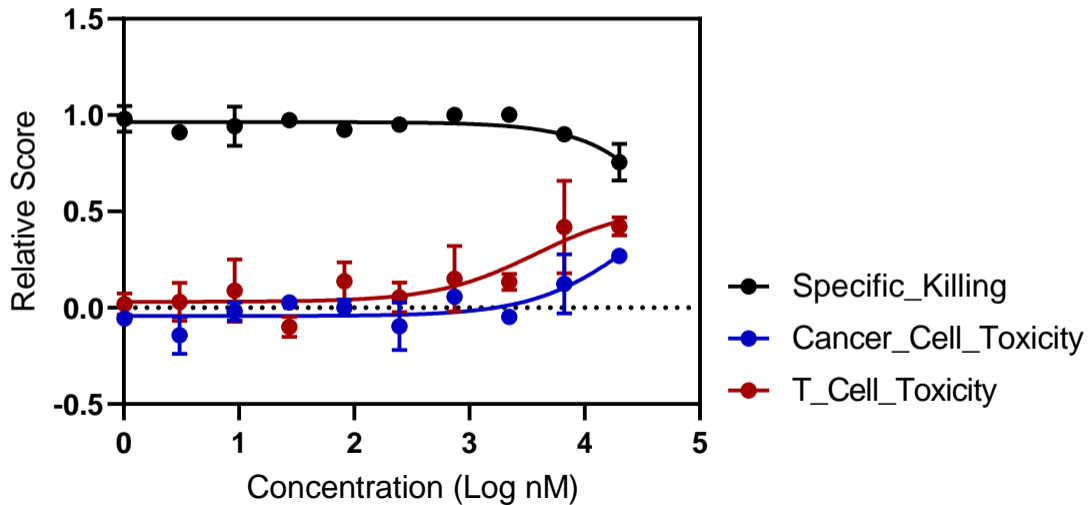

# ML 240

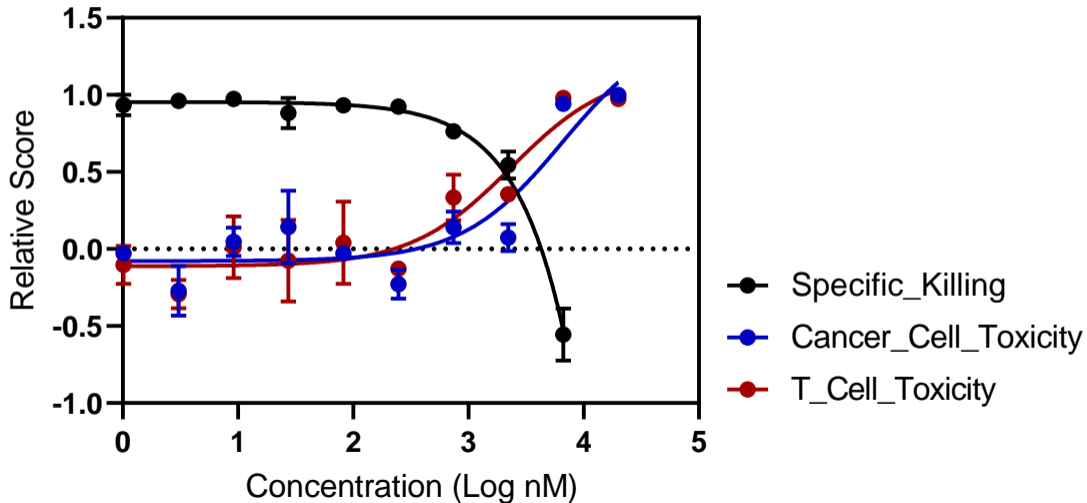

# ML-162

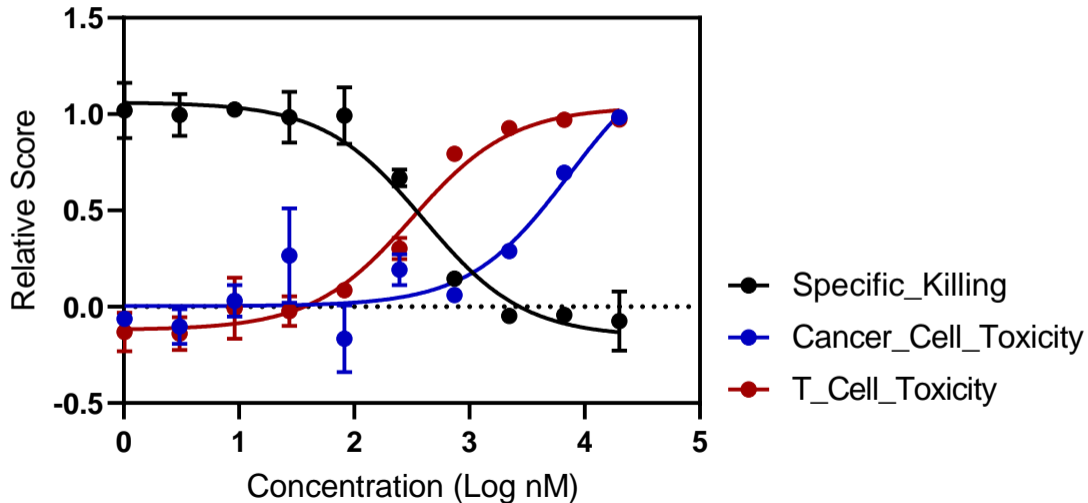

# ML210

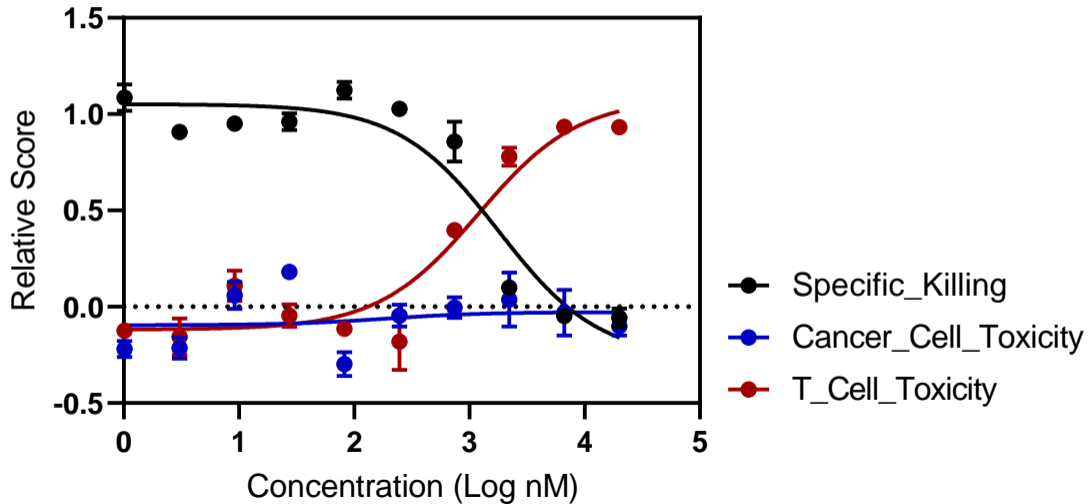

# ML240

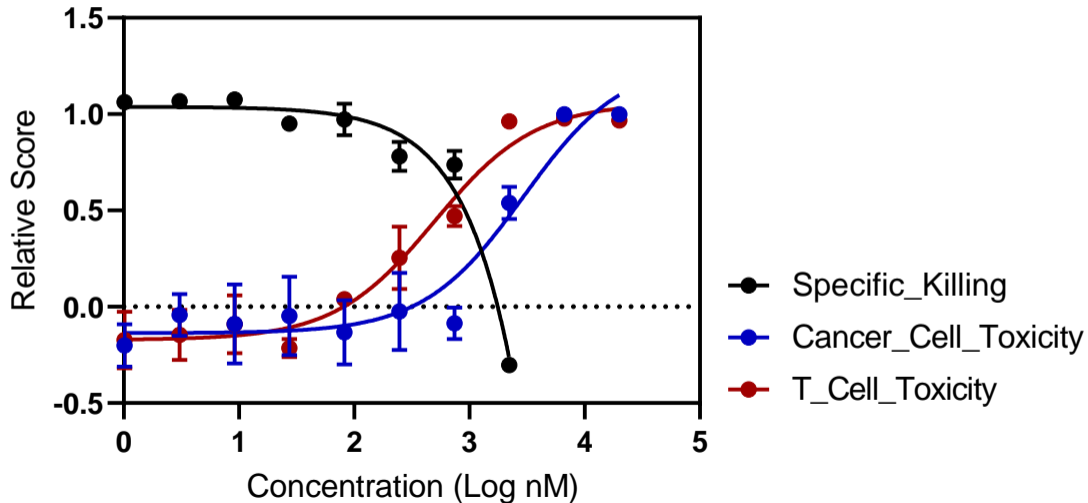

# ML309 HCl

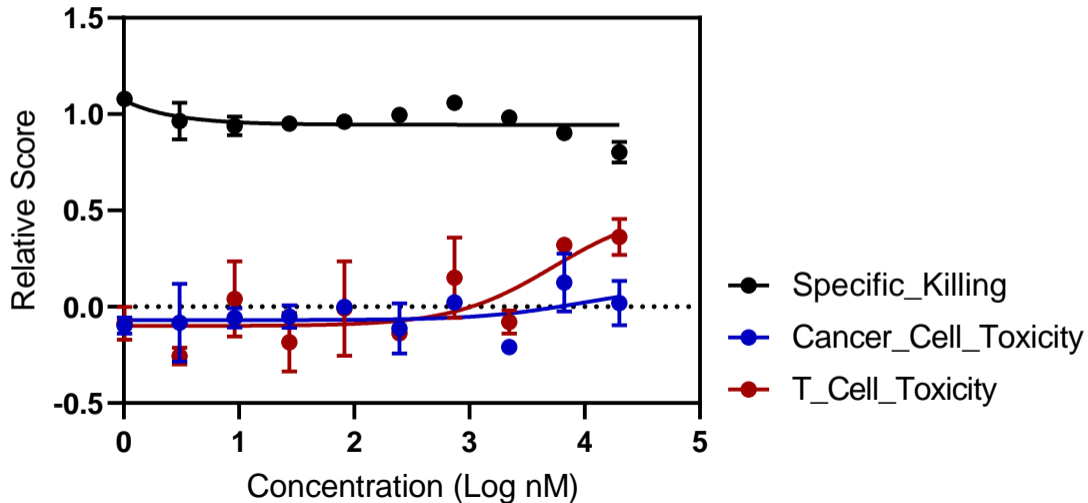

# Mycophenolic Acid

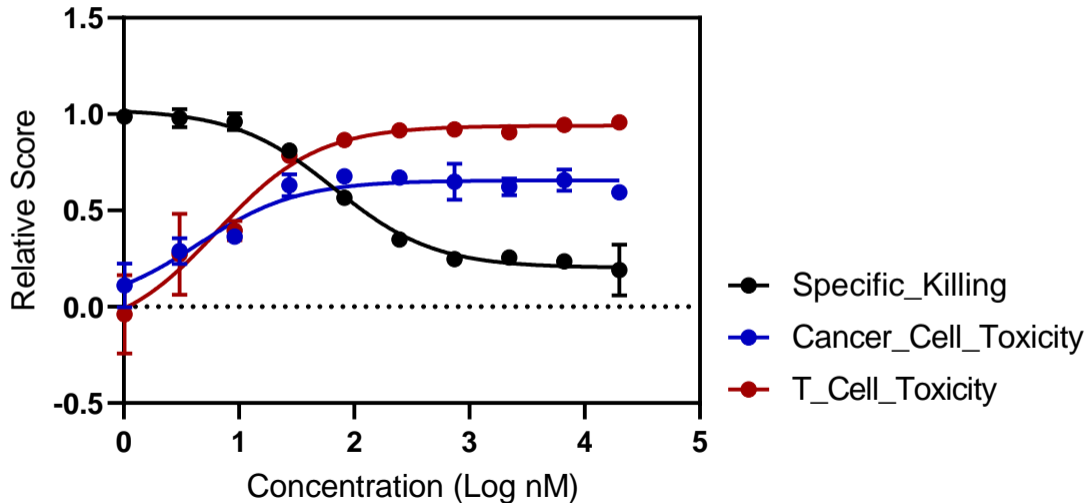



# N,N-Dimethylsphingosine

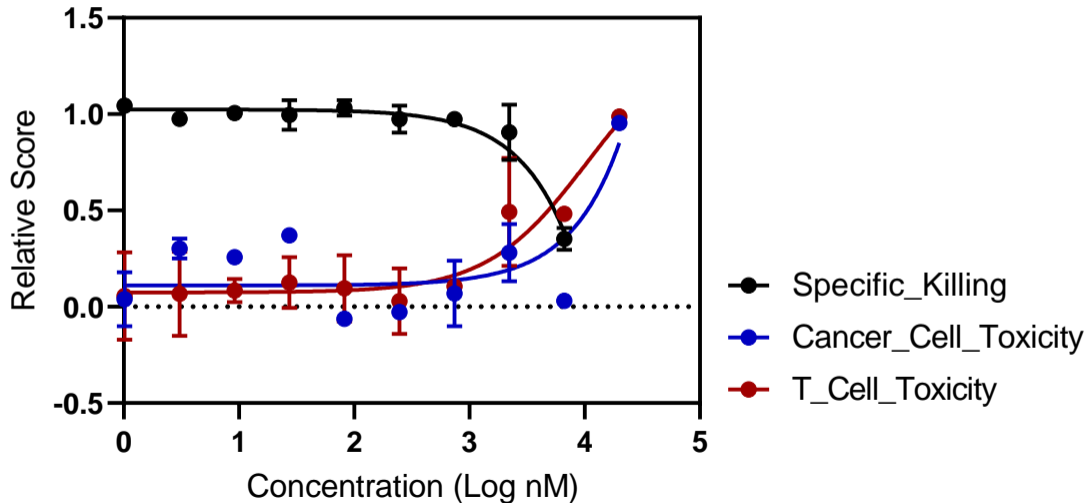

# NCGC00188636

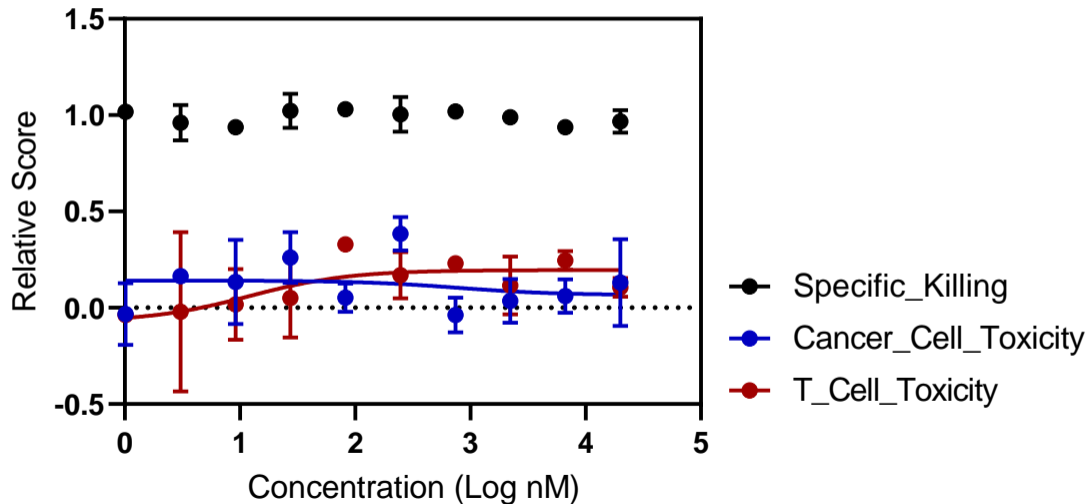

# NCT-503

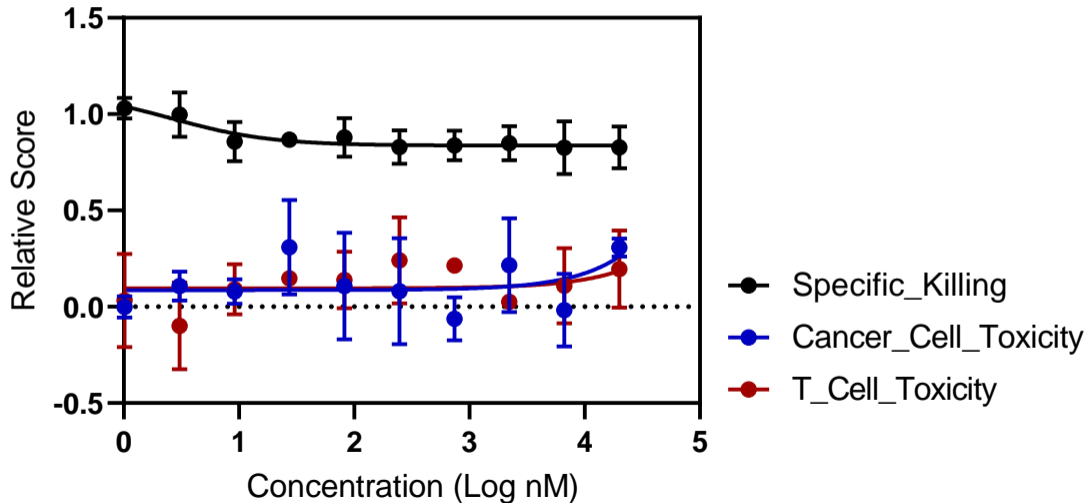

# ND-630

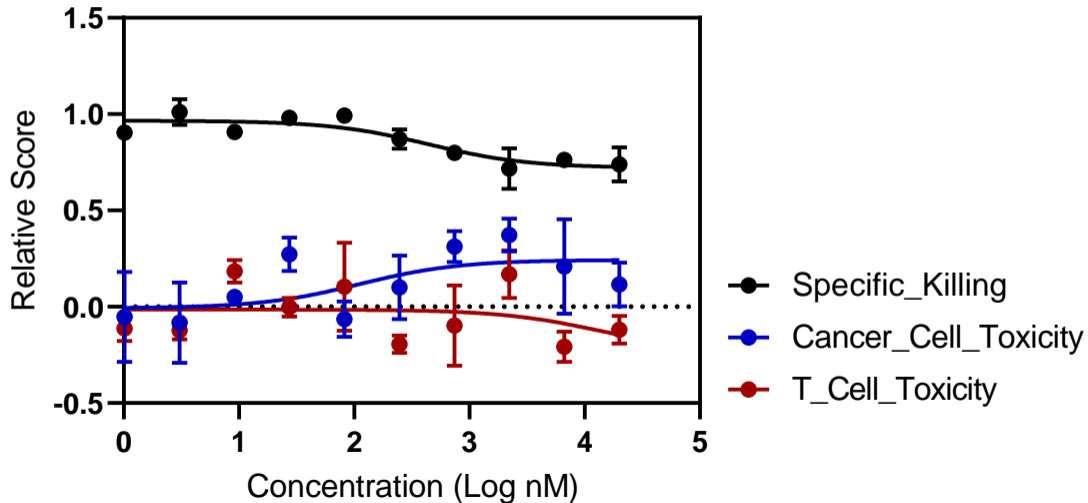

# Nitisinone

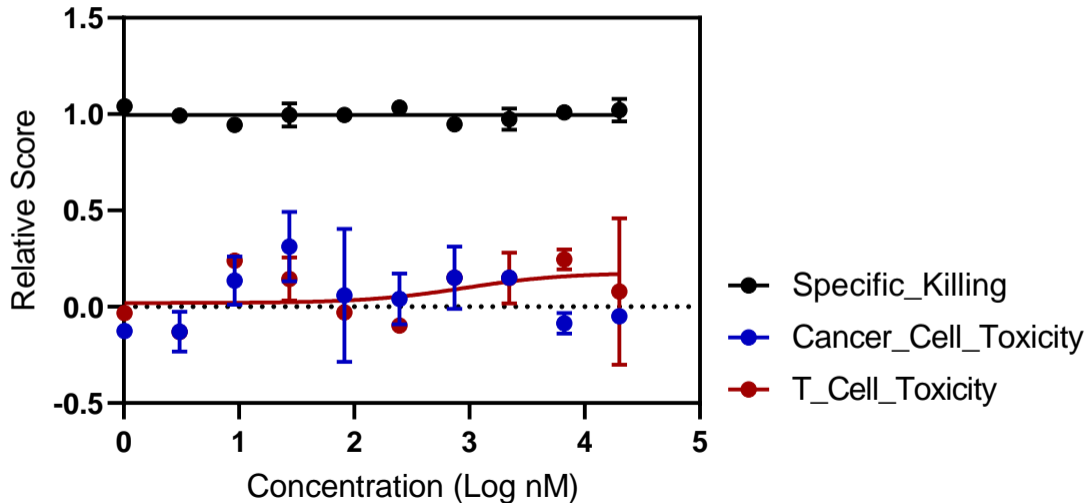

## Nomifensine maleate

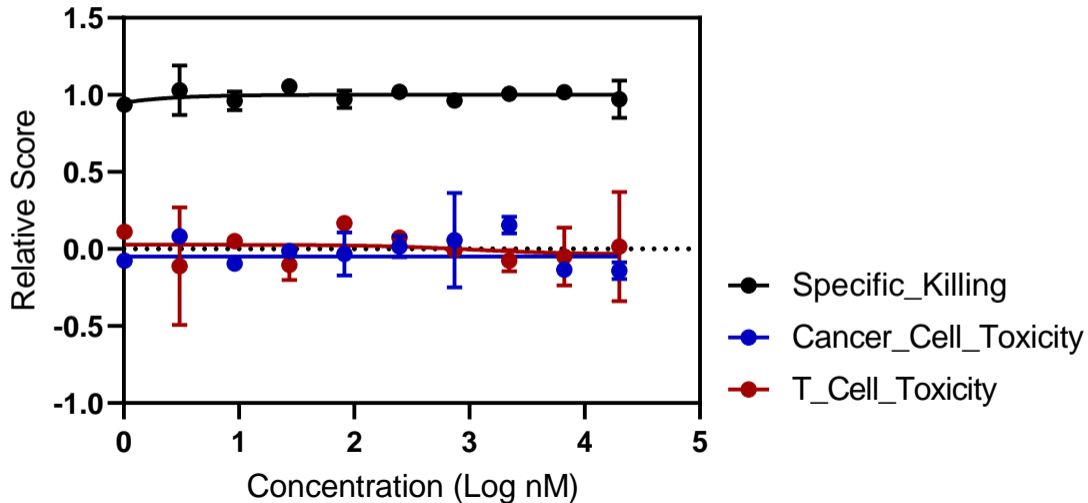

# NPP

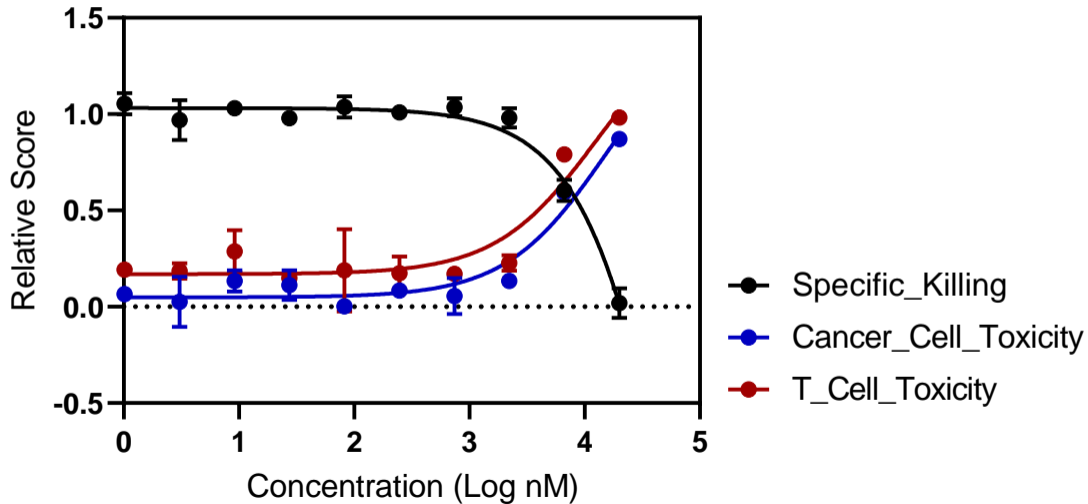

# Olaparib (AZD2281, Ku-0059436)

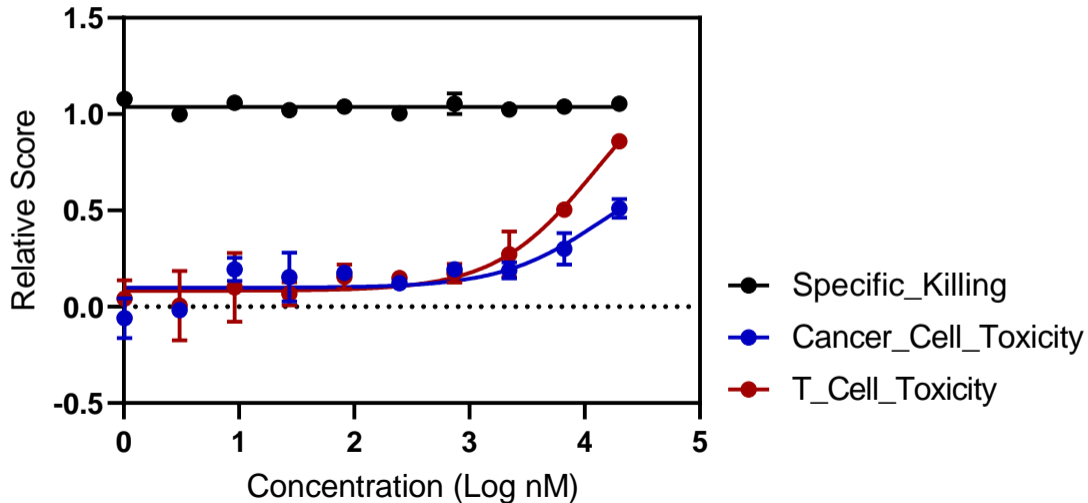



# Oleylethanolamide

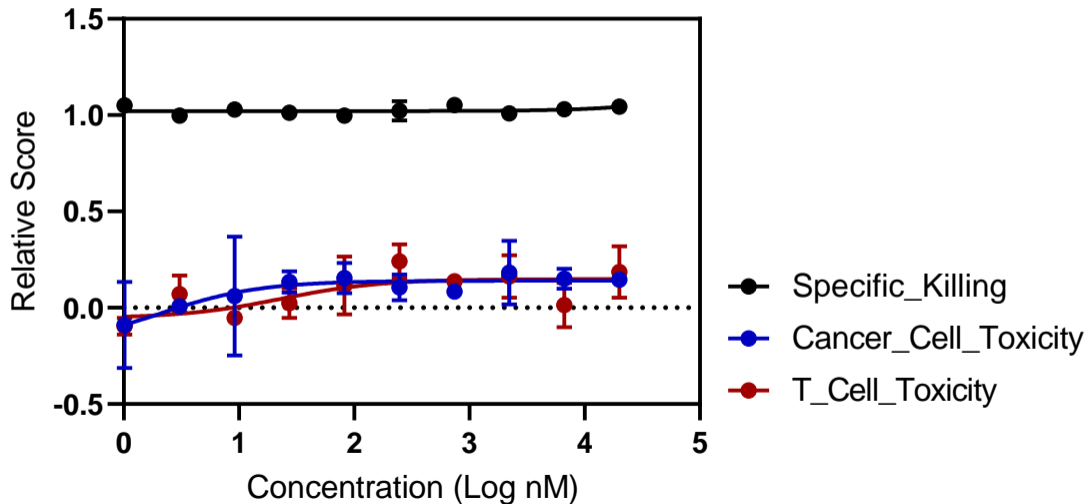

# Oligomycin A

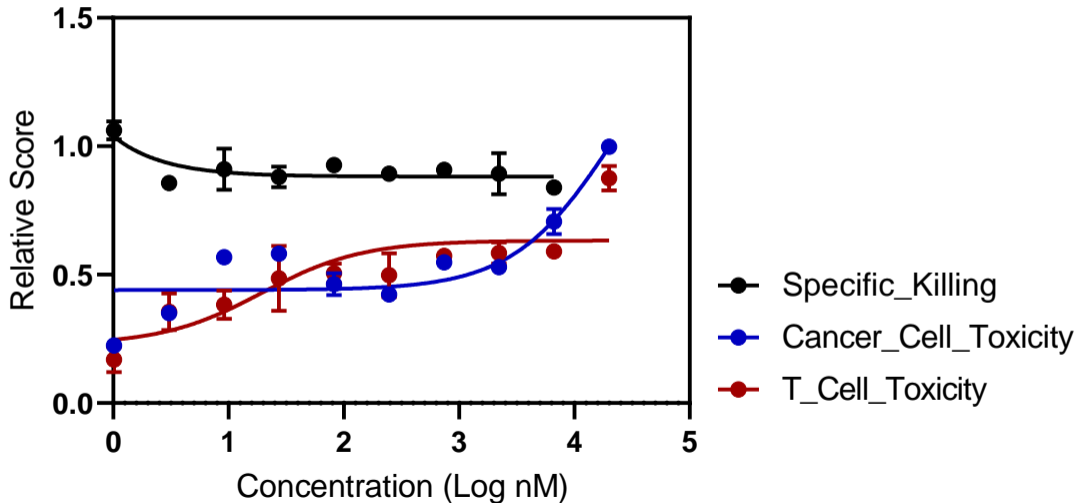

# ONC-201

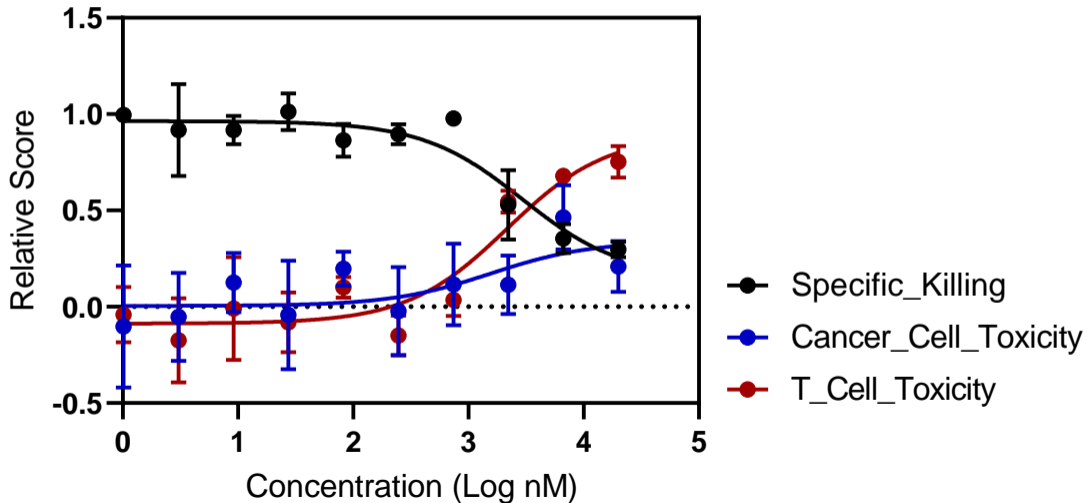

# Orlistat

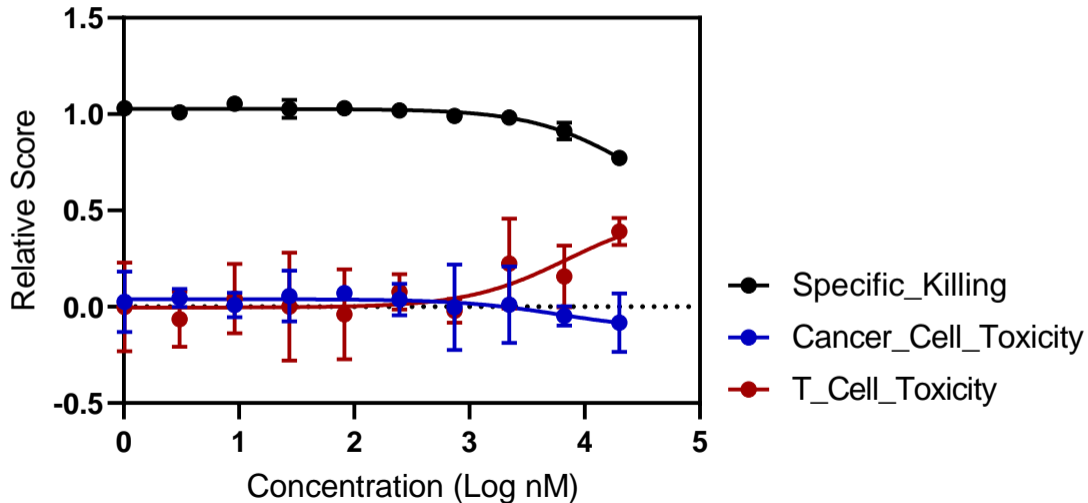

# PABA- NO

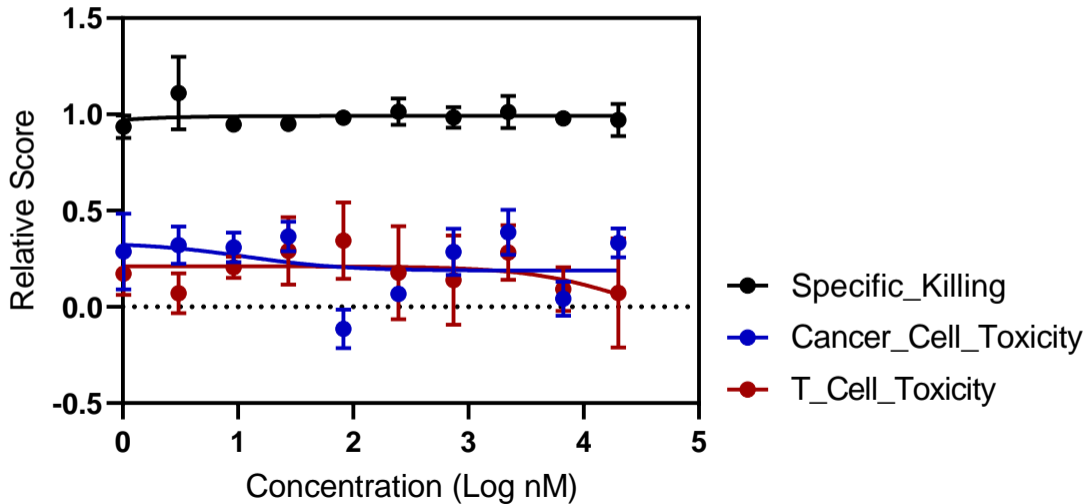

# Parthenolide

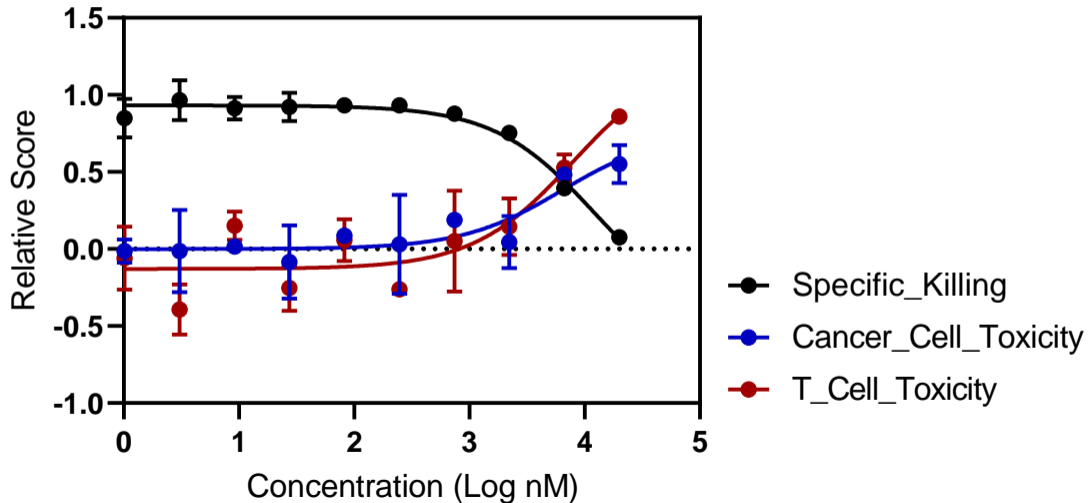

# Pentostatin

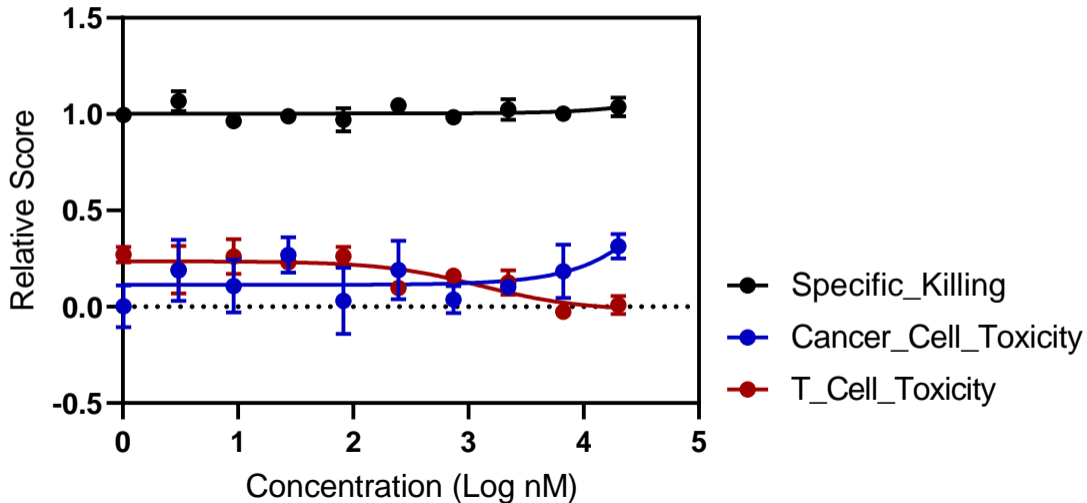

# PF 429242

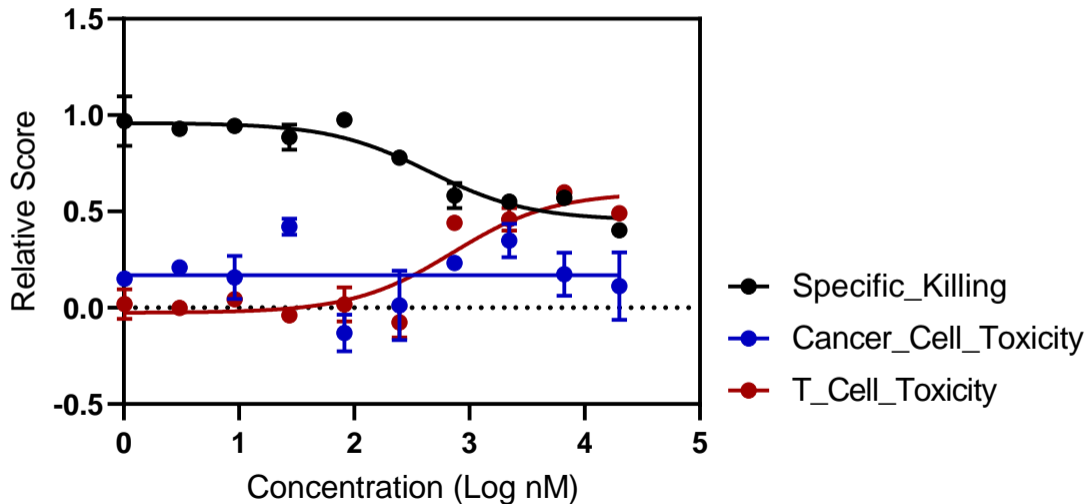



# PF 4981517

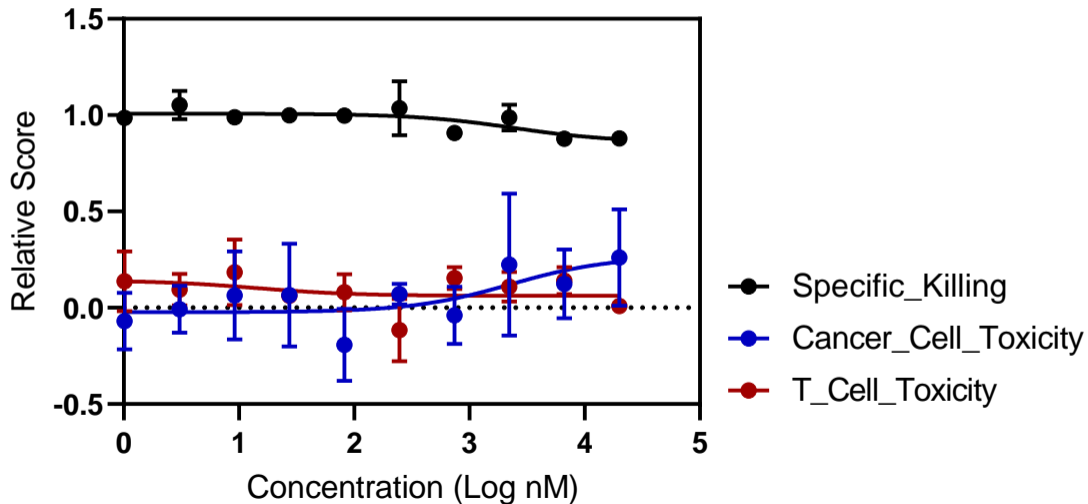

# PF 05175157

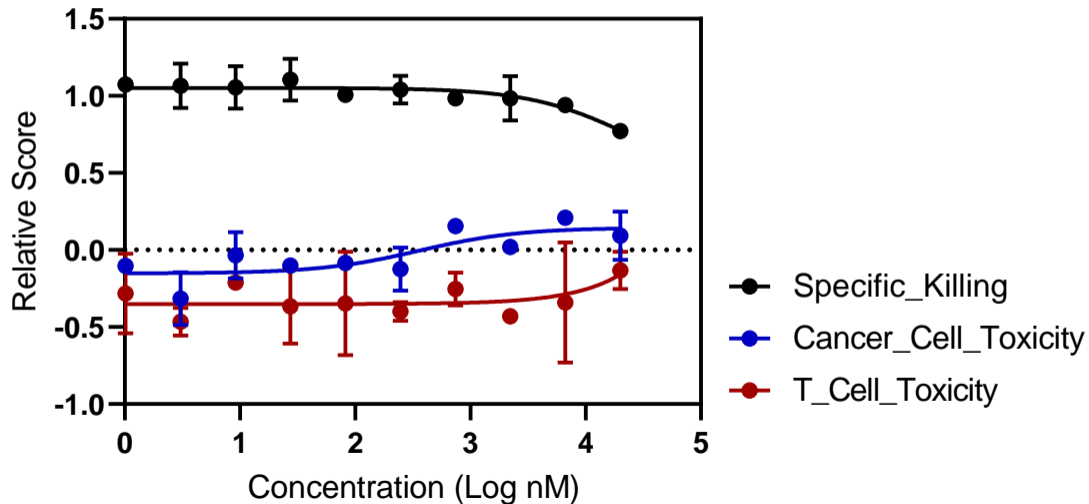

# PF-04620110

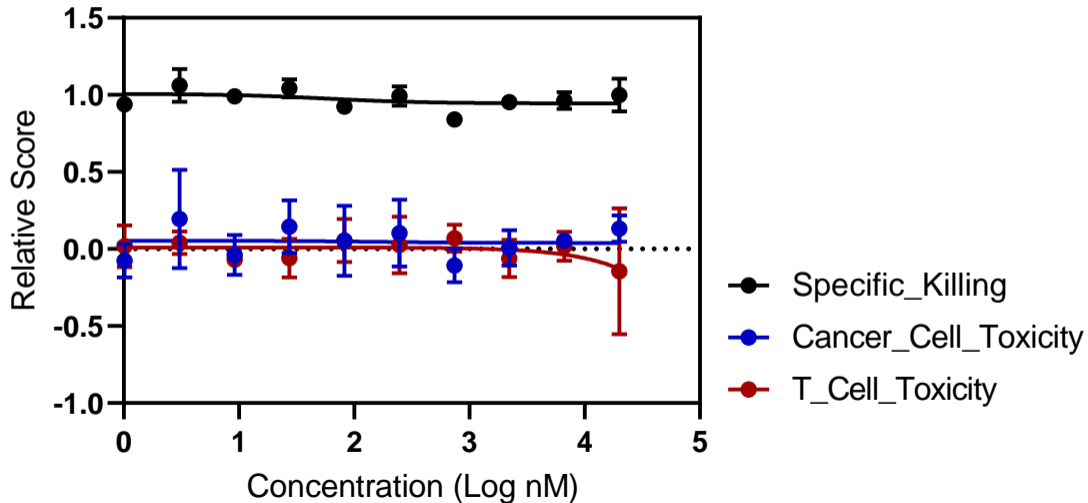

# Phenethyl isothiocyanate

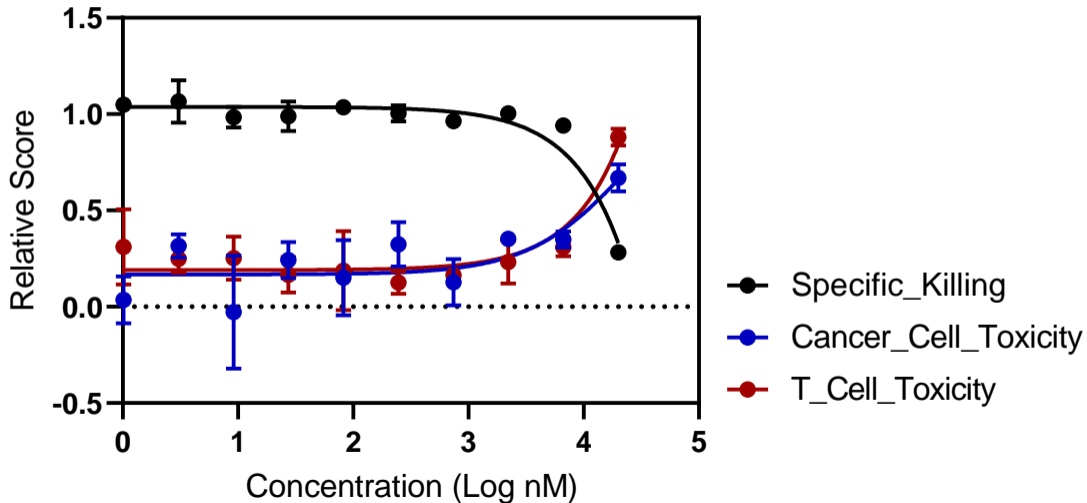

# Phenformin Hcl

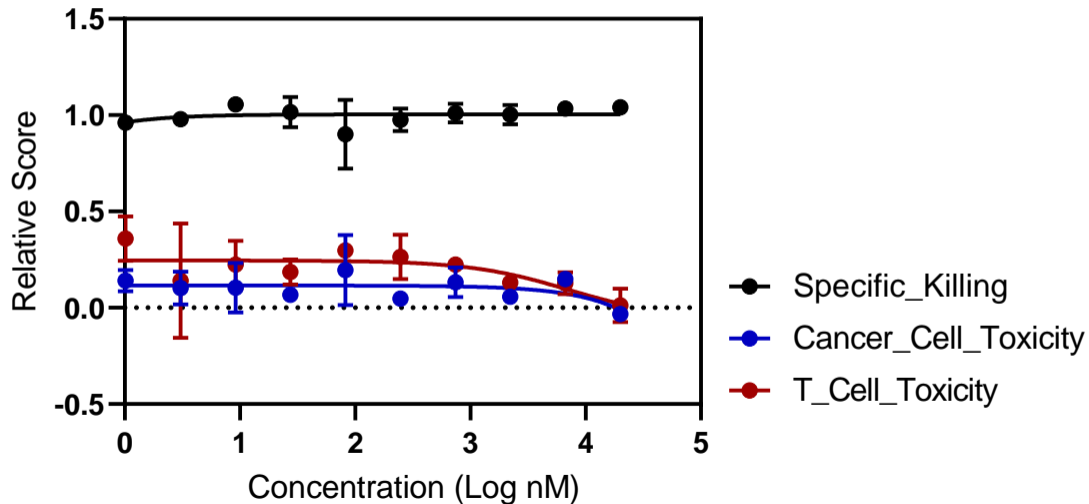

# Phyiscion

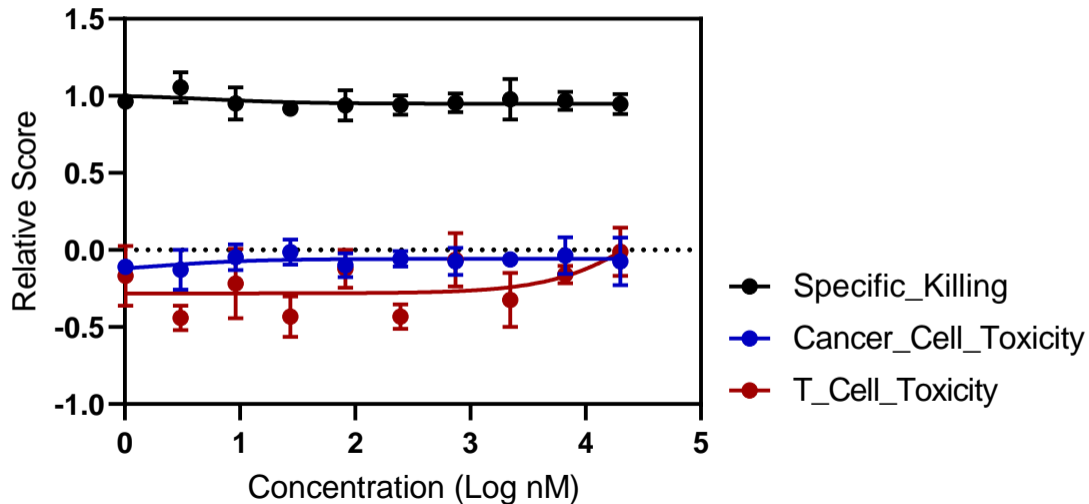

# Pioglitazone HCl

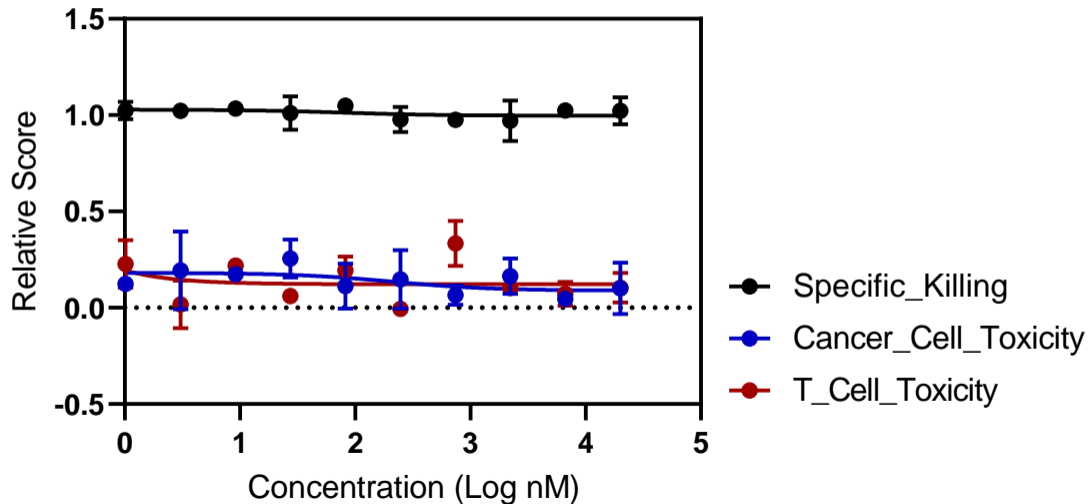

# Piperlongumine

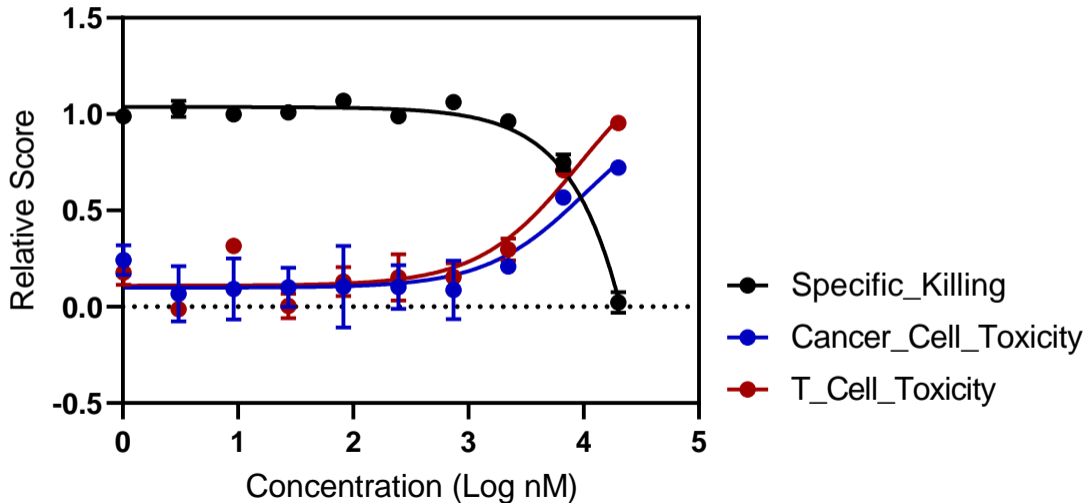



# PK 11195

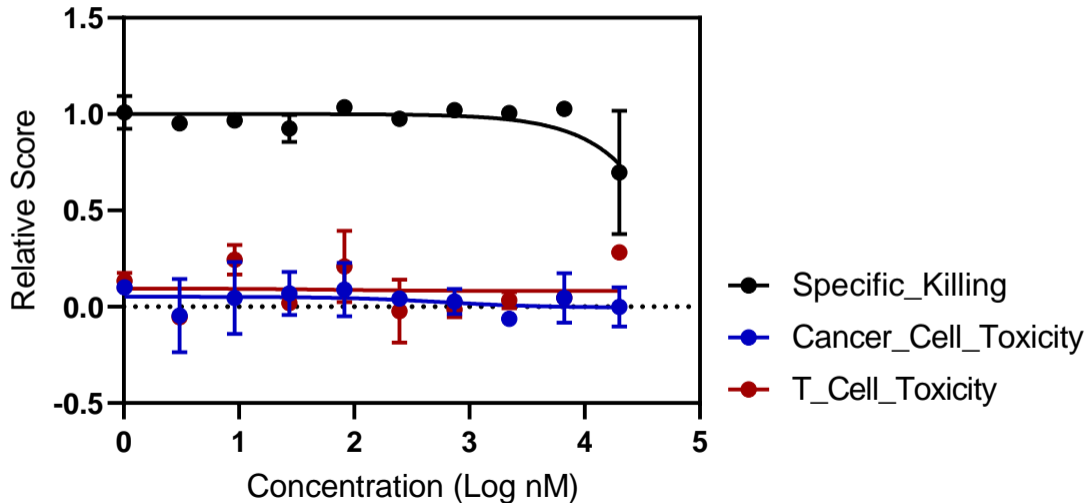

# Plumbagin

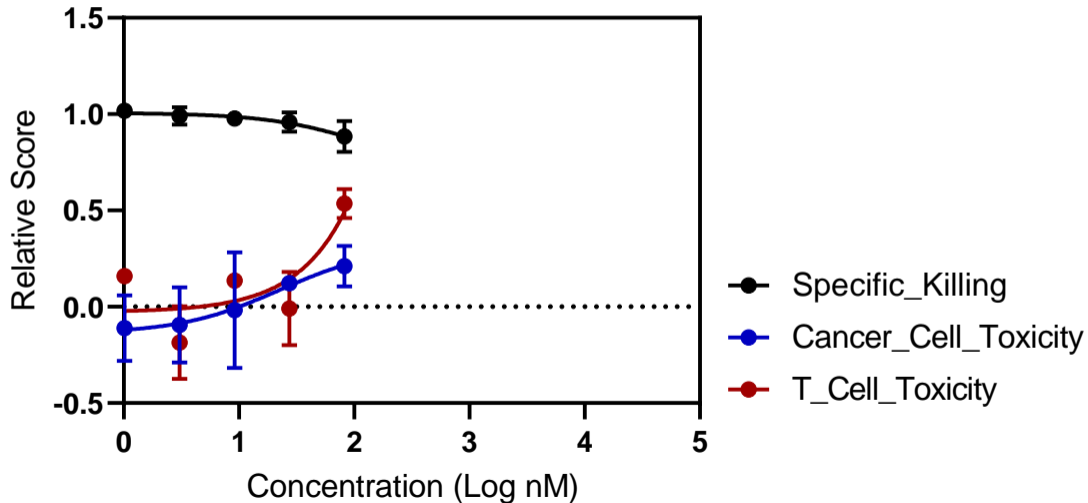

# PluriSIn 1

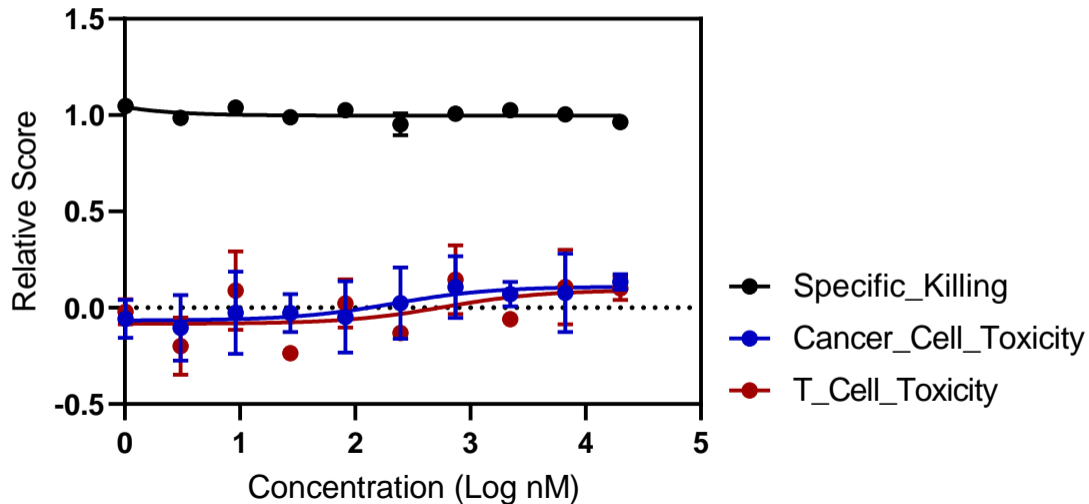

# PR-619

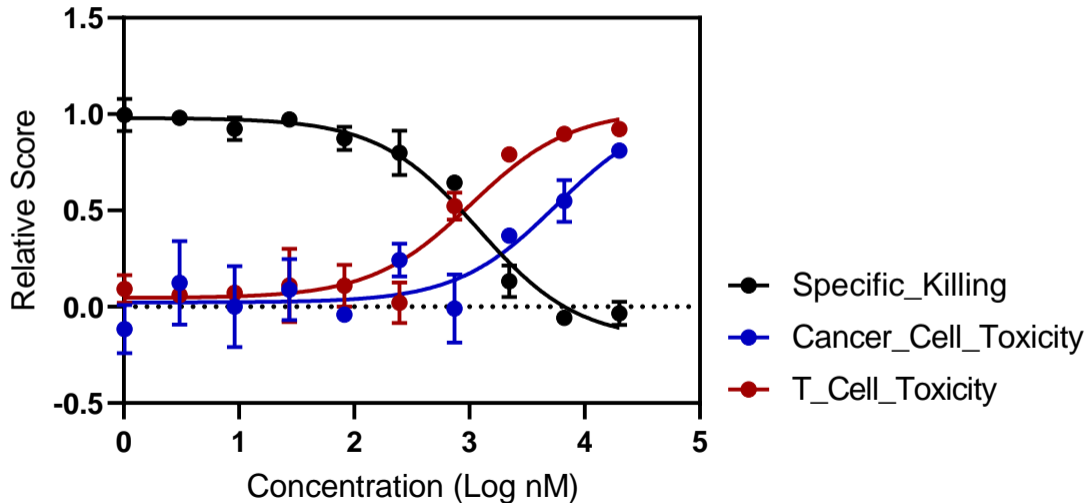

## Pravastatin sodium salt

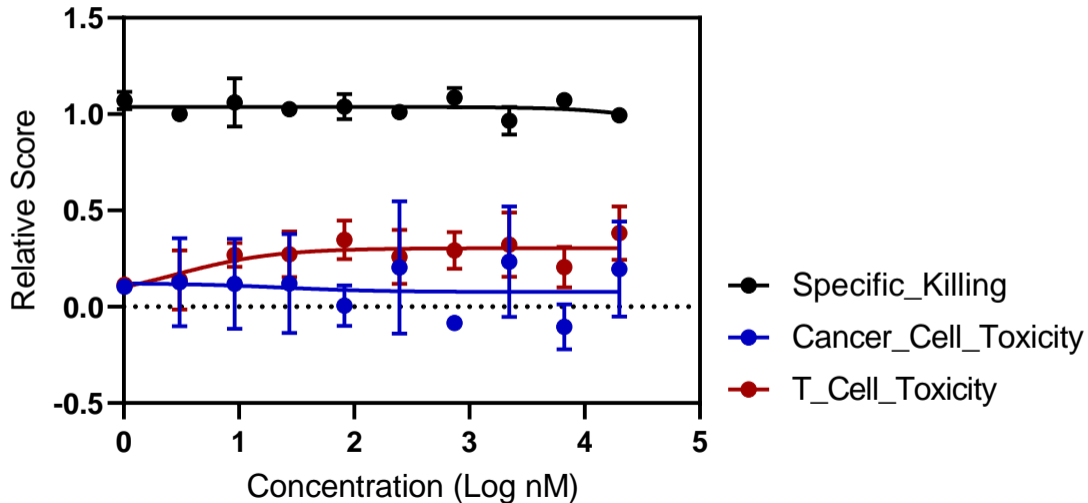

# PX 12

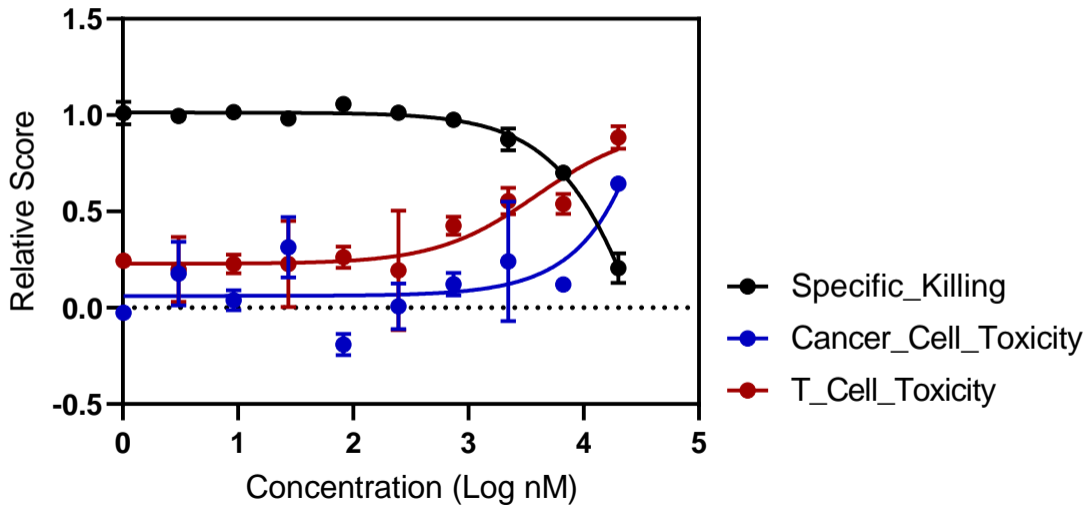

# Pyrazofurin

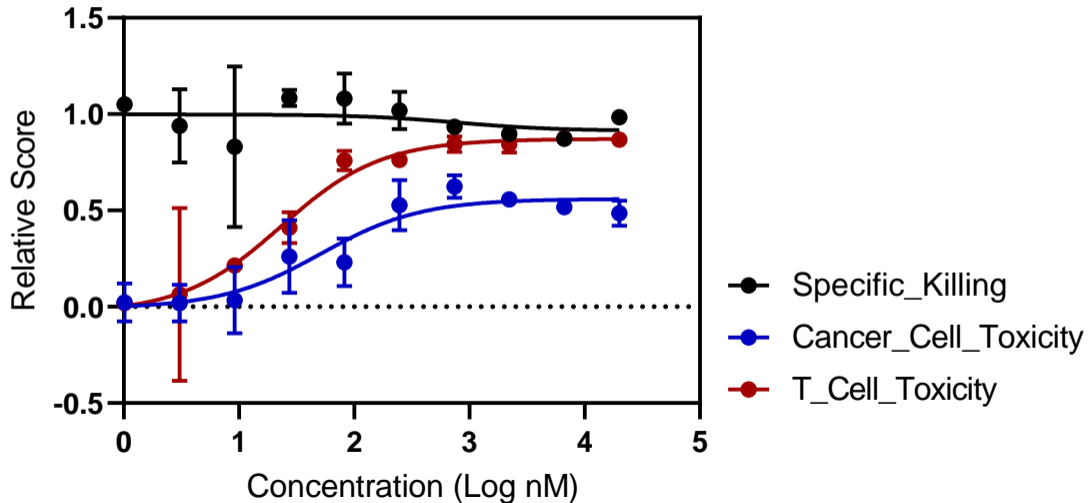

# Pyrimethamine

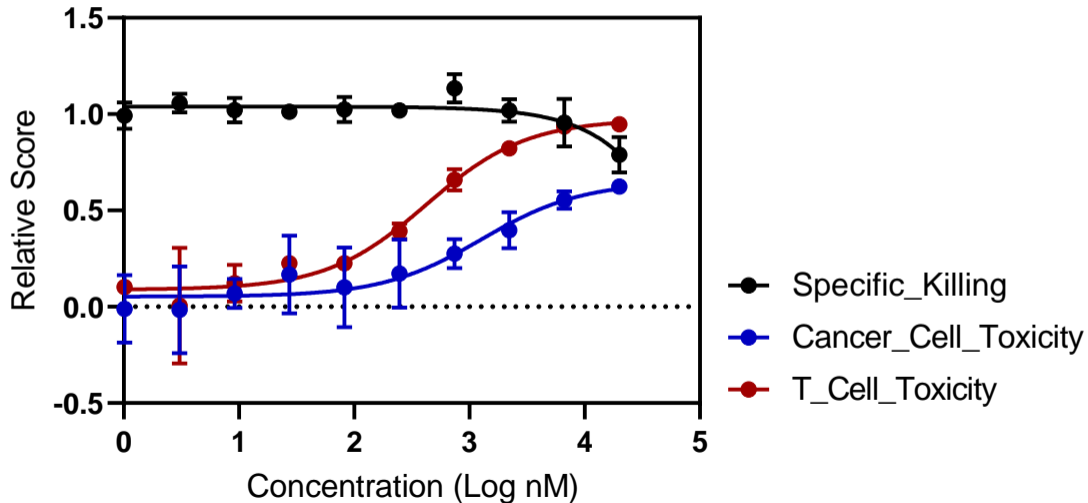



# Pyrrvinium pamoate salt hydrate

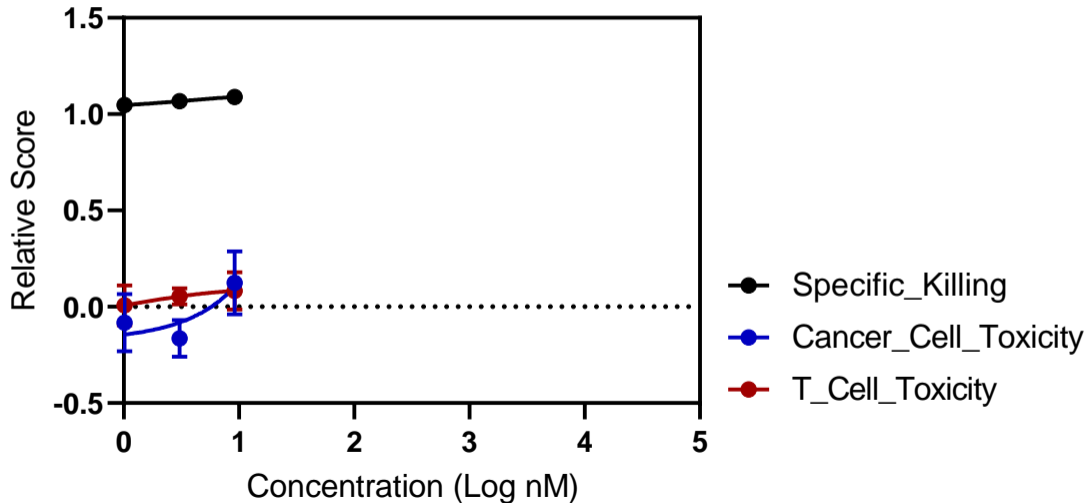

# Raltitrexed

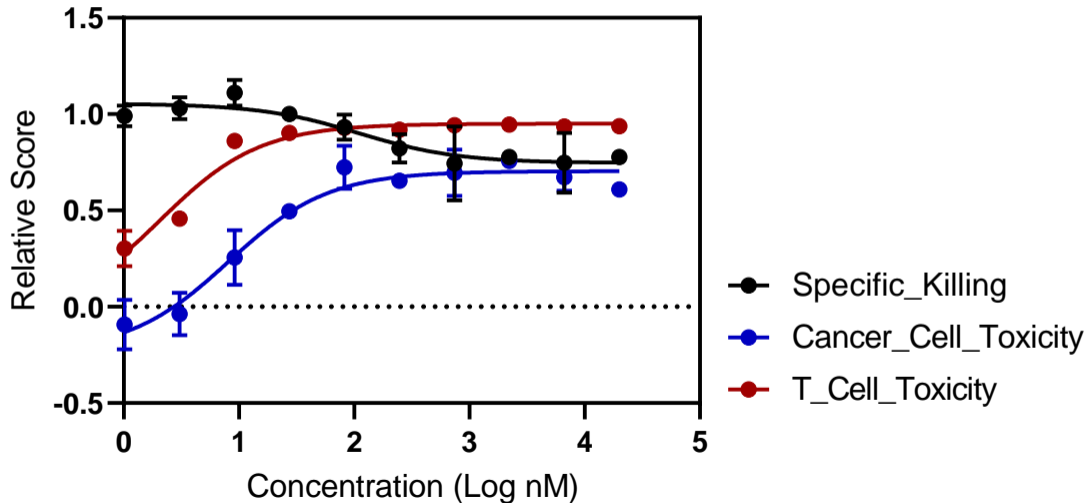

# Ranolazine dihydrochloride

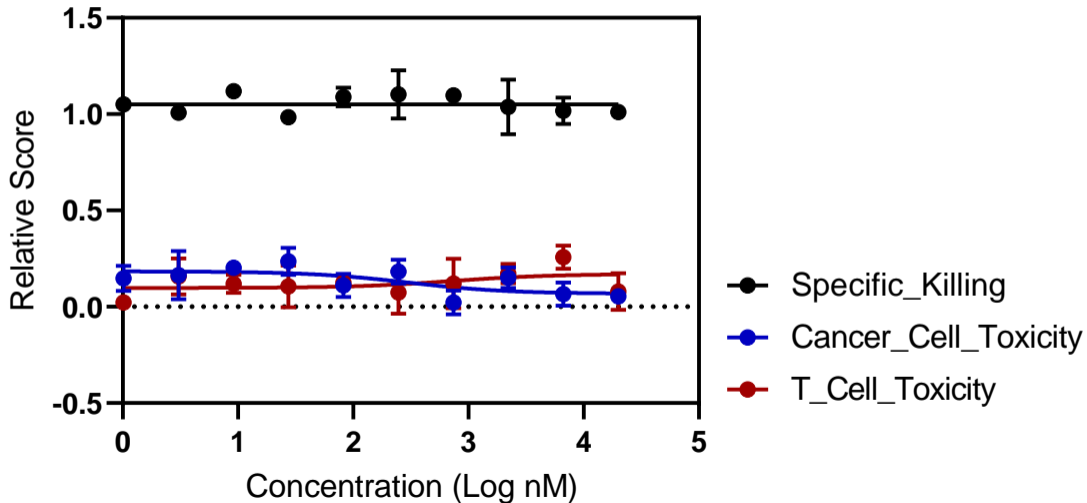

# Resveratrol

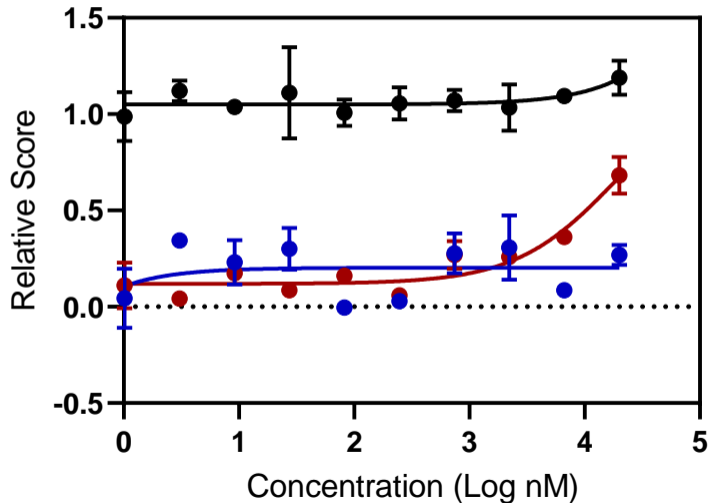

## Ro 48-8071 fumarate

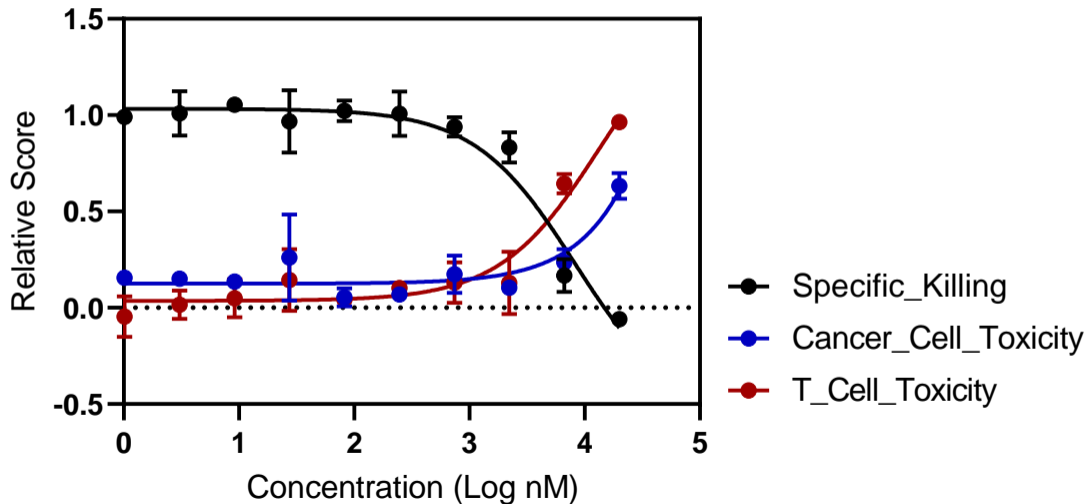

# Rosiglitazone HCl

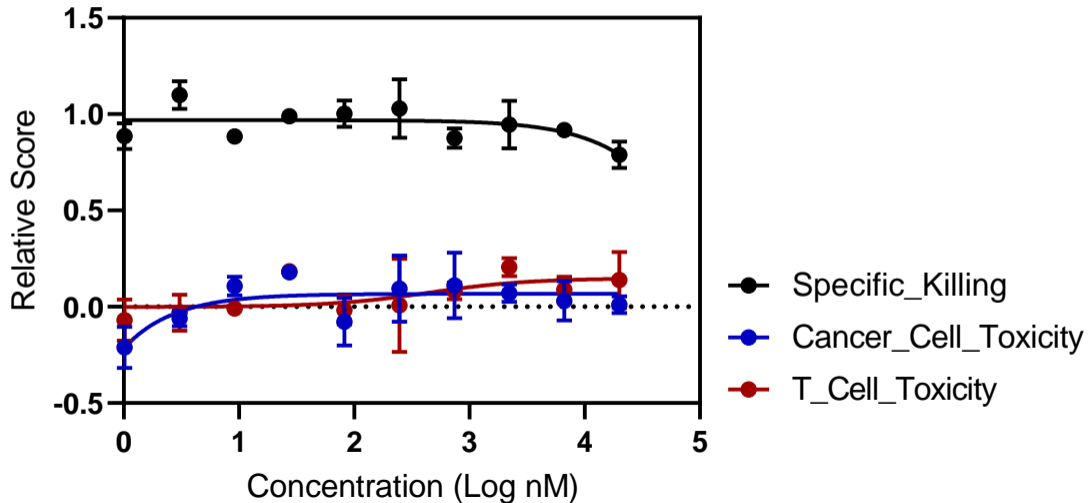

# Rosuvastatin Calcium

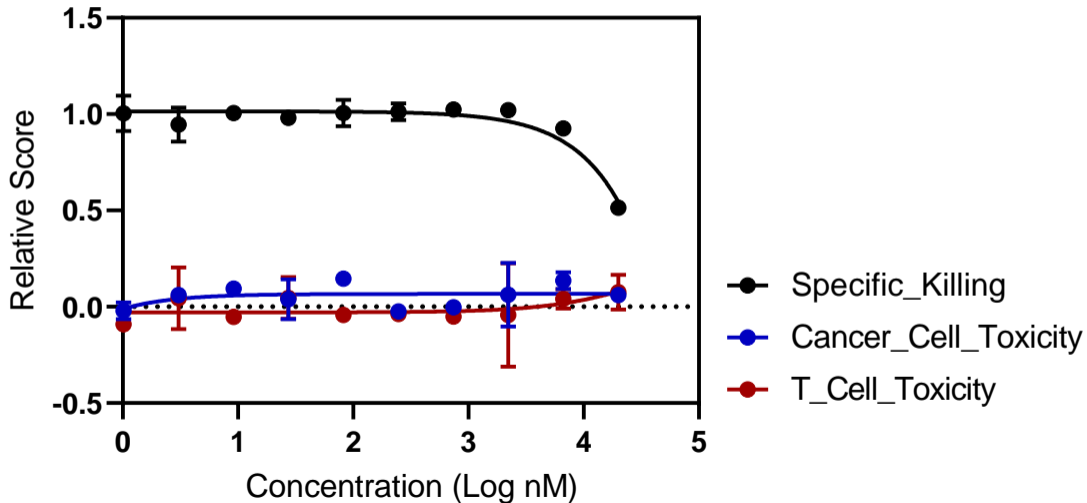

# Rotenone

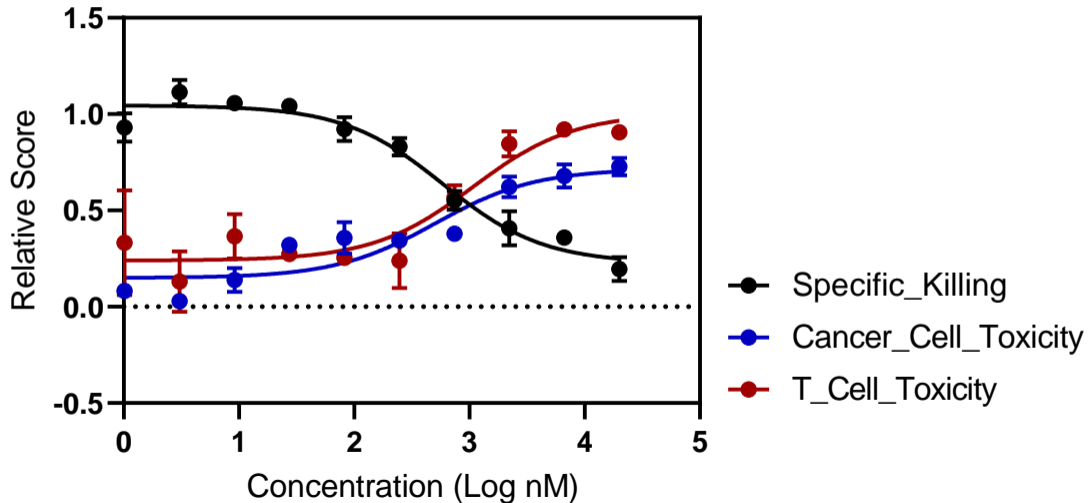



# Rottlerin

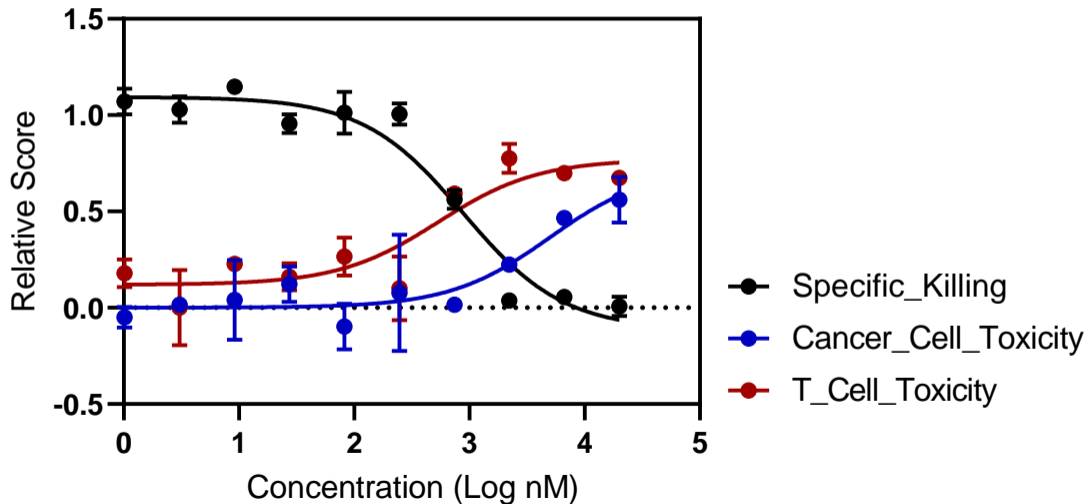

# SB 204990

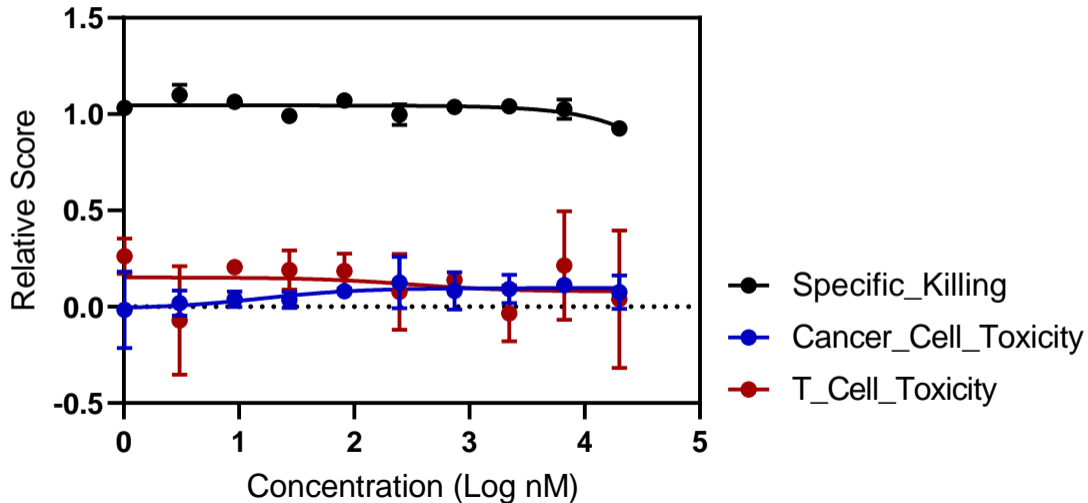

# SC 26196

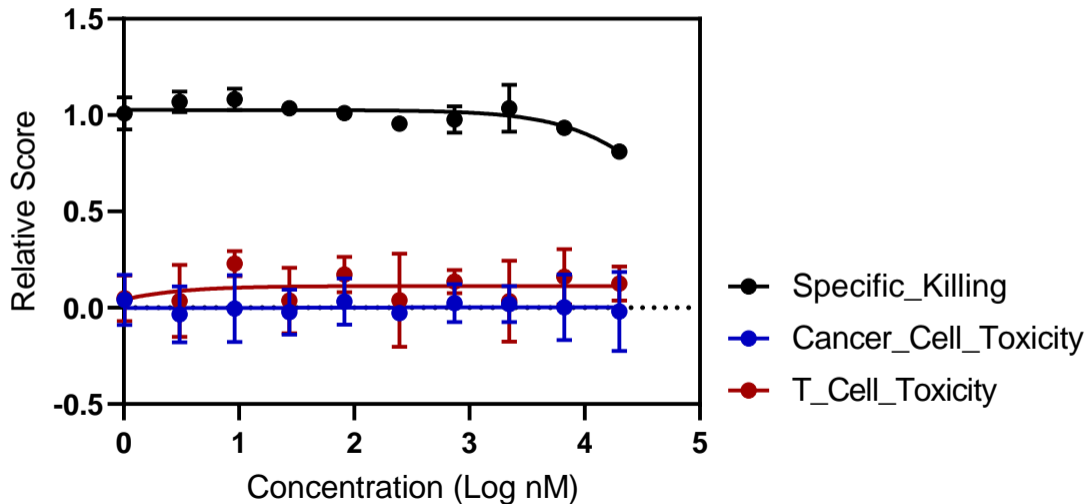

# Shogaol

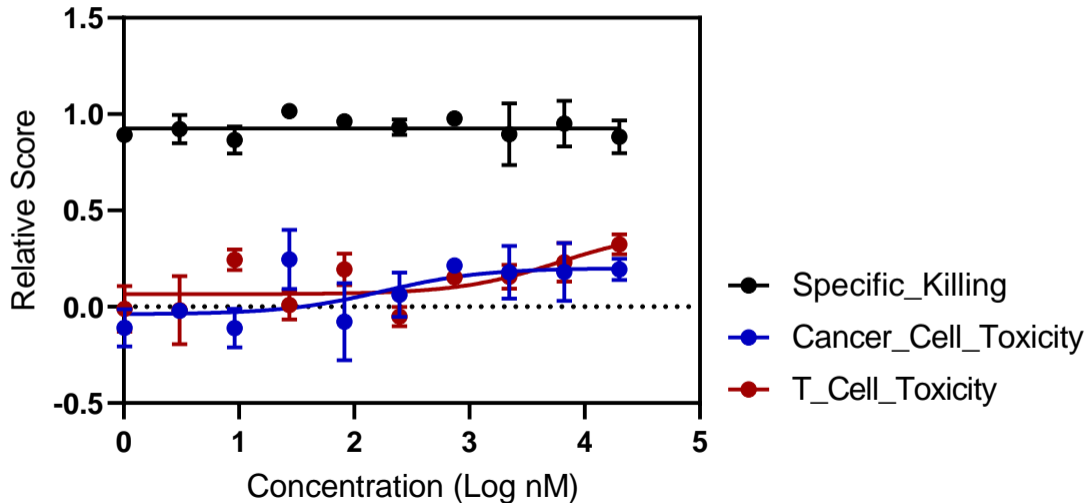

# SKI II

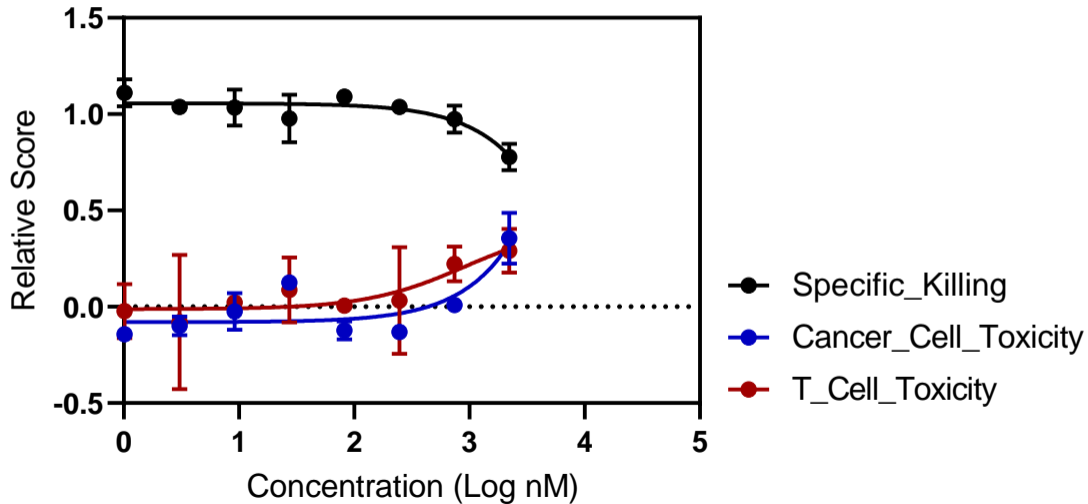

# Sodium Azide

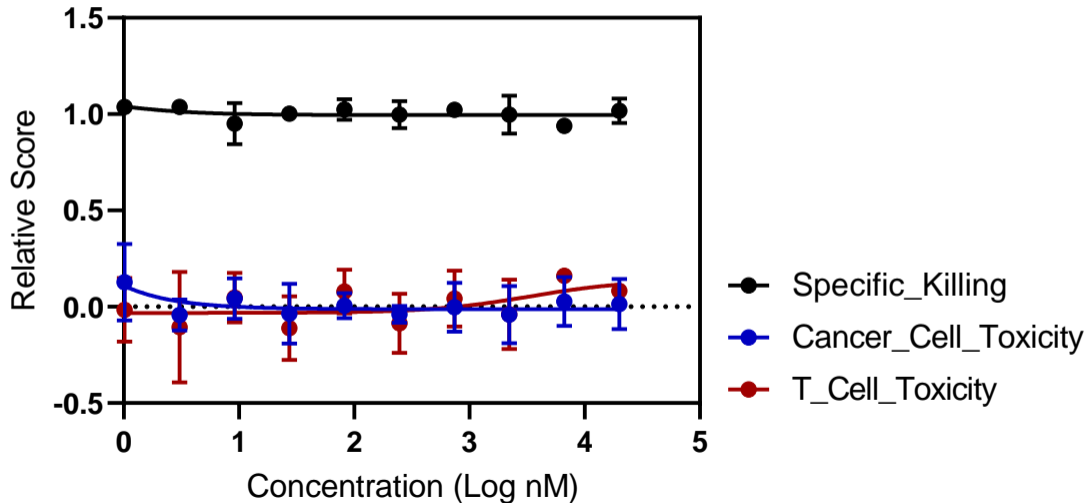

# Spautin 1

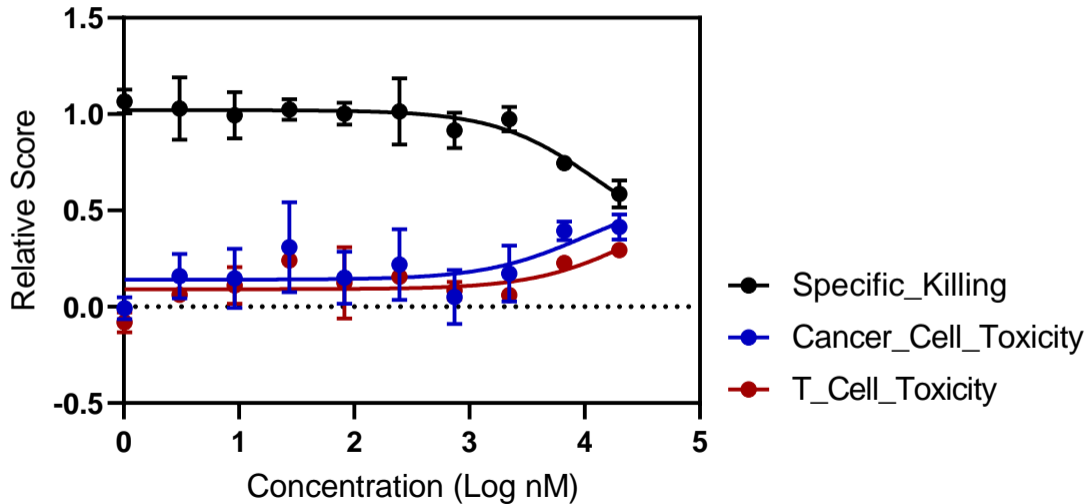

# STF 31

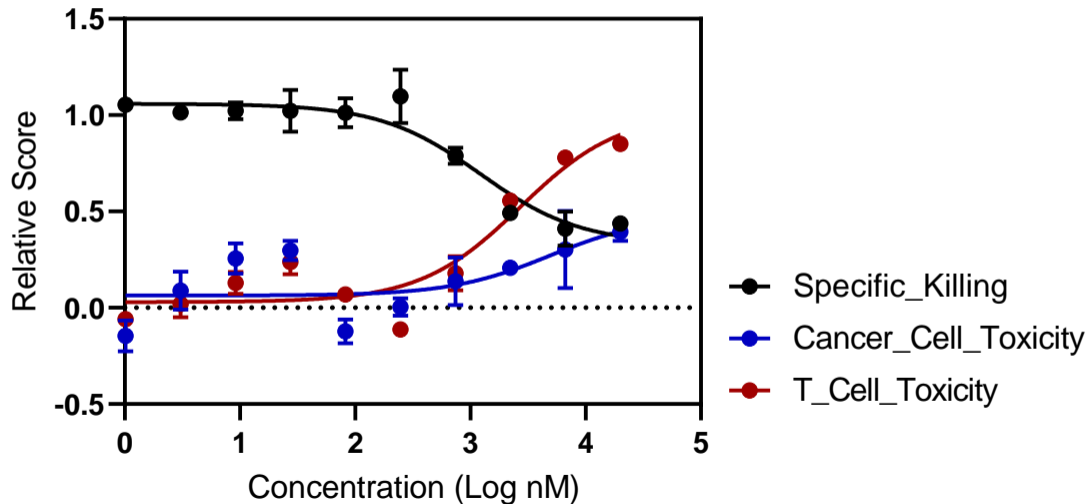



# Streptozocin

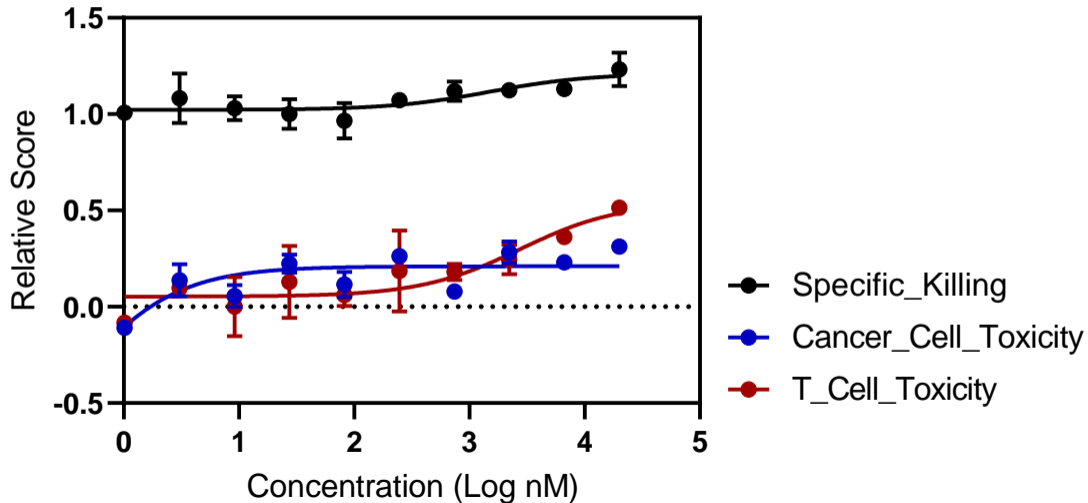

# Sulfasalazine

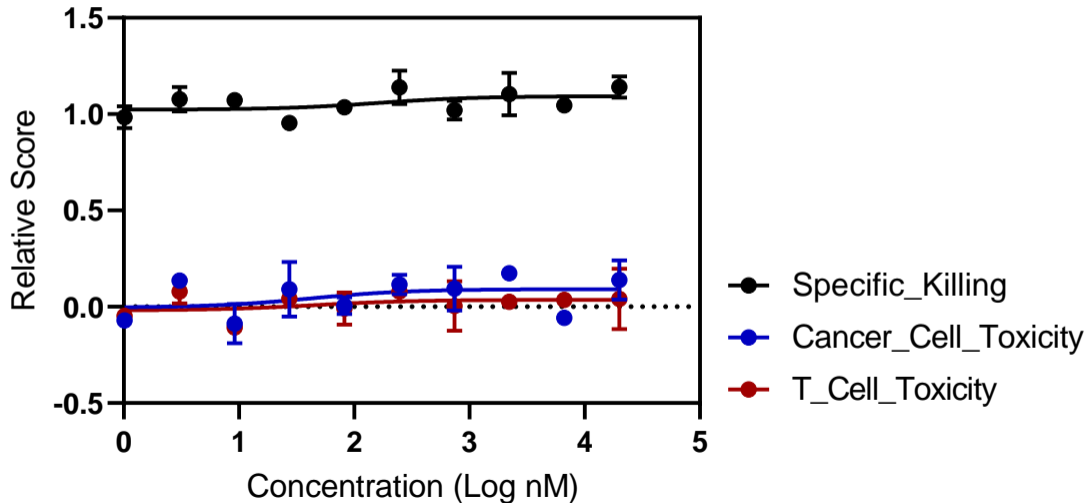

# Sulforaphan e

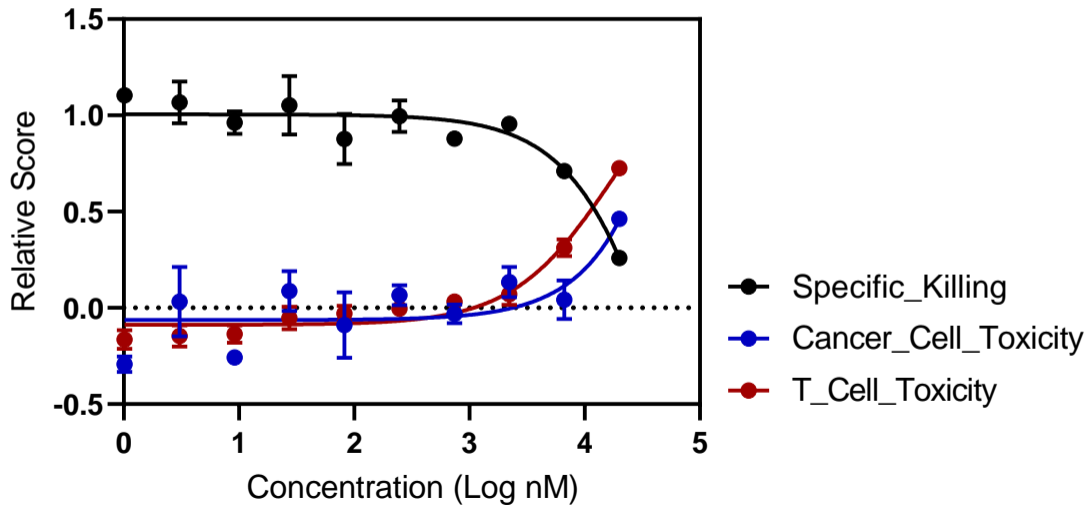

# Sulindac

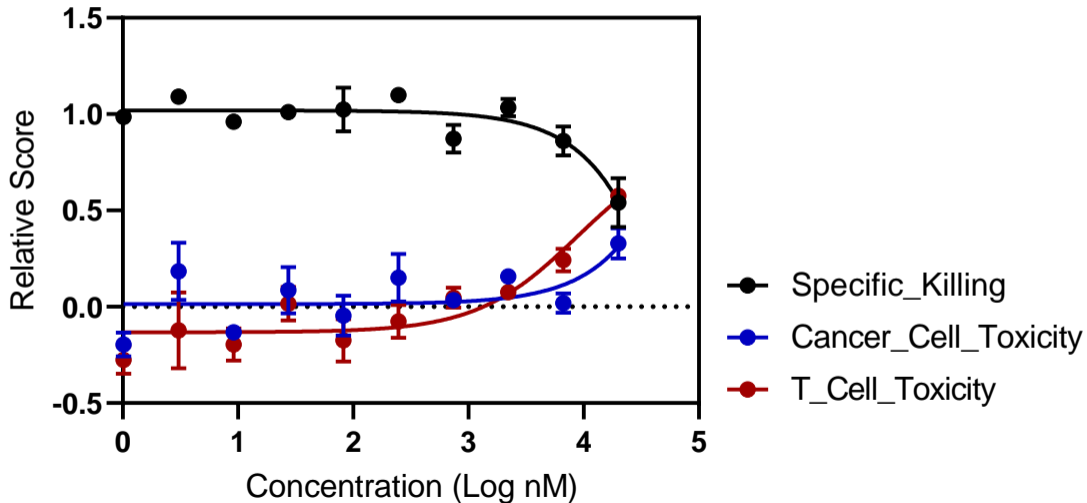

# Swainsonine

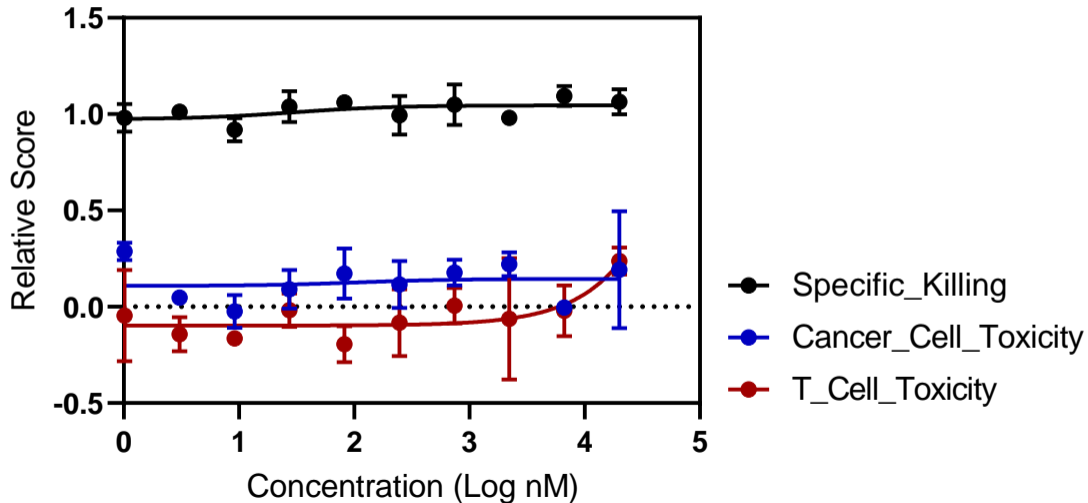

## TAK-700 (Orteronel)

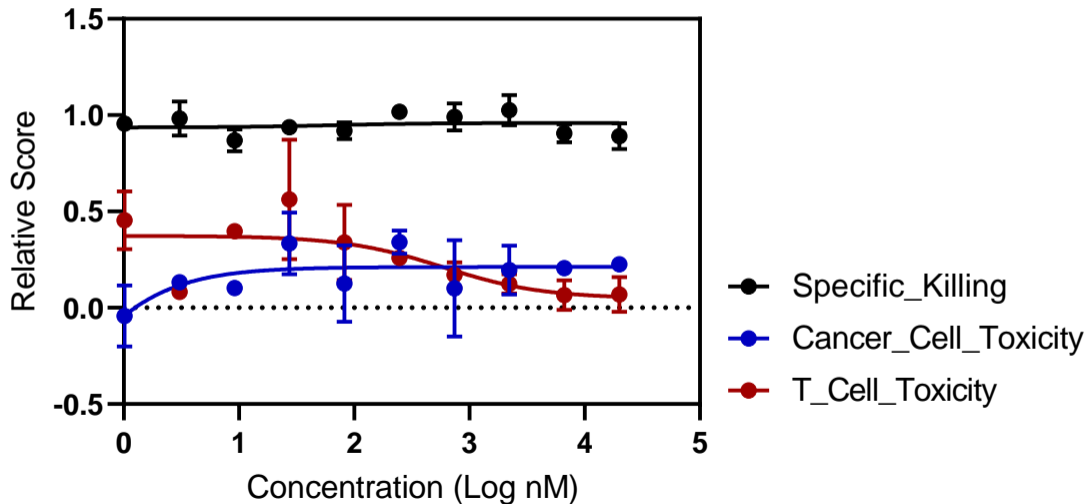

# Taxol

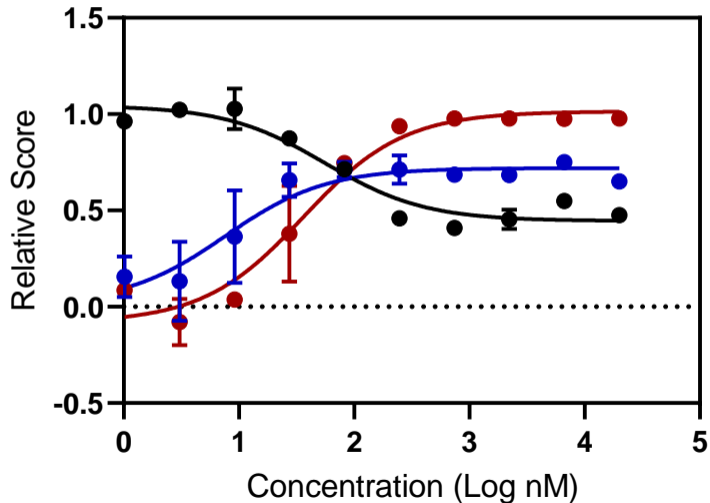

- Specific\_Killing
- Cancer\_Cell\_Toxicity
- T\_Cell\_Toxicity

# TC-G 1005

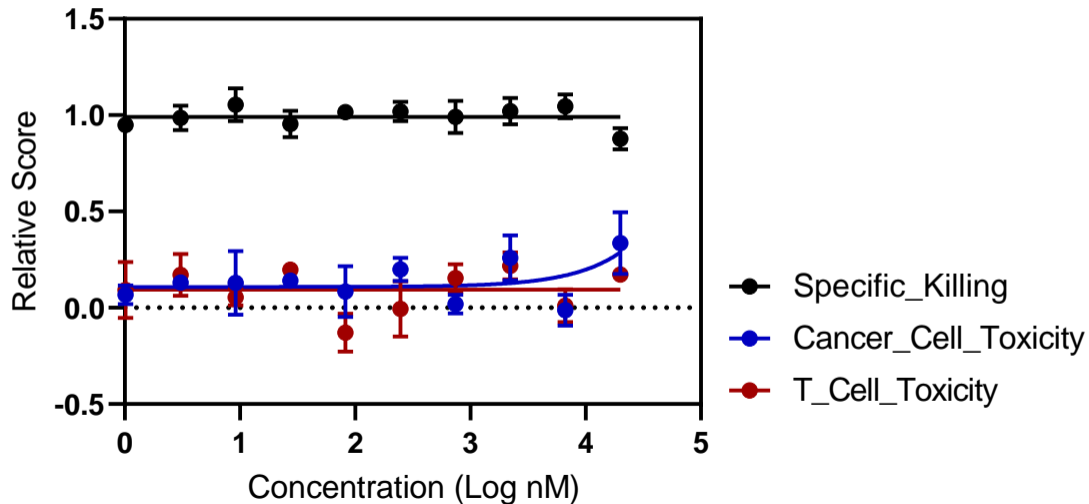



# Telintra

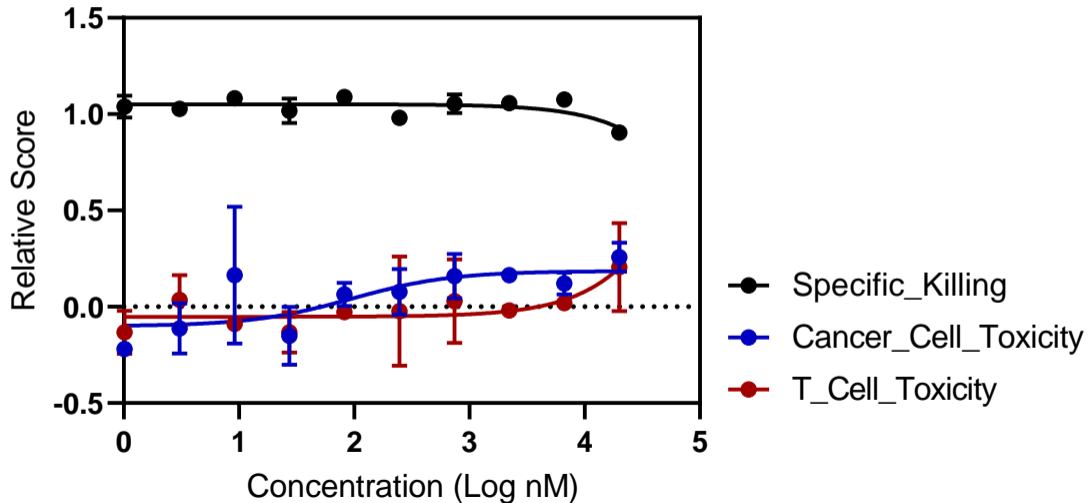

# TEPP-4 6

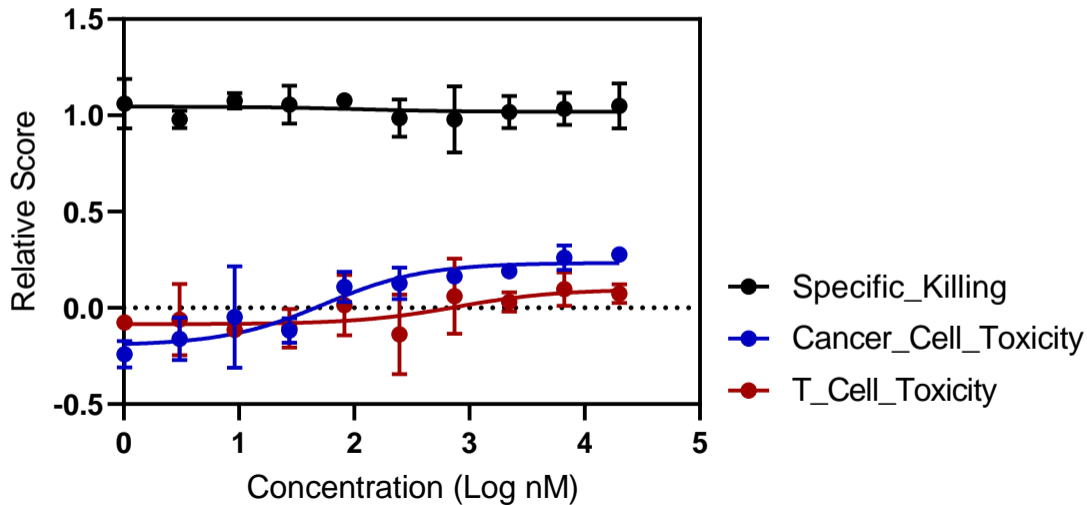

# Terbinafine HCl

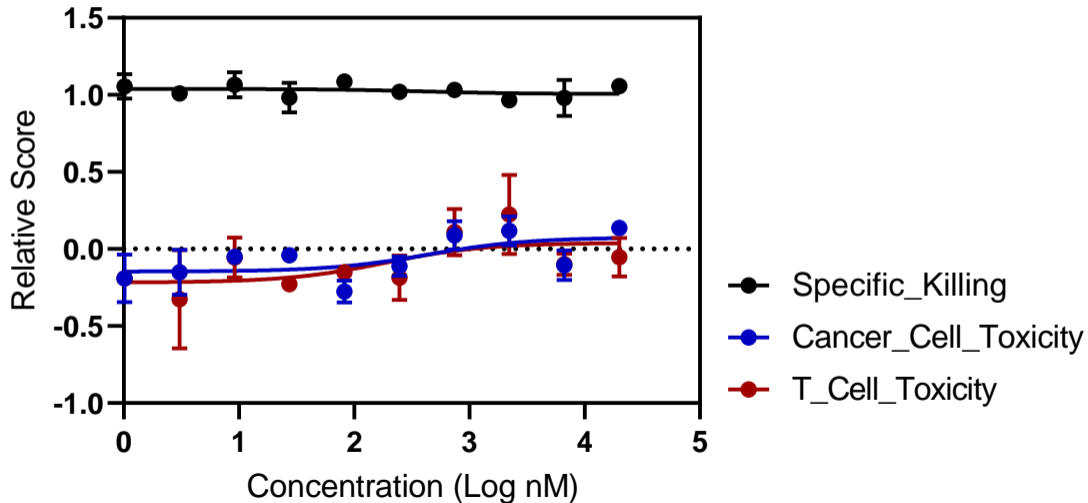

# Teriflunomide

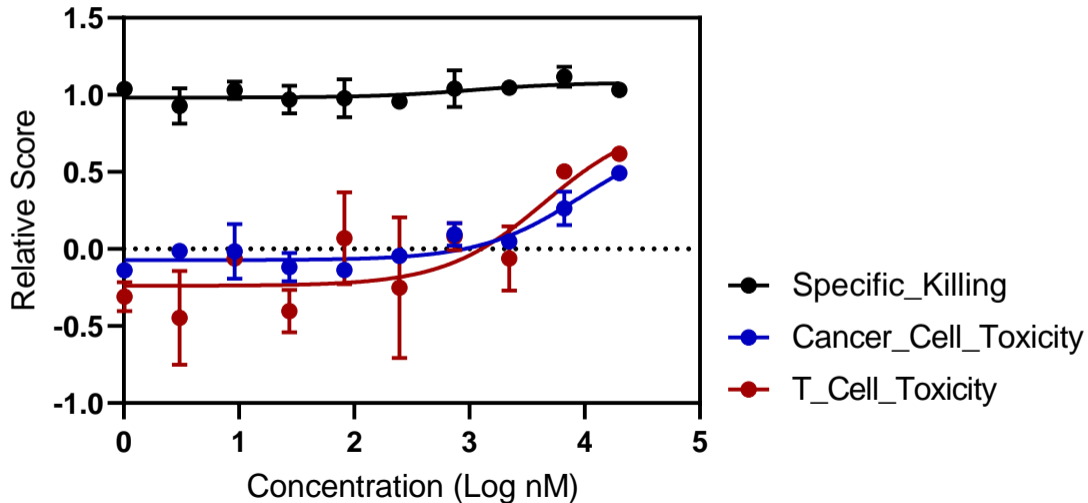

# Thapsigargin

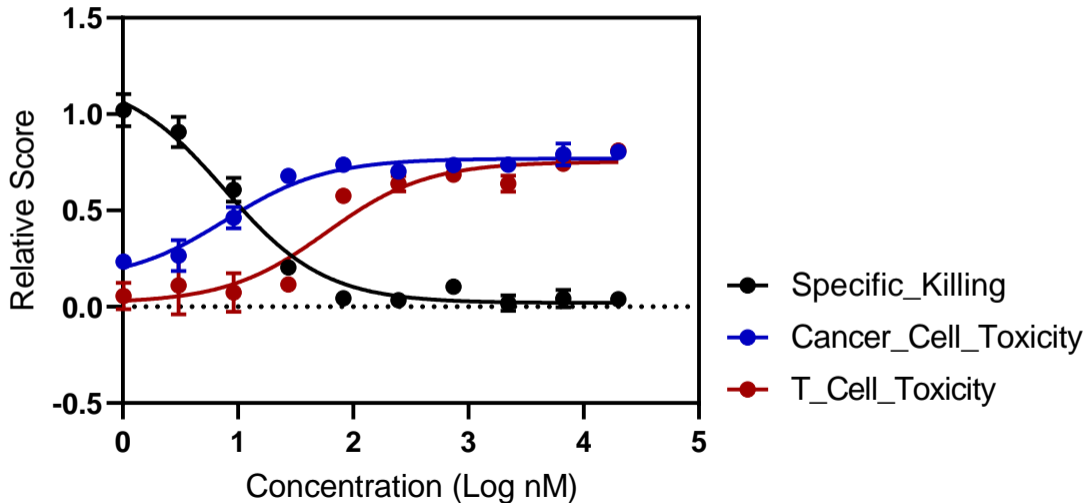

# TMS

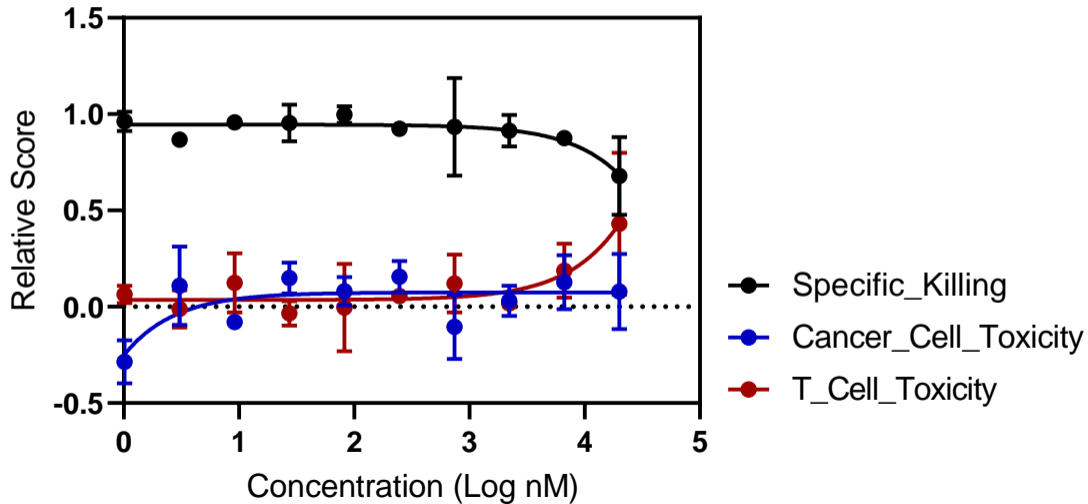

# TOFA

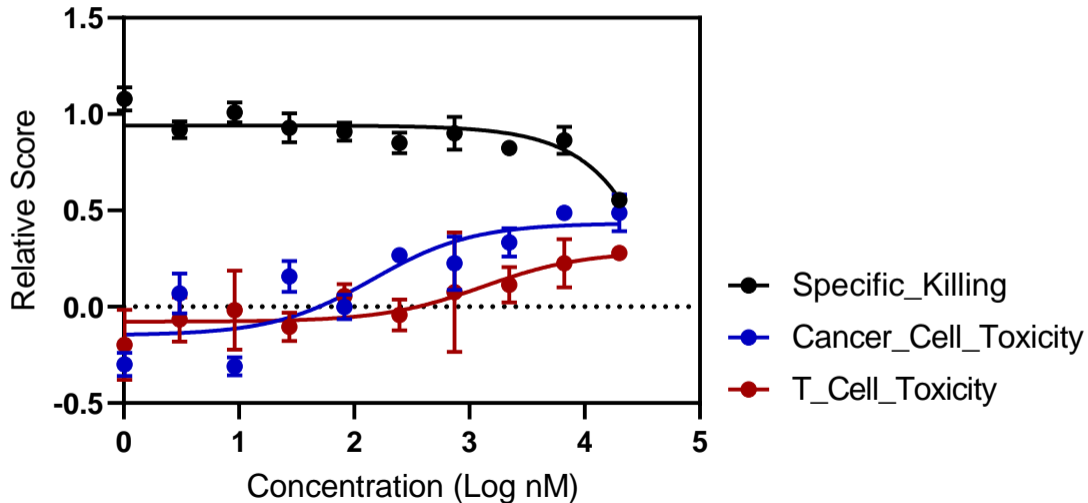

# Tofogliflozin hydrate

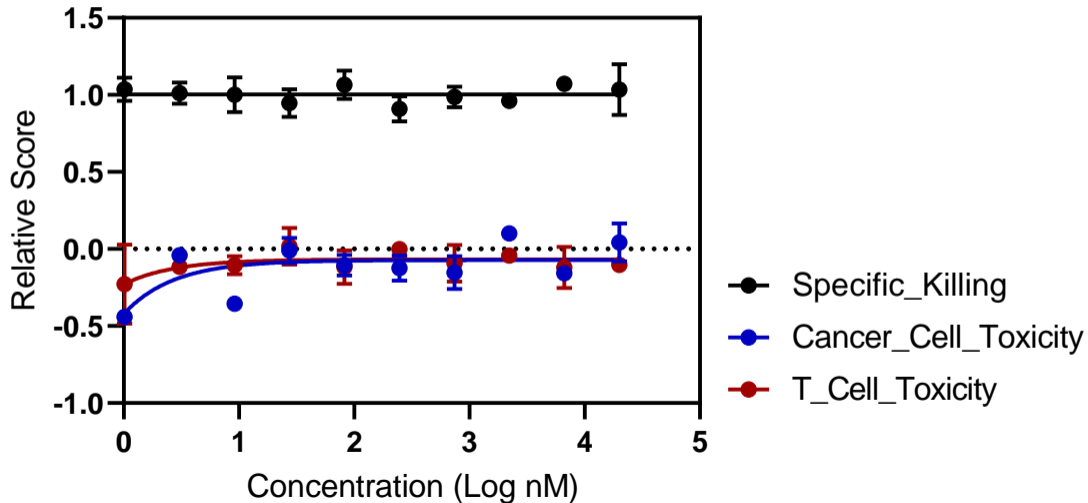



# Tolcapone

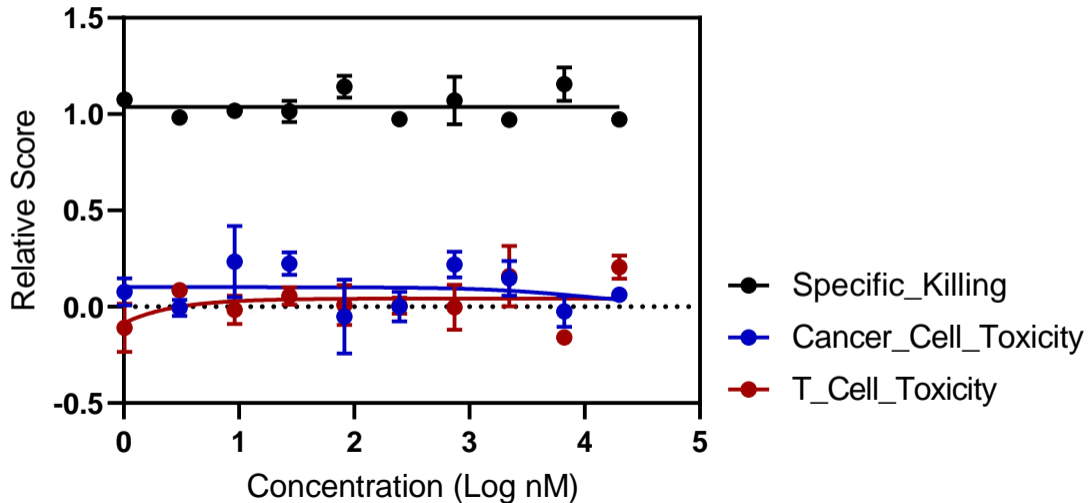

# Torcetrapib

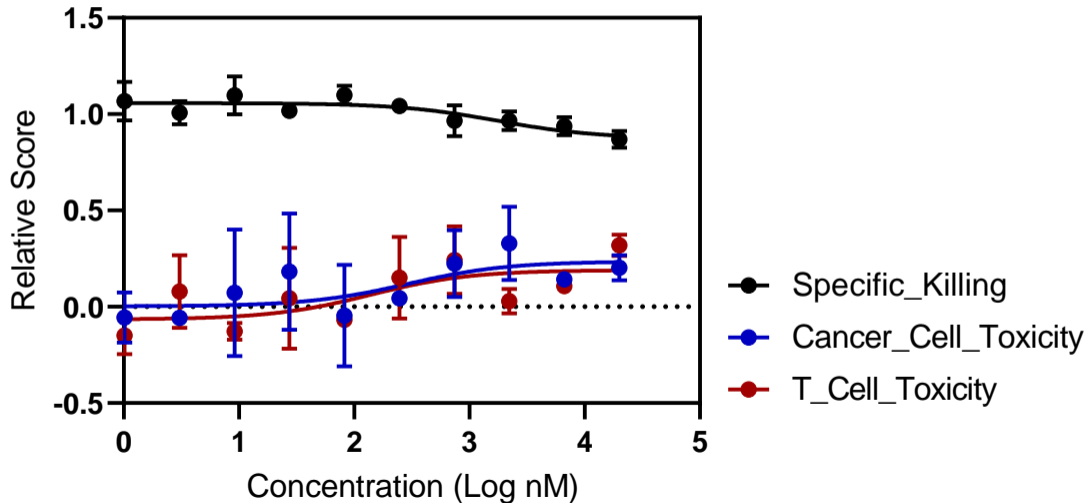

# Toyocamycin

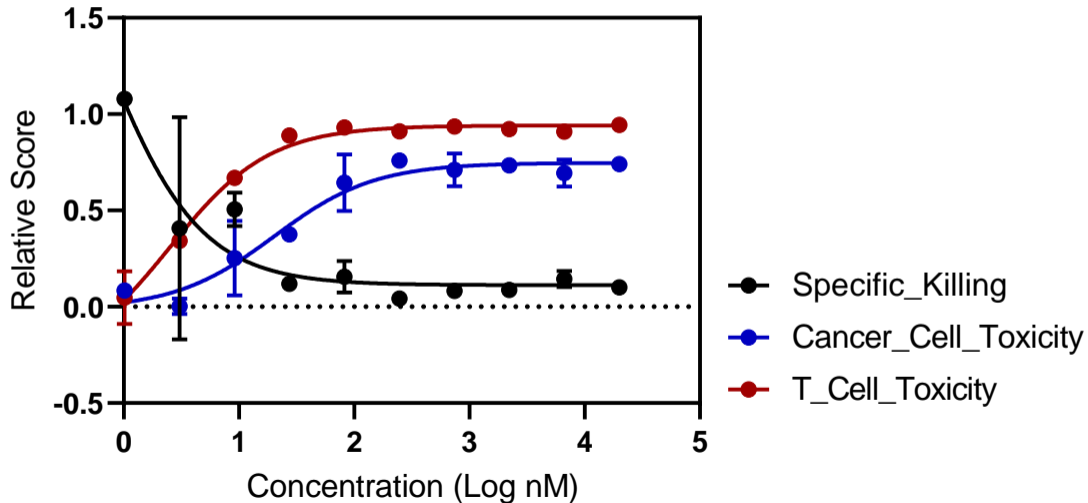

# Tretinoin

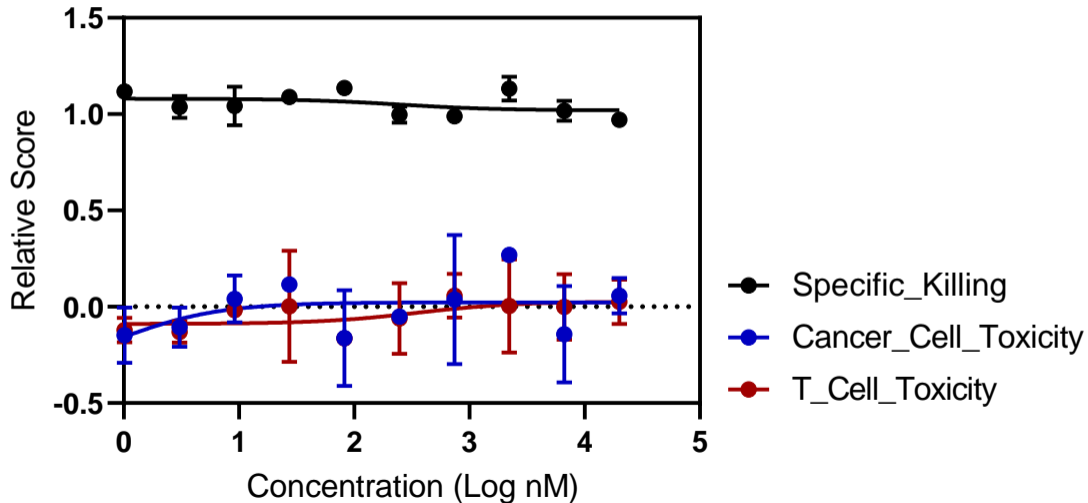

# Triclosan

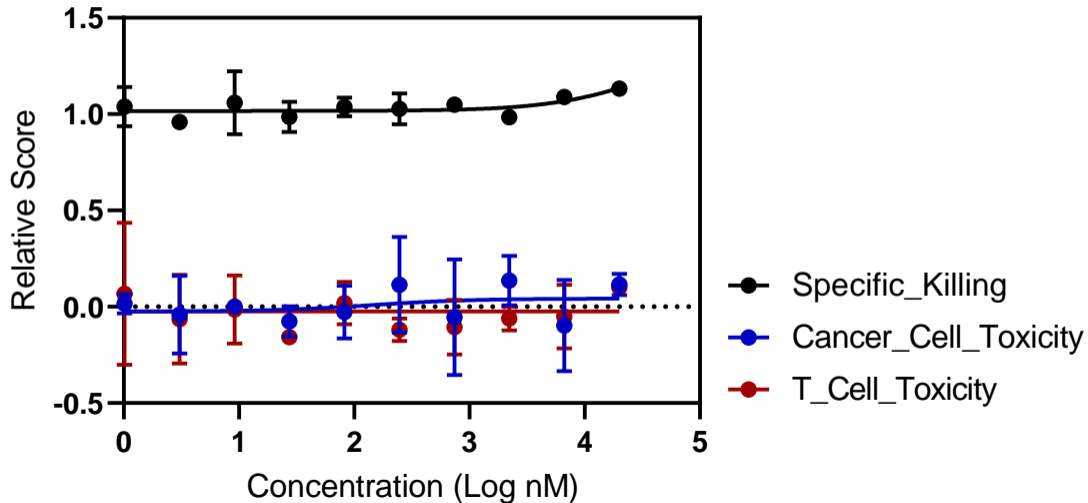

# Tunicamycin

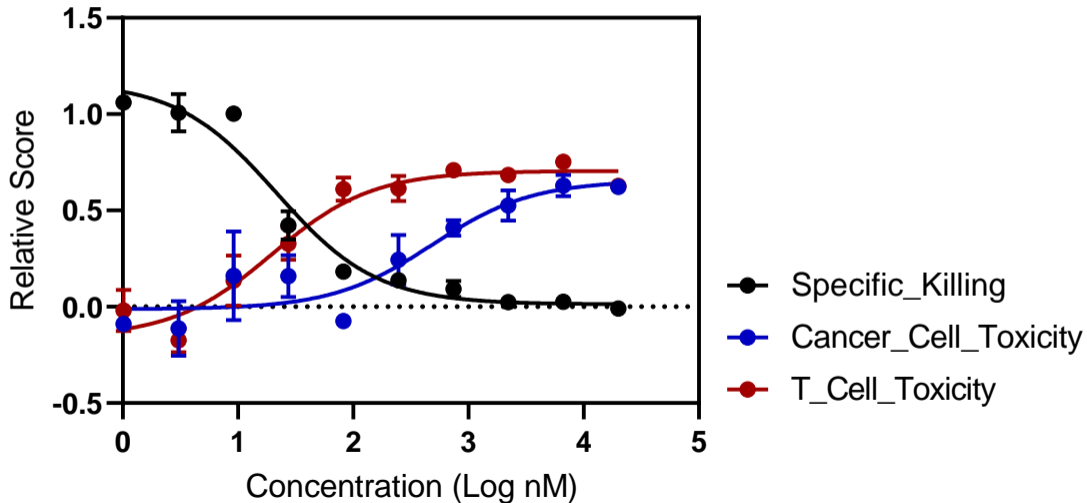

# U-104

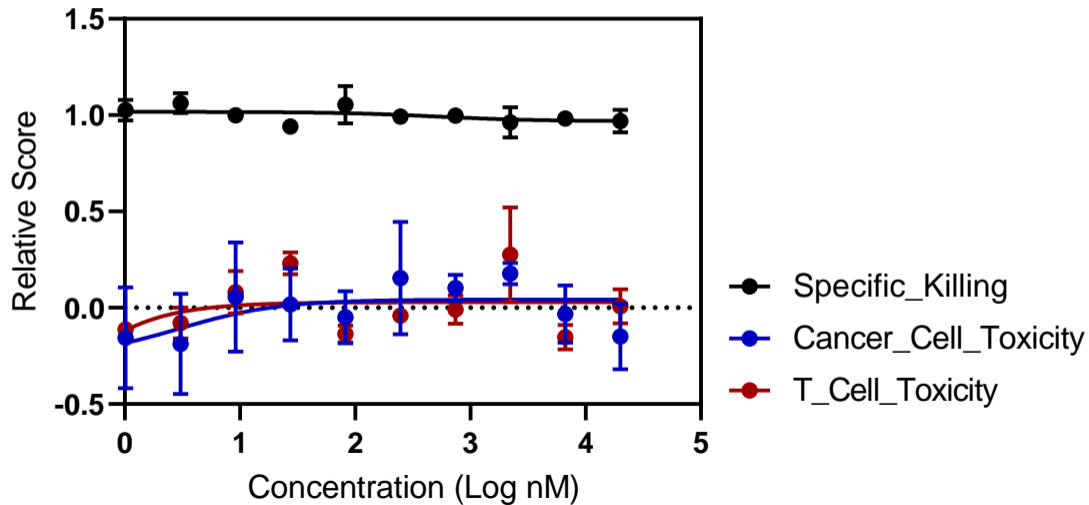

## Valproic acid, sodium salt

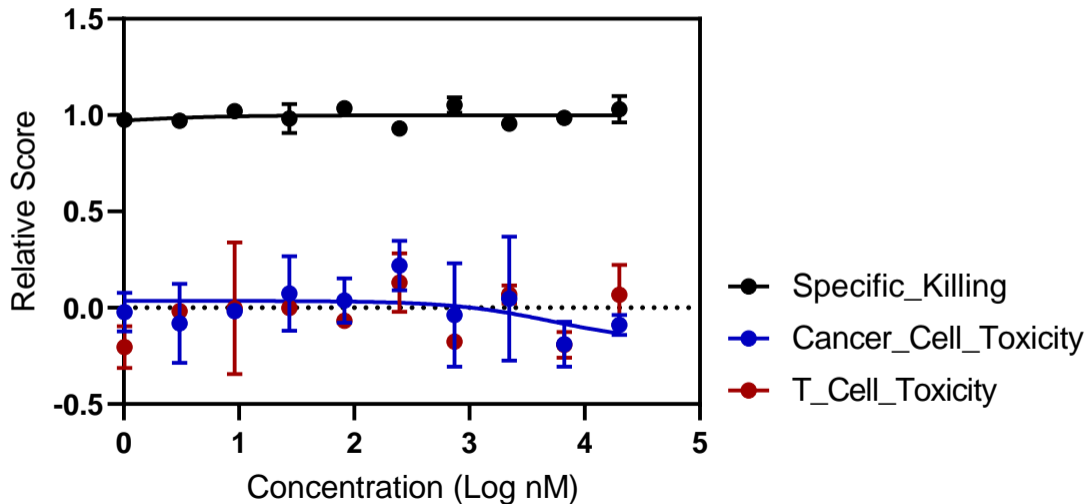



# VAS2870

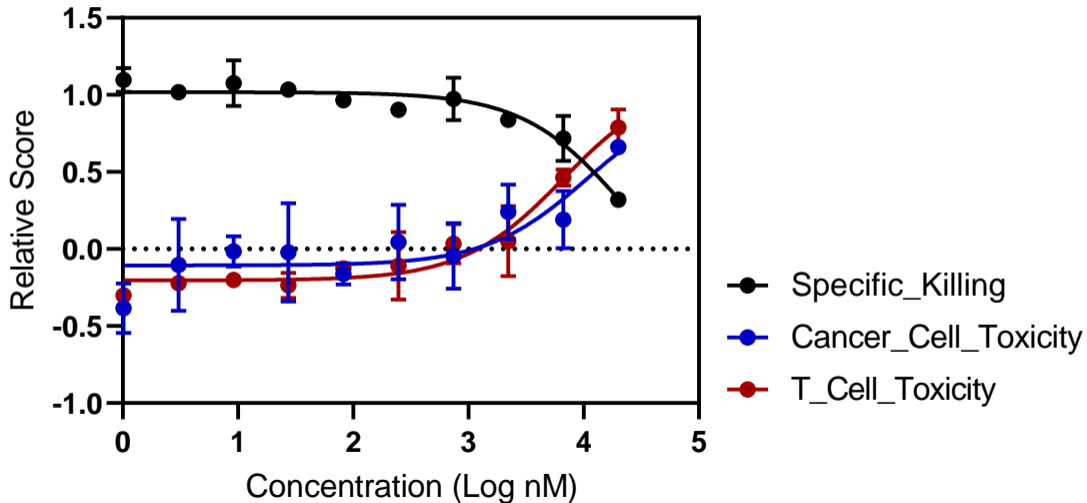

# Venlafaxine hydrochloride

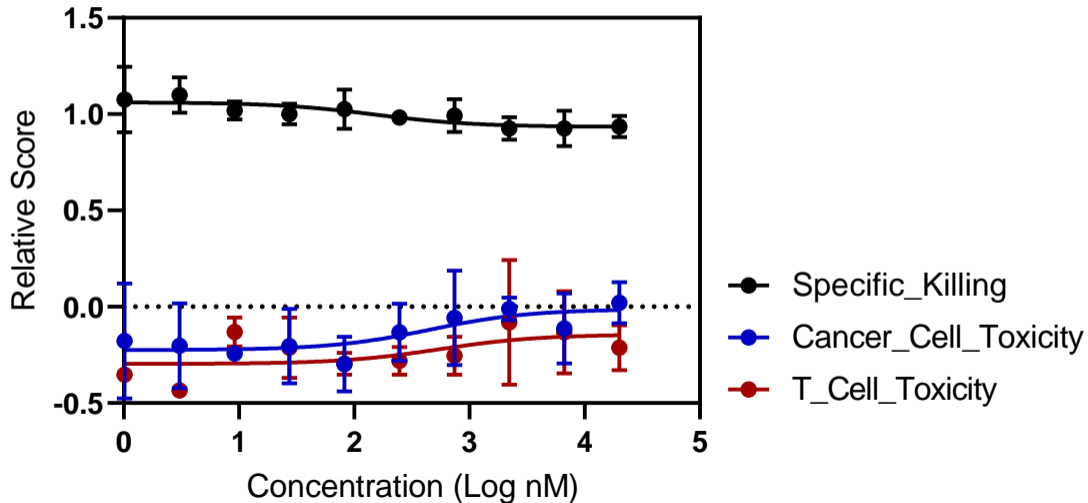

## Vincristine sulfate

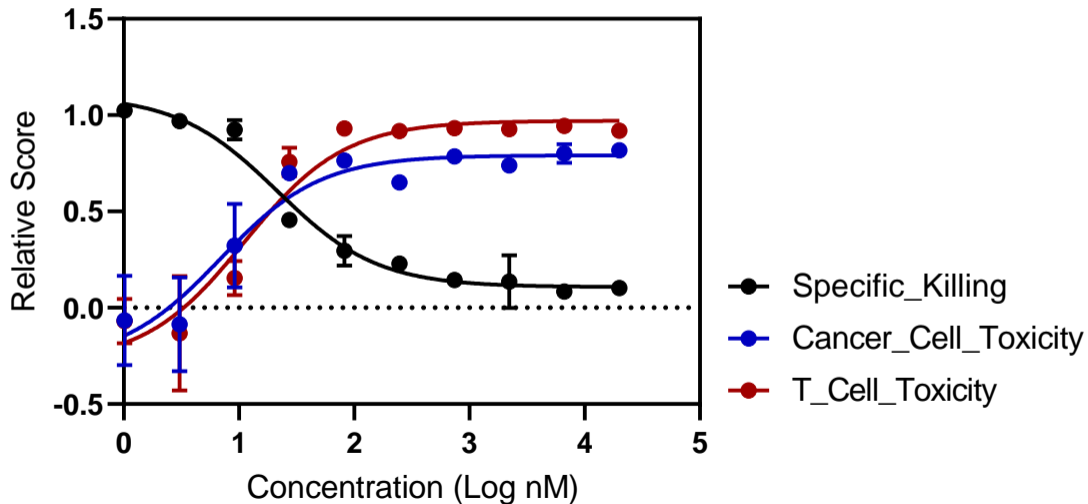

# Voglibose

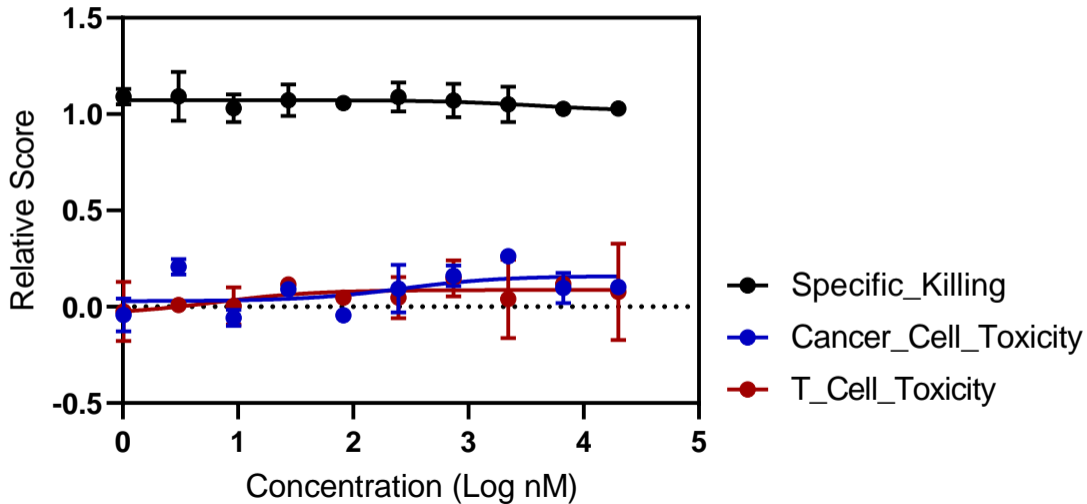

# WWL 113

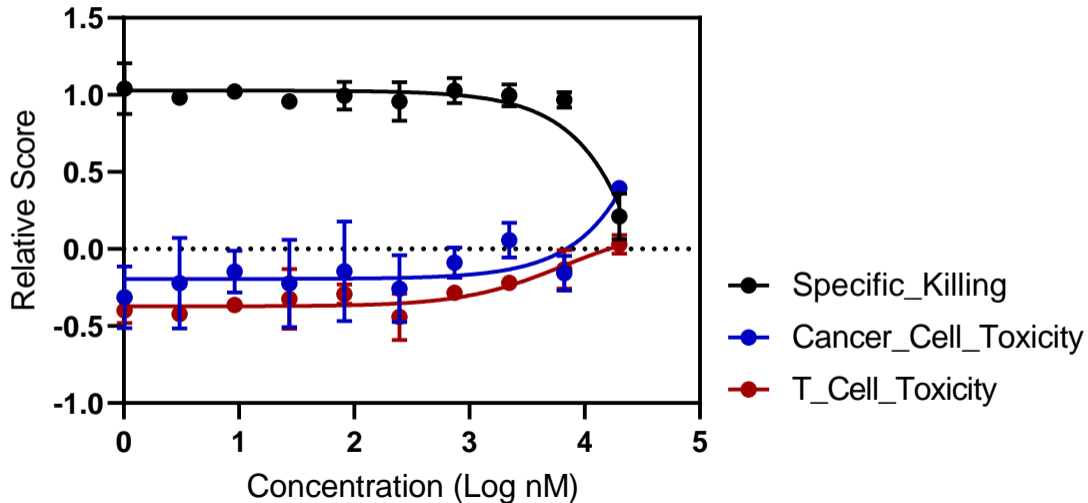

# Xanthohumol

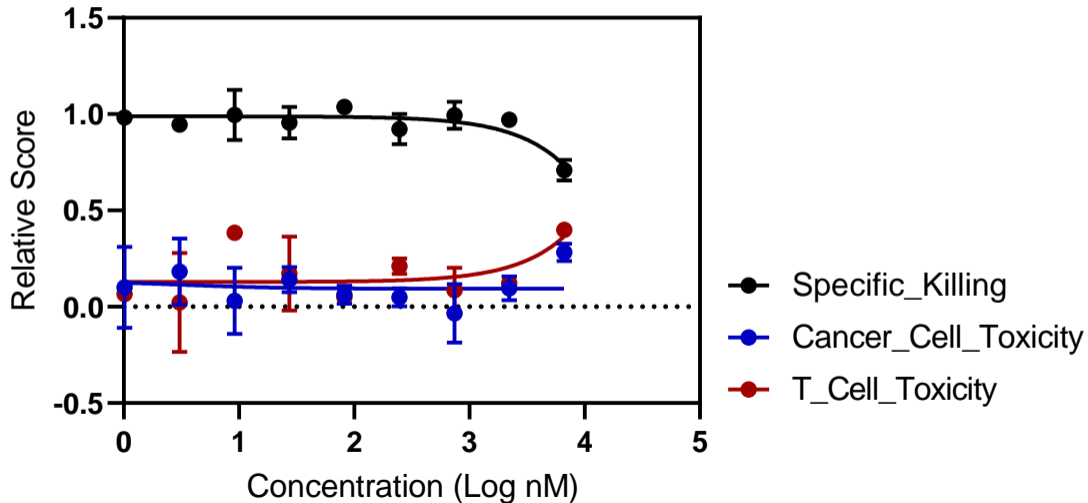

# Zalcitabine

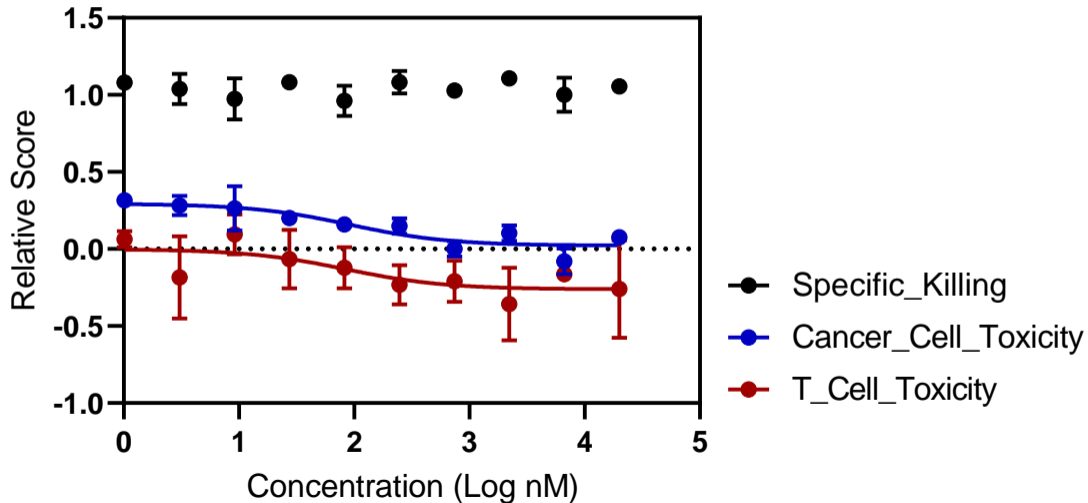

# Zileuton

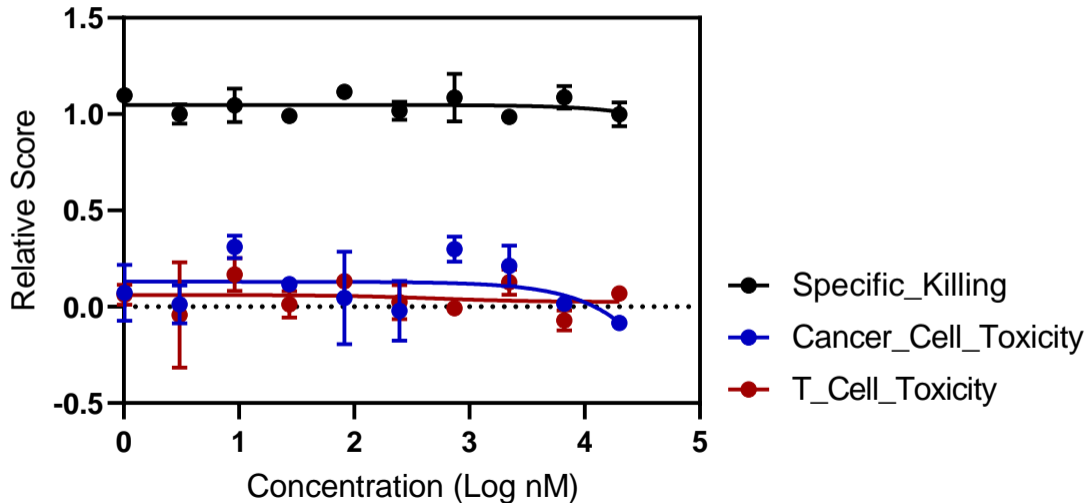

Supplement: NIHMS1651264-supplement-6.pdf [file NIHMS1651264-supplement-6.pdf]
